# Supplementary material for: Nano-zirconia as an excellent nano support for immobilization of sulfonic acid: a new, efficient and highly recyclable heterogeneous solid acid nanocatalyst for multicomponent reactions
Source: Royal Society of Chemistry journal article supplement (doi:10.1039/c5nj02430g), 2015-11-17
Supplement: c5nj02430g1.pdf [file c5nj02430g1.pdf]

## Supporting Information

**Nano-zirconia as an excellent nano support for immobilization of sulfonic acid: A new, efficient and high recyclable heterogeneous solid acid nanocatalyst for multicomponent reactions**

Salman Rahmani, Ali Amoozadeh\*, Mehrnoosh Bitaraf, Fatemeh Bolghan Abadi, Elham Tabrizian

Department of Chemistry, Semnan University, Semnan, Zip Code: 35131-19111, Iran, Fax: +98

(23) 33354110, Tel.: +98 (23) 33366177, e-mail: aamozadeh@semnan.ac.ir

## TABLE OF CONTENTS

|                                              |    |
|----------------------------------------------|----|
| Tables S1 and S2.....                        | 4  |
| Fig. 1. FT-IR of (6d). .....                 | 5  |
| Fig. 2. <sup>1</sup> H NMR of (7a). .....    | 6  |
| Fig. 3. <sup>1</sup> H NMR of (7c). .....    | 7  |
| Fig. 4. <sup>13</sup> C NMR of (7c). .....   | 8  |
| Fig. 5. <sup>1</sup> H NMR of (7d). .....    | 9  |
| Fig. 6. <sup>13</sup> C NMR of (7d). .....   | 10 |
| Fig. 7. <sup>1</sup> H NMR of (8a). .....    | 11 |
| Fig. 8. <sup>13</sup> C NMR of (8a). .....   | 12 |
| Fig. 9. <sup>1</sup> H NMR of (8b). .....    | 13 |
| Fig. 10. <sup>1</sup> H NMR of (8e). .....   | 14 |
| Fig. 11. <sup>13</sup> C NMR of (8e). .....  | 15 |
| Fig. 12. <sup>1</sup> H NMR of (8f). .....   | 16 |
| Fig. 13. <sup>1</sup> H NMR of (8h). .....   | 17 |
| Fig. 14. <sup>1</sup> H NMR of (8i). .....   | 18 |
| Fig. 15. <sup>1</sup> H NMR of (8j). .....   | 19 |
| Fig. 16. <sup>1</sup> H NMR of (10a). .....  | 20 |
| Fig. 17. <sup>1</sup> H NMR of (11a). .....  | 21 |
| Fig. 18. <sup>13</sup> C NMR of (11a). ..... | 22 |
| Fig. 19. <sup>1</sup> H NMR of (11d). .....  | 23 |
| Fig. 20. <sup>13</sup> C NMR of (11d). ..... | 24 |
| Fig. 21. <sup>1</sup> H NMR of (11f). .....  | 25 |
| Fig. 22. <sup>13</sup> C NMR of (11f). ..... | 26 |
| Fig. 23. <sup>1</sup> H NMR of (11j). .....  | 27 |
| Fig. 24. <sup>13</sup> C NMR of (11j). ..... | 28 |
| Fig. 25. <sup>1</sup> H NMR of (11k). .....  | 29 |
| Fig. 26. <sup>13</sup> C NMR of (11k). ..... | 30 |
| Fig. 27. <sup>1</sup> H NMR of (12a). .....  | 31 |
| Fig. 28. <sup>13</sup> C NMR of (12a). ..... | 32 |
| Fig. 29. <sup>1</sup> H NMR of (12b). .....  | 33 |
| Fig. 30. <sup>13</sup> C NMR of (12b). ..... | 34 |

|                                        |    |
|----------------------------------------|----|
| Fig. 31. $^1\text{H}$ NMR of (12c).    | 35 |
| Fig. 32. $^{13}\text{C}$ NMR of (12c). | 36 |
| Fig. 33. $^1\text{H}$ NMR of (13a).    | 37 |
| Fig. 34. $^{13}\text{C}$ NMR of (13a). | 38 |
| Fig. 35. $^1\text{H}$ NMR of (13b).    | 39 |
| Fig. 36. $^{13}\text{C}$ NMR of (13b). | 40 |
| Fig. 37. $^1\text{H}$ NMR of (13e).    | 41 |
| Fig. 38. $^{13}\text{C}$ NMR of (13e). | 42 |
| Fig. 39. $^1\text{H}$ NMR of (14a).    | 43 |
| Fig. 40. $^{13}\text{C}$ NMR of (14a). | 44 |
| Fig. 41. $^1\text{H}$ NMR of (14b).    | 45 |
| Fig. 42. $^1\text{H}$ NMR of (14f).    | 46 |
| Fig. 43. $^{13}\text{C}$ NMR of (14f). | 47 |
| Fig. 44. $^1\text{H}$ NMR of (14j).    | 48 |
| Fig. 45. $^{13}\text{C}$ NMR of (14j). | 49 |
| Fig. 46. $^1\text{H}$ NMR of (14k).    | 50 |
| Fig. 47. $^{13}\text{C}$ NMR of (14k). | 51 |
| Fig. 48. $^1\text{H}$ NMR of (14l).    | 52 |
| Fig. 49. $^{13}\text{C}$ NMR of (14l). | 53 |
| Fig. 50. $^1\text{H}$ NMR of (14m).    | 54 |
| Fig. 51. $^{13}\text{C}$ NMR of (14m). | 55 |
| Fig. 52. $^1\text{H}$ NMR of (14n).    | 56 |
| Fig. 53. $^{13}\text{C}$ NMR of (14n). | 57 |
| Fig. 54. $^1\text{H}$ NMR of (15a).    | 58 |
| Fig. 55. $^{13}\text{C}$ NMR of (15a). | 59 |
| Fig. 56. $^1\text{H}$ NMR of (15b).    | 60 |
| Fig. 57. $^{13}\text{C}$ NMR of (15b). | 61 |
| Fig. 58. FT-IR of (15c).               | 62 |
| Fig. 59. $^1\text{H}$ NMR of (15c).    | 63 |
| Fig. 60. $^{13}\text{C}$ NMR of (15c). | 64 |
| Fig. 61. $^1\text{H}$ NMR of (15d).    | 65 |
| Fig. 62. $^{13}\text{C}$ NMR of (15d). | 66 |

**Table S1.** The experimental levels of variables in CCD for the synthesis of 2-amino-7,7-dimethyl-5-oxo-4-phenyl-1,4,5,6,7,8-hexahydroquinoline-3-carbonitrile.

| Independent variables                 | Levels            |             |                |              |                    |
|---------------------------------------|-------------------|-------------|----------------|--------------|--------------------|
|                                       | Lowest<br>(-1.68) | Low<br>(-1) | Central<br>(0) | High<br>(+1) | Highest<br>(+1.68) |
| X <sub>1</sub> : Catalyst amount (mg) | 13.27             | 16          | 20             | 24           | 26.73              |
| X <sub>2</sub> : Temperature (°C)     | 83.18             | 90          | 100            | 110          | 116.81             |
| X <sub>3</sub> : Time (min)           | 6.59              | 10          | 15             | 20           | 23.40              |

**Table S2.** Conditions of predicted experiments in CCD for three effective factors in the synthesis of 2-amino-7,7-dimethyl-5-oxo-4-phenyl-1,4,5,6,7,8-hexahydroquinoline-3-carbonitrile accompanied to the observed responses.

| Run | X <sub>1</sub> | X <sub>2</sub> | X <sub>3</sub> | Yield (%) |
|-----|----------------|----------------|----------------|-----------|
| 1   | -1             | +1             | -1             | 54.85     |
| 2   | +1             | +1             | -1             | 74.03     |
| 3   | -1             | +1             | +1             | 72.82     |
| 4   | 0              | -1             | -1             | 68.66     |
| 5   | 0              | +1.68          | 0              | 88.04     |
| 6   | 0              | 0              | 0              | 93.8      |
| 7   | +1             | +1             | +1             | 89.55     |
| 8   | 0              | 0              | 0              | 94.42     |
| 9   | +1.68          | 0              | 0              | 79.55     |
| 10  | +1             | -1             | +1             | 82.86     |
| 11  | 0              | 0              | 0              | 93.56     |
| 12  | -1             | -1             | -1             | 53.76     |
| 13  | 0              | -1.68          | 0              | 80.72     |
| 14  | -1             | -1             | +1             | 73.93     |
| 15  | 0              | 0              | 0              | 90.45     |
| 16  | 0              | 0              | +1.68          | 85.31     |
| 17  | 0              | 0              | 0              | 91.76     |
| 18  | 0              | 0              | -1.68          | 48.65     |
| 19  | 0              | 0              | 0              | 92.12     |
| 20  | -1.68          | 0              | 0              | 56.36     |

### Spectral data of some selected compound

#### 3-(2-amino-3-cyano-7,7-dimethyl-5-oxo-1,4,5,6,7,8-hexahydroquinolin-4-yl)phenyl nitrate (6d)

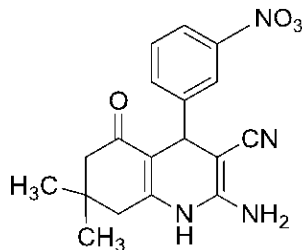

M. P.: 280-284 °C; IR (KBr,  $\text{Cm}^{-1}$ )  $\nu_{\text{max}}$ : 3271, 3247, 3184, 2400, 1647, 1601, 1527, 1487, 1346, 1222, 1143.

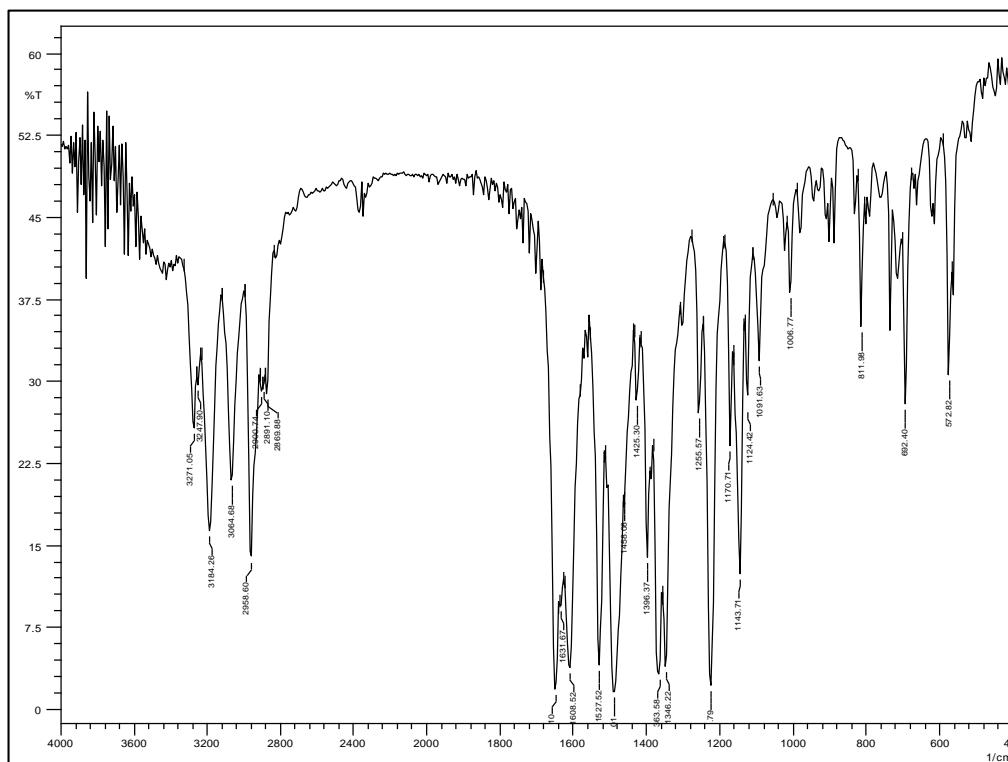

Fig. 1. FT-IR of (6d).

## 9-phenyl-3,4,6,7,9,10-hexahydroacridine-1,8(2H,5H)-dione (7a)

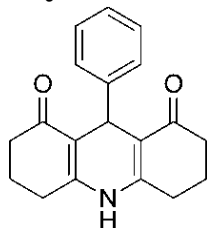

M. P.: 280-282 °C; IR (KBr,  $\text{Cm}^{-1}$ )  $\nu_{\text{max}}$ : 3273, 3196, 3080, 1624, 1601, 1483, 1218, 1140.  $^1\text{H}$  NMR (400 MHz, DMSO):  $\delta$  1.90-2.09 (m, 4H), 2.26-2.28 (m, 2H), 2.30-2.38 (m, 2H), 2.51-2.64 (m, 4H), 4.79 (s, 1H), 7.05-7.09 (t,  $J = 7.6$ , 2H), 7.11-7.12 (d,  $J = 8.4$  Hz, 1H), 7.23-7.31 (dd,  $J = 8$ , 24.2, 2H), 9.17 (s, 1H). Anal. Calc. for  $\text{C}_{19}\text{H}_{19}\text{NO}_2$ ; C 77.79, H 6.53, N 4.77, O 10.91; Found: C 77.73, H 6.59, N 4.71, O 10.92.

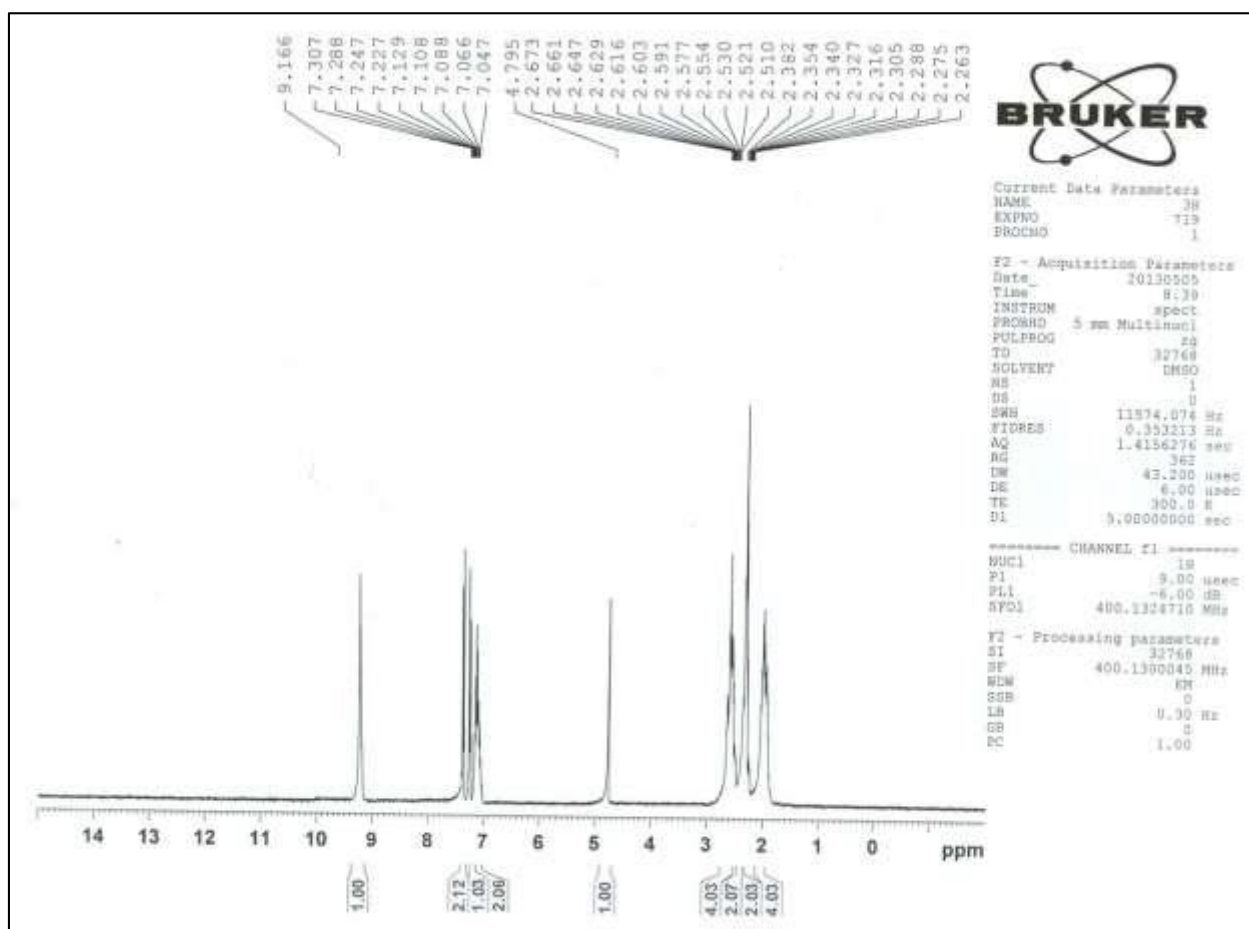

Fig. 2.  $^1\text{H}$  NMR of (7a).

**9-(4-bromophenyl)-3,4,6,7,9,10-hexahydroacridine-1,8(2H,5H)-dione (7c)**

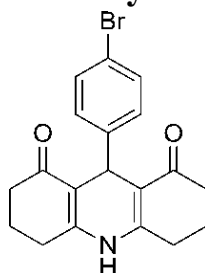

M. P.: 310-312 °C; IR (KBr,  $\text{Cm}^{-1}$ )  $\nu_{\text{max}}$ : 3340, 3244, 2958, 2927, 1647, 1627, 1549, 1450, 1367, 1227, 1171.  $^1\text{H}$  NMR (400 MHz, DMSO):  $\delta$  1.92-2.08 (m, 4H), 2.28-2.32 (m, 2H), 2.34-2.40 (m, 2H), 2.53-2.65 (m, 4H), 4.76 (s, 1H), 7.13-7.27 (m, 2H), 7.33-7.43 (dd,  $J=30.6, 8.4$  Hz, 2H), 9.38 (s, 1H).  $^{13}\text{C}$  NMR (100 MHz, DMSO- $d_6$ ):  $\delta$  20.10, 20.27, 27.13, 31.39, 36.76, 36.90, 112.08, 117.66, 127.83, 129.43, 146.47, 151.59, 171.19, 194.58. Anal. Calc. for  $\text{C}_{19}\text{H}_{18}\text{BrNO}_2$ ; C 61.30, H 4.87, N 3.76, O 8.60; Found: C 61.33, H 4.81, N 3.71, O 8.69.

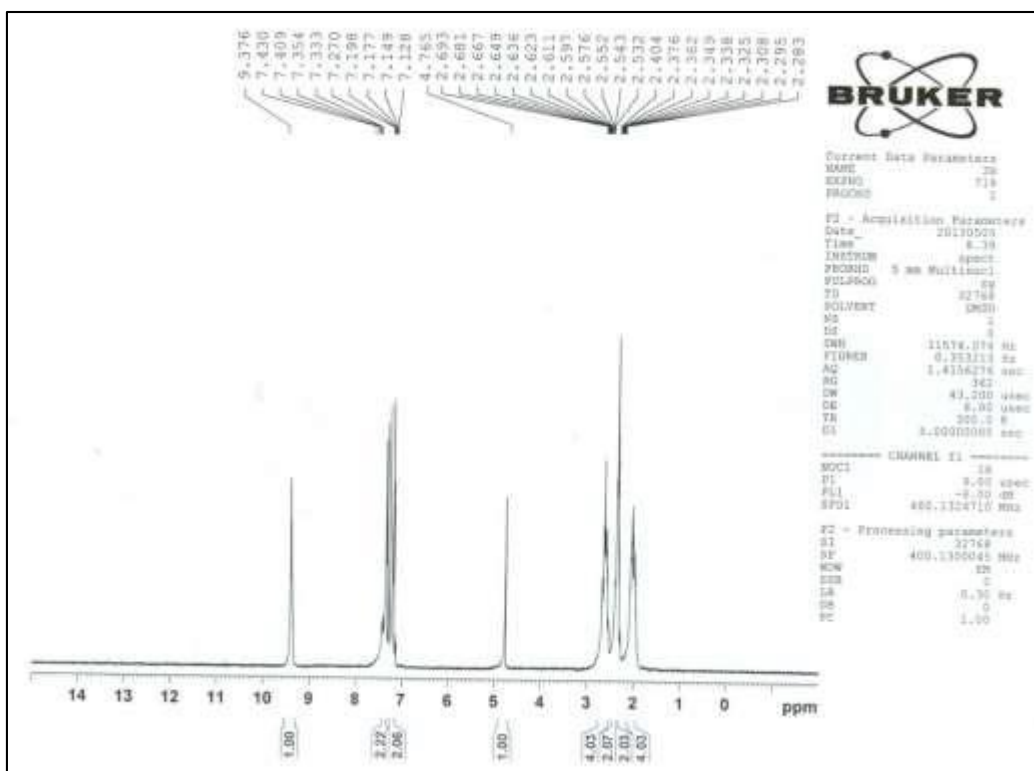

**Fig. 3.**  $^1\text{H}$  NMR of (7c).

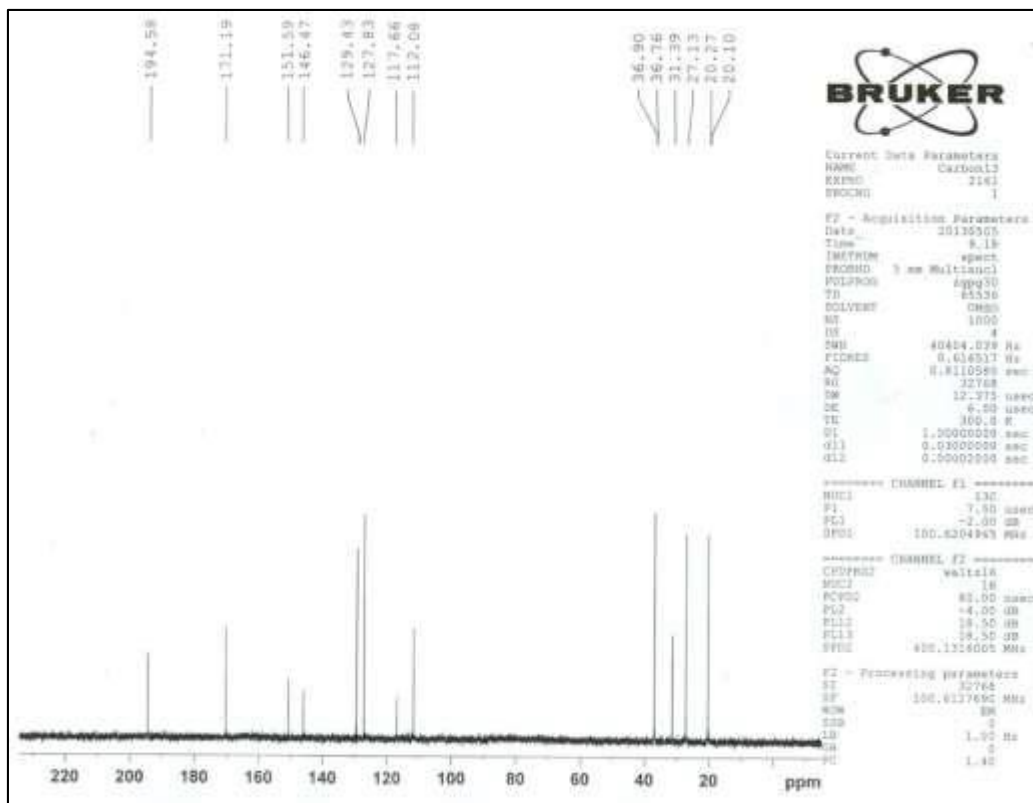

Fig. 4. <sup>13</sup>C NMR of (7c).



### 9-(p-tolyl)-3,4,6,7,9,10-hexahydroacridine-1,8(2H,5H)-dione (7d)

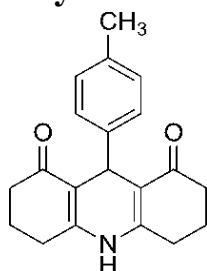

M. P.: 254-256 °C; IR (KBr,  $\text{Cm}^{-1}$ )  $\nu_{\text{max}}$ : 3286, 3203, 3068, 2943, 2887, 1639, 1608, 1458, 1364, 1232, 1176.  $^1\text{H}$  NMR (400 MHz, DMSO):  $\delta$  1.96-2.07 (m, 4H), 2.26 (s, 3H), 2.29-2.42 (m, 4H), 2.52-2.69 (m, 4H), 4.79 (s, 1H), 7.03-7.05 (d,  $J = 8$  Hz, 2H), 7.12-7.21 (d,  $J = 7.6$  Hz, 2H), 9.18 (s, 1H).  $^{13}\text{C}$  NMR (100 MHz, DMSO- $d^6$ ):  $\delta$  20.31, 21.06, 27.15, 31.22, 36.98, 55.14, 113.52, 117.03, 128.25, 128.84, 129.33, 135.86, 146.36, 150.53, 169.57, 194.52. Anal. Calc. for  $\text{C}_{20}\text{H}_{21}\text{NO}_2$ ; C 78.15, H 6.89, N 4.56, O 10.41; Found: C 78.19, H 6.83, N 4.58, O 10.45.

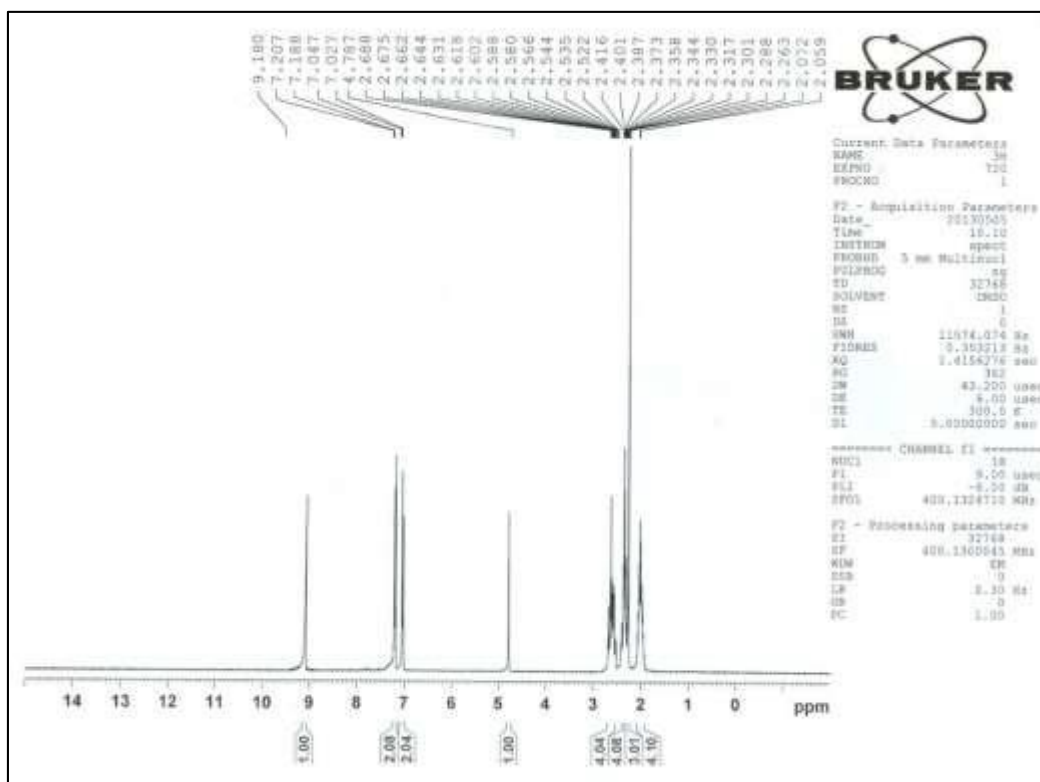

Fig. 5.  $^1\text{H}$  NMR of (7d).

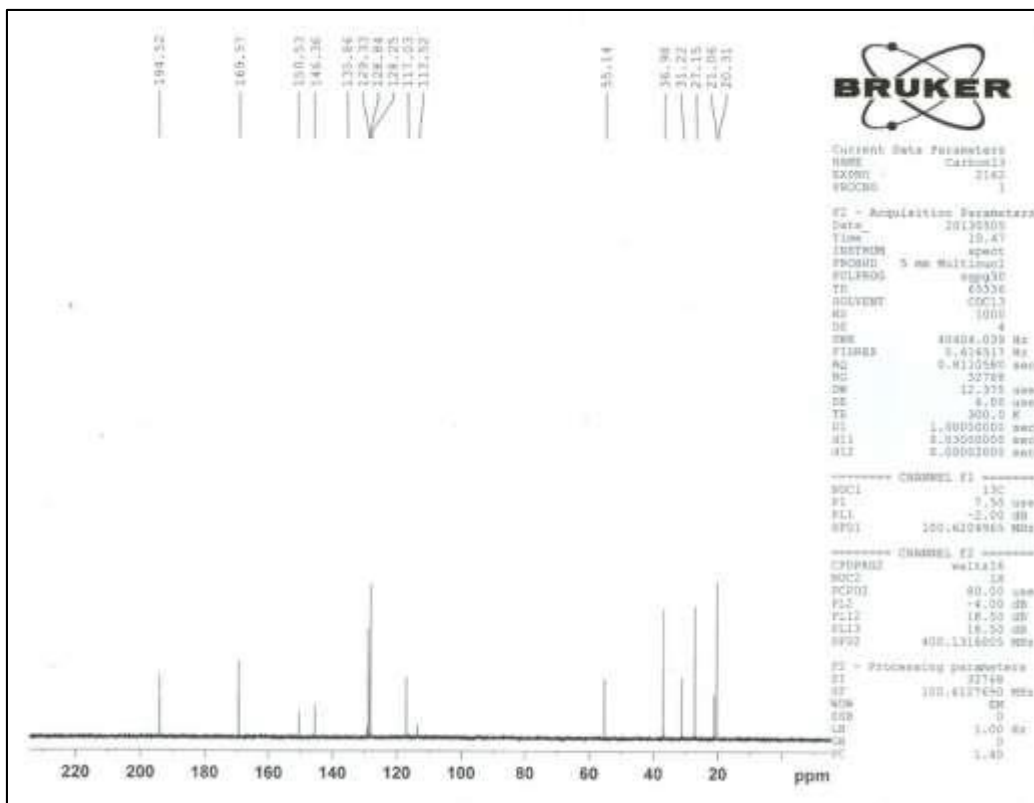

Fig. 6. <sup>13</sup>C NMR of (7d).

**3,3,6,6-tetra methyl-9-phenyl-3,4,6,7,9,10-hexahydroacridine-1,8-(2H,5H)-dione (8a)**

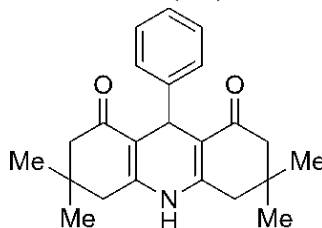

M. P.: 290-291 °C; IR (KBr,  $\text{Cm}^{-1}$ )  $\nu_{\text{max}}$ : 3279, 3209, 3063, 2955, 2932, 1636, 1605, 1481, 1365, 1219, 1142.  $^1\text{H}$  NMR (400 MHz, DMSO):  $\delta$  0.84 (s, 6H), 0.99 (s, 6H), 1.96 (d,  $J=21.5$  Hz, 2H), 2.15 (d,  $J=21.5$  Hz, 2H), 2.30 (d,  $J=22.8$  Hz, 2H), 2.40-2.49 (m, 2H), 4.8 (s, 1H), 7.00-7.14 (m, 5H), 9.28 (s, 1H).  $^{13}\text{C}$  NMR (100 MHz, DMSO- $d_6$ ):  $\delta$  26.45, 29.13, 32.14, 32.86, 50.24, 111.47, 125.46, 127.56, 127.63, 147.15, 149.32, 194.36. Anal. Calc. for  $\text{C}_{23}\text{H}_{27}\text{NO}_2$ ; C 79.05, H 7.79, N 4.01, O 9.16; Found: C 79.08, H 7.73, N 4.06, O 9.11.

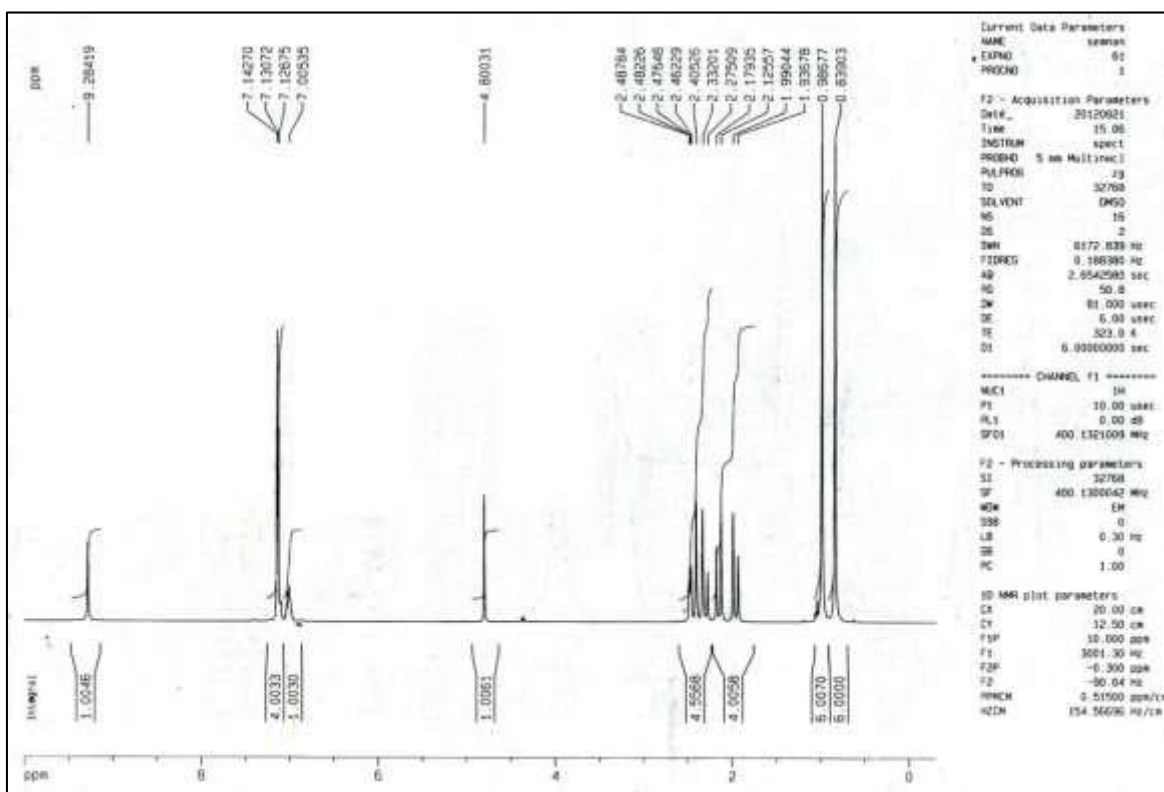

**Fig. 7.**  $^1\text{H}$  NMR of (8a).

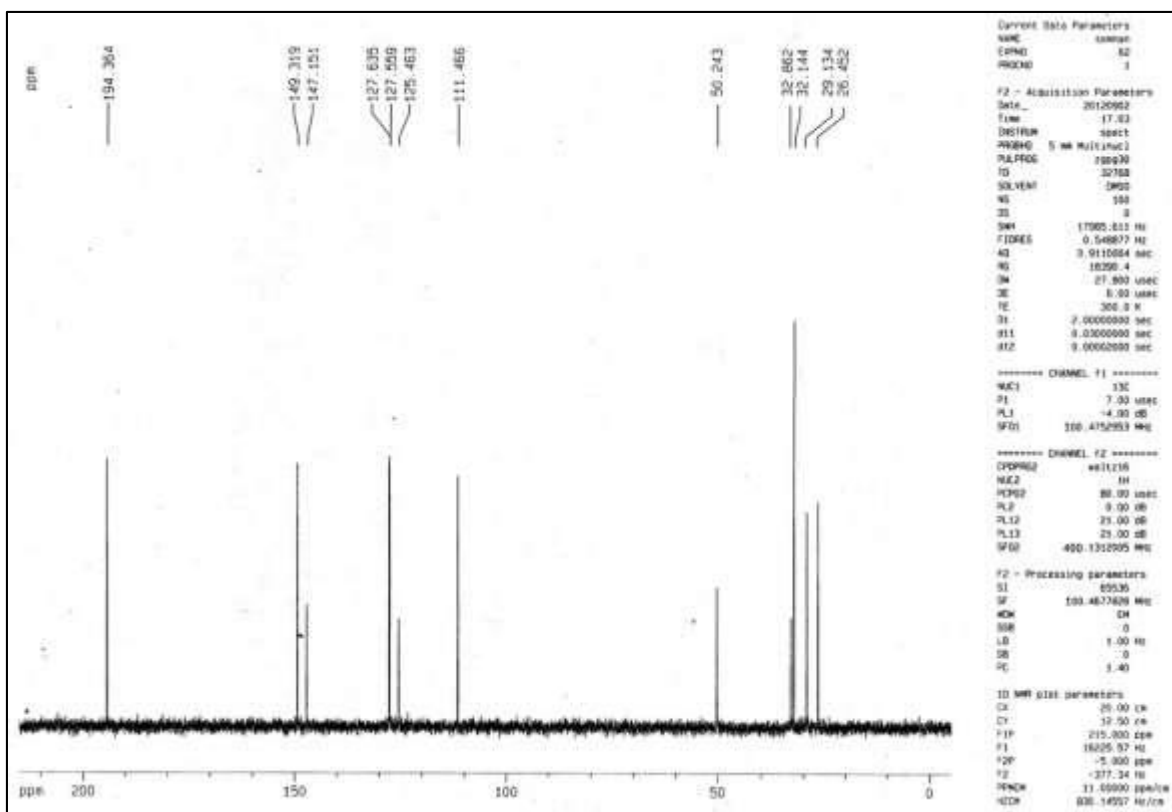

Fig. 8.  $^{13}\text{C}$  NMR of (8a).

**9-(4-methoxyphenyl)-3,3,6,6-tetramethyl-3,4,6,7,9,10-hexahydroacridine-1,8(2H,5H)-dione (8b)**

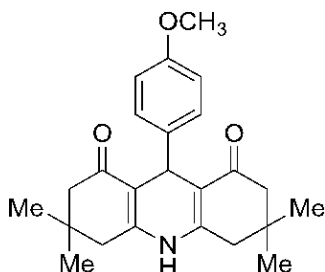

M. P.: 274-276 °C; IR (KBr,  $\text{cm}^{-1}$ )  $\nu_{\text{max}}$ : 3277, 3203, 3070, 2959, 2870, 1643, 1606, 1508, 1483, 1367, 1223, 1171.  $^1\text{H}$  NMR (500 MHz, DMSO):  $\delta$  0.90 (s, 6H), 1.04 (s, 6H), 2.08 (d,  $J=9.7$  Hz, 2H), 2.26 (d,  $J=9.9$  Hz, 2H), 2.48-2.52 (m, 2H), 2.57 (d,  $J=10.8$  Hz, 2H), 3.68 (s, 3H), 4.7 (s, 1H), 6.77-6.78 (t,  $J=4.1$  Hz, 2H), 7.06-7.08 (t,  $J=5.12$  Hz, 2H), 9.21 (s, 1H). Anal. Calc. for  $\text{C}_{24}\text{H}_{29}\text{NO}_3$ ; C 75.96, H 7.70, N 3.69, O 12.65; Found: C 75.90, H 7.72, N 3.62, O 12.69.

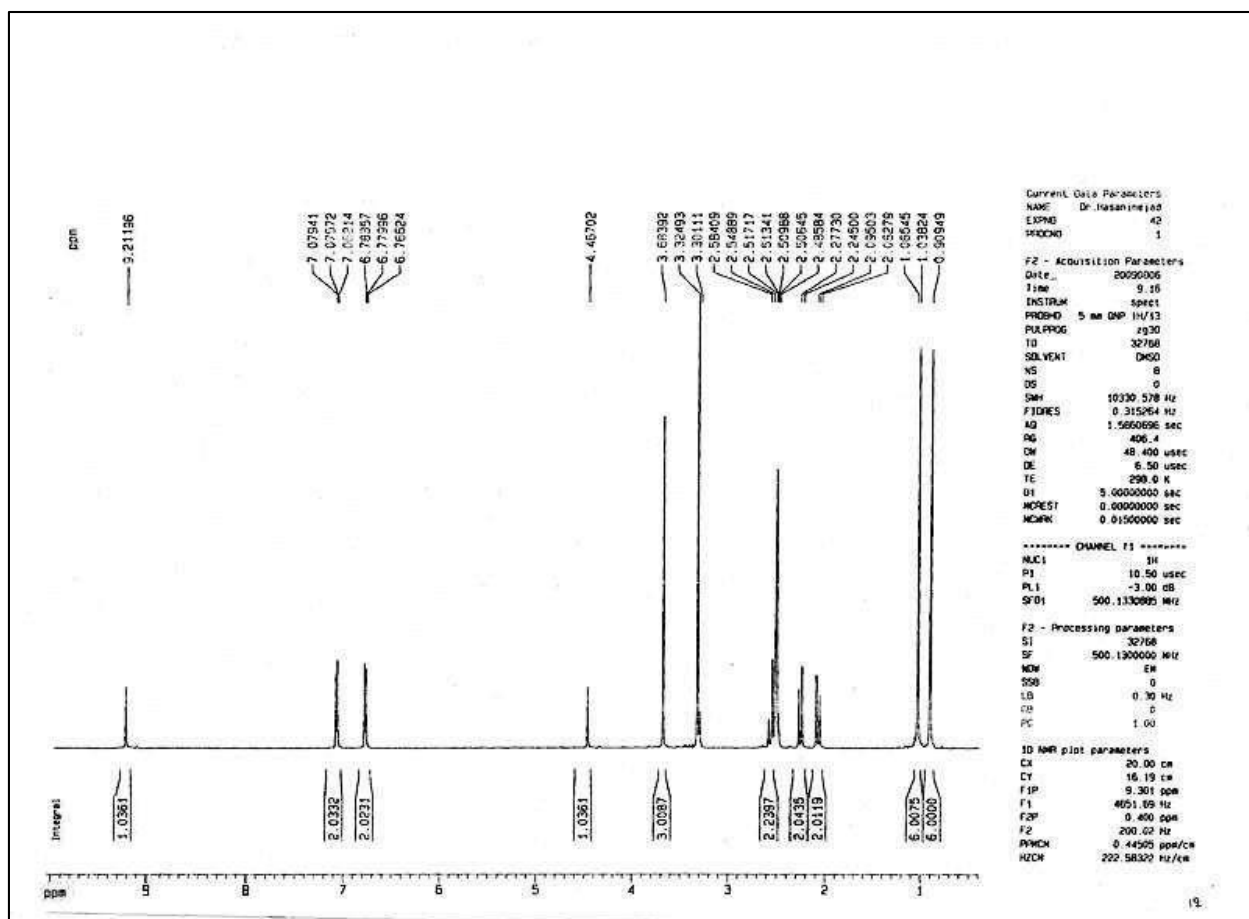

**Fig. 9.**  $^1\text{H}$  NMR of (8b).

**9-(4-fluorophenyl)-3,3,6,6-tetramethyl-3,4,6,7,9,10-hexahydroacridine-1,8(2H,5H)-dione (8e)**

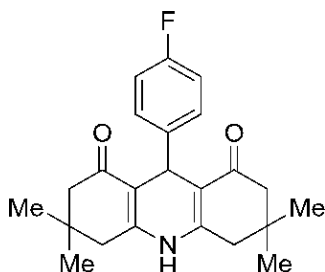

M. P.: 292-294 °C; FT-IR (KBr,  $\text{Cm}^{-1}$ )  $\nu_{\text{max}}$ : 3280, 3197, 3070, 2954, 2869, 1635, 1608, 1570, 1437, 1364, 1256, 1145.  $^1\text{H}$  NMR (400 MHz, DMSO):  $\delta$ : 0.99 (s, 6H), 1.11 (s, 6H), 2.15-2.26 (dd,  $J$ = 28, 16 Hz, 4H), 2.46 (s, 4H), 4.73 (s, 1H), 6.88-6.92 (t,  $J$ = 8.8 Hz, 2H), 7.24-7.27 (d,  $J$ = 10.8 Hz, 2H), 9.33 (s, 1H).  $^{13}\text{C}$  NMR (100 MHz, DMSO- $d_6$ ):  $\delta$  27.29, 29.26, 31.22, 32.20, 50.73, 111.94, 126.07, 127.80, 127.87, 147.17, 149.30, 149.60, 194.46. Anal. Calc. for  $\text{C}_{23}\text{H}_{26}\text{FNO}_2$ ; C 75.18, H 7.13, N 3.81, O 8.71; Found: C 75.13, H 7.18, N 3.78, O 8.76.

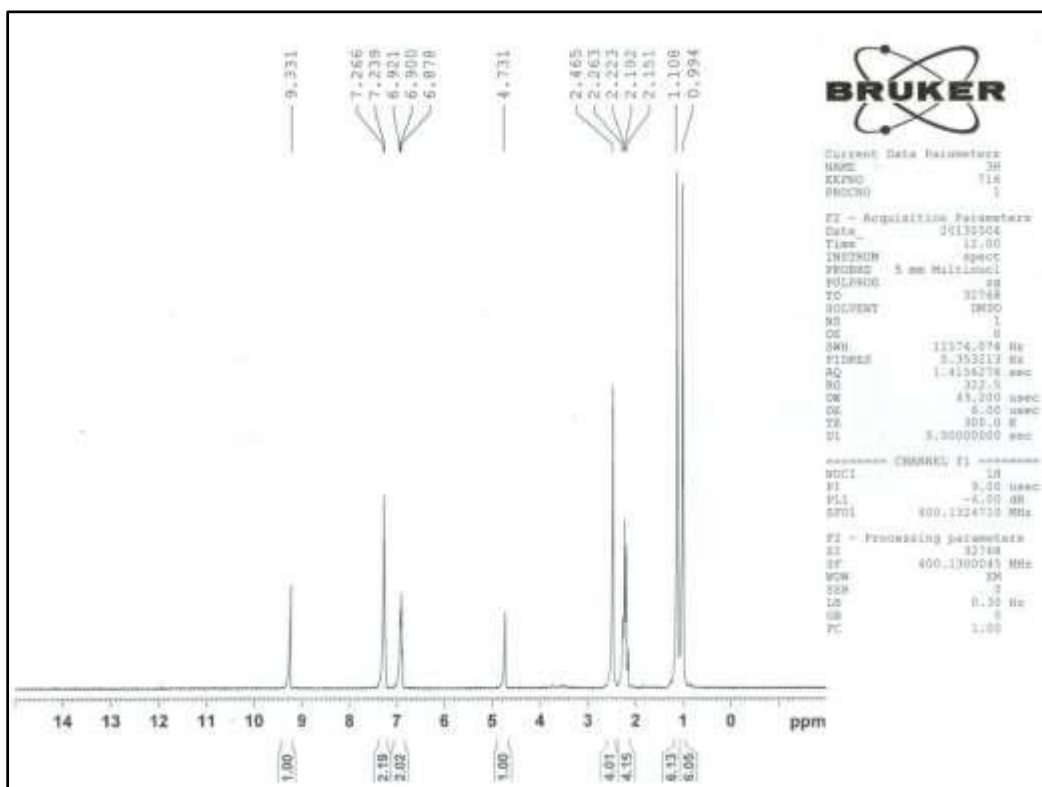

**Fig. 10.**  $^1\text{H}$  NMR of (8e).

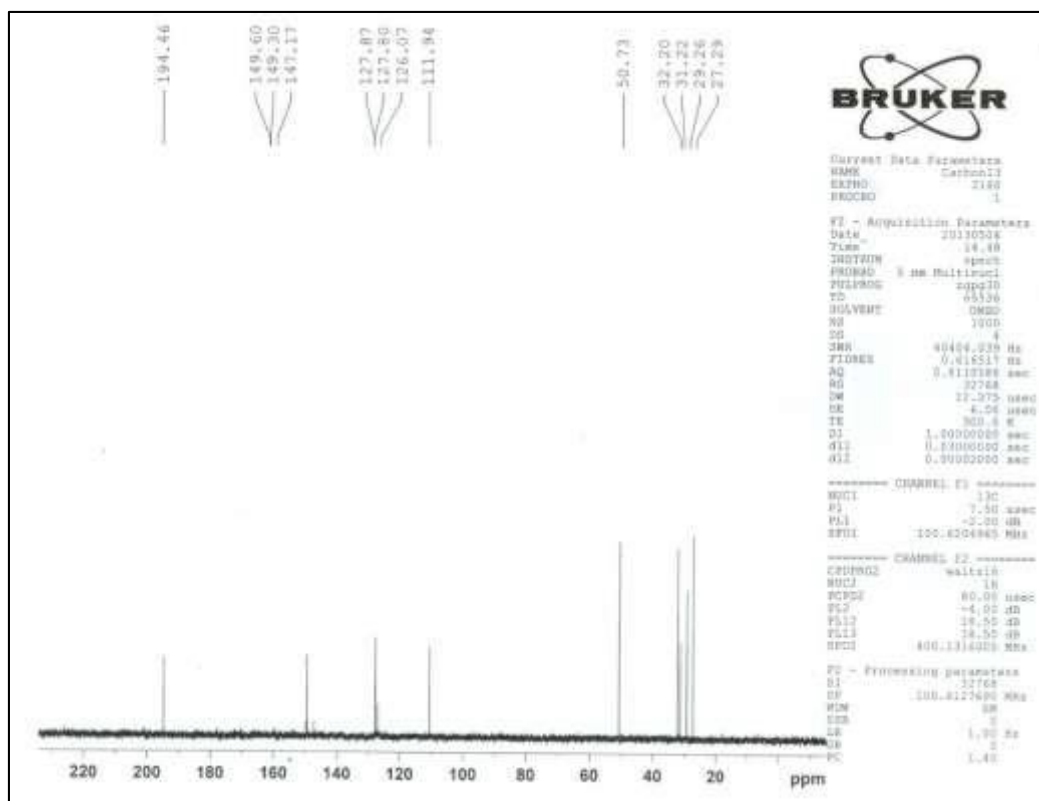

Fig. 11.  $^{13}\text{C}$  NMR of (8e).

**9-(4-chlorophenyl)-3,3,6,6-tetramethyl-3,4,6,7,9,10-hexahydroacridine-1,8(2H,5H)-dione (8f)**

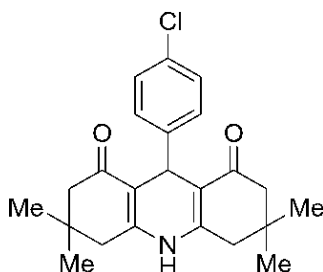

M. P.: 299-302 °C; FT-IR (KBr,  $\text{Cm}^{-1}$ )  $\nu_{\text{max}}$ : 3288, 3205, 3068, 2956, 2869, 1643, 1608, 1475, 1363, 1223, 1171.  $^1\text{H NMR}$  (500 MHz, DMSO):  $\delta$ : 0.91 (s, 6H), 1.04 (s, 6H), 2.08-2.11 (d,  $J=16$ , 2H), 2.26-2.29 (d,  $J=16$ , 2H), 2.50-2.60 (dd,  $J=14.65$ , 4H), 4.51 (s, 1H), 7.18-7.20 (d,  $J=8.2$  Hz, 2H), 7.28-7.29 (d,  $J=8.2$  Hz, 2H), 9.32 (s, 1H). Anal. Calc. for  $\text{C}_{23}\text{H}_{26}\text{ClNO}_2$ ; C 71.96, H 6.83, N 3.65, O 8.33; Found: C 71.90, H 6.89, N 3.59, O 8.32.

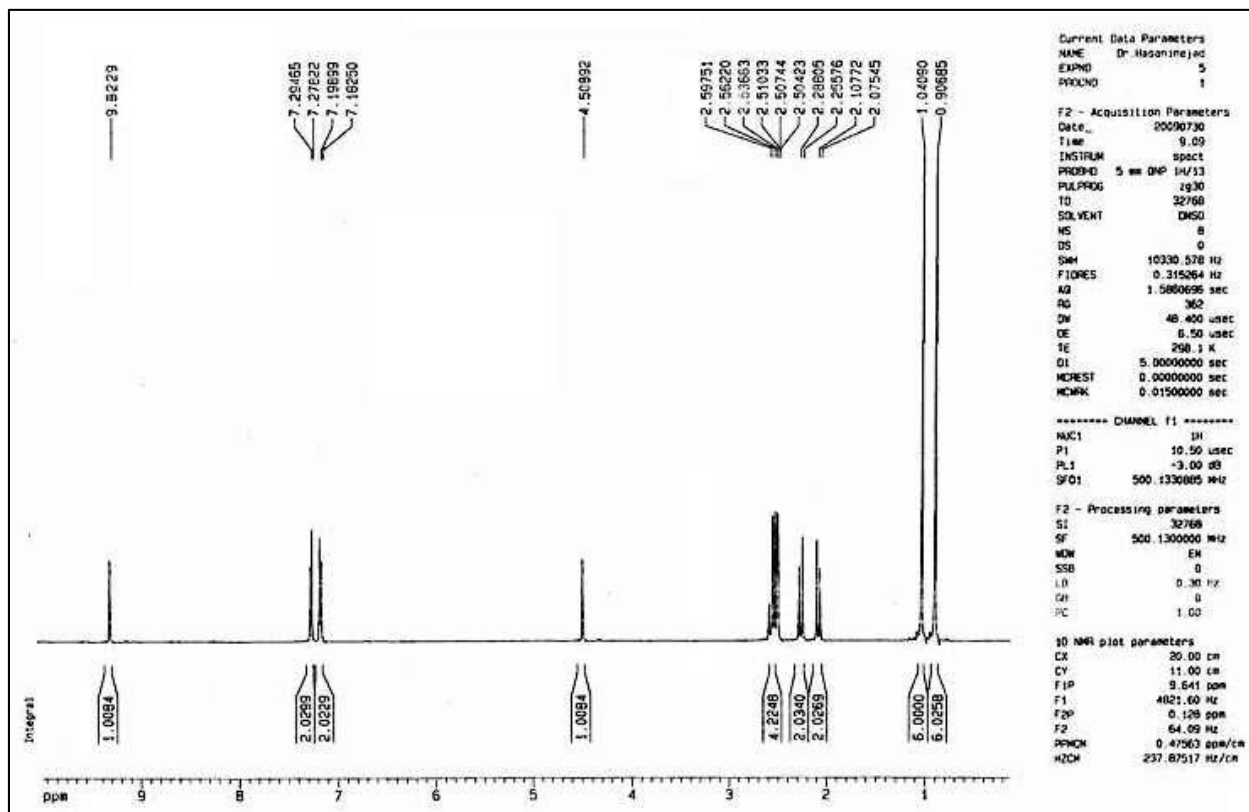

**Fig. 12.**  $^1\text{H NMR}$  of (8f).



**9-(4-bromophenyl)-3,3,6,6-tetramethyl-3,4,6,7,9,10-hexahydroacridine-1,8(2H,5H)-dione (8h)**

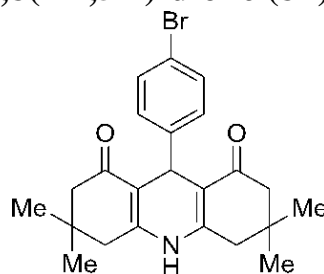

M. P.: 308-311 °C; FT-IR (KBr,  $\text{Cm}^{-1}$ )  $\nu_{\text{max}}$ : 3274, 3176, 3058, 2954, 2921, 1649, 1608, 1491, 1364, 1221, 1171.  $^1\text{H}$  NMR (400 MHz, DMSO):  $\delta$ : 1.03 (s, 6H), 1.23 (s, 6H), 2.24-2.30 (dd,  $J=14.8, 8.8$  Hz, 4H), 2.44 (s, 4H), 4.84 (s, 1H), 7.16 (d,  $J=6.8$  Hz, 2H), 7.43 (d,  $J=17.6$  Hz, 2H), 9.30 (s, 1H). Anal. Calc. for  $\text{C}_{23}\text{H}_{26}\text{BrNO}_2$ ; C 64.49, H 6.12, N 3.27, O 7.47; Found: C 64.52, H 6.17, N 3.31, O 7.49.

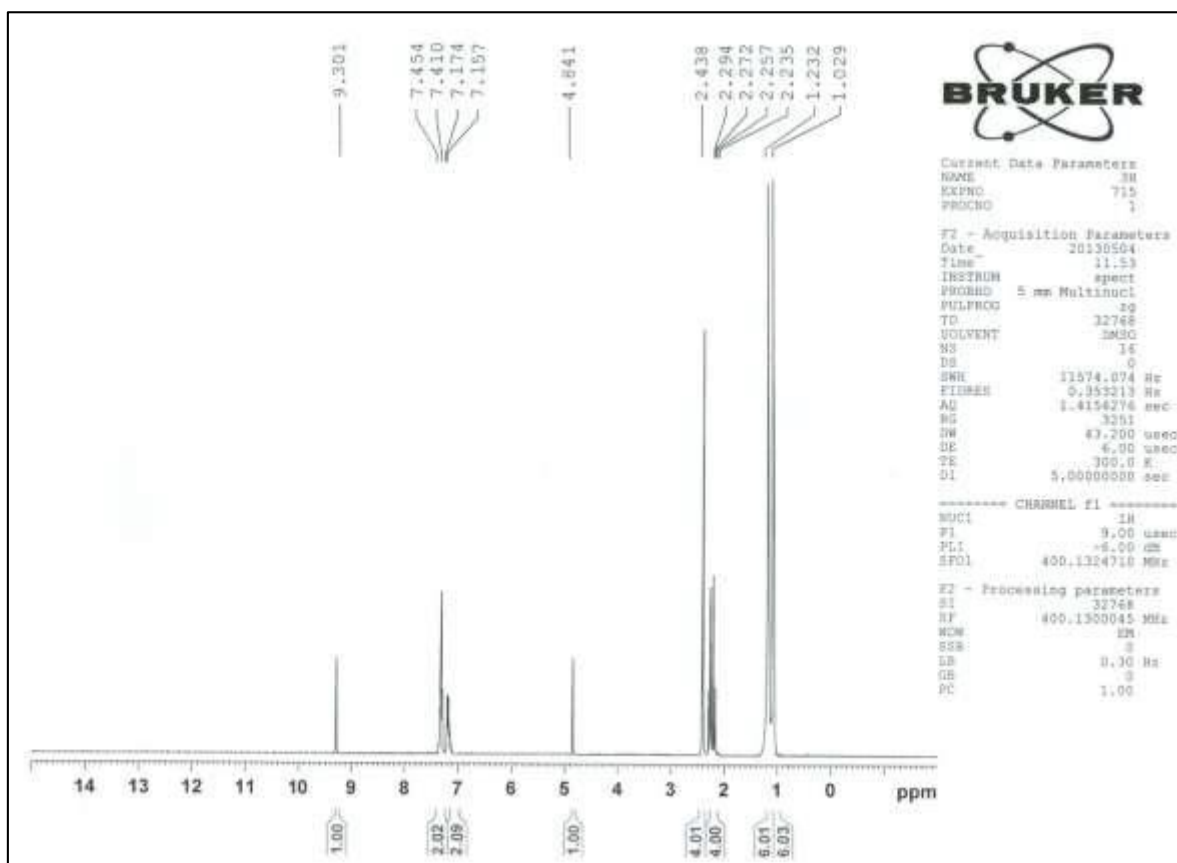

**Fig. 13.**  $^1\text{H}$  NMR of (8h).

**3,3,6,6-tetramethyl-9-(4-nitrophenyl)-3,4,6,7,9,10-hexahydroacridine-1,8(2H,5H)-dione (8i)**

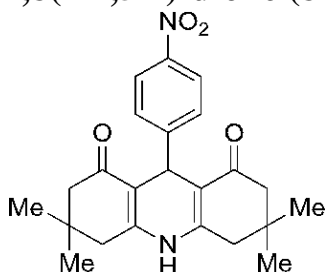

M. P.: 312-314 °C; FT-IR (KBr,  $\text{cm}^{-1}$ )  $\nu_{\text{max}}$ : 3384, 2958, 2908, 1643, 1602, 1514, 1447, 1364, 1221, 1171.  $^1\text{H}$  NMR (500 MHz, DMSO)  $\delta$ : 0.91 (s, 6H), 1.05 (s, 6H), 2.08-2.11 (d,  $J=6.5$  Hz, 2H), 2.27-2.30 (d,  $J=6.5$  Hz, 2H), 2.50-2.63 (m, 4H), 4.63 (s, 1H), 7.45-7.48 (m, 2H), 8.10-8.12 (m, 2H), 9.32 (s, 1H). Anal. Calc. for  $\text{C}_{23}\text{H}_{26}\text{N}_2\text{O}_4$ ; C 70.03, H 6.64, N 7.10, O 16.22; Found: C 70.08, H 6.69, N 7.07, O 16.26.

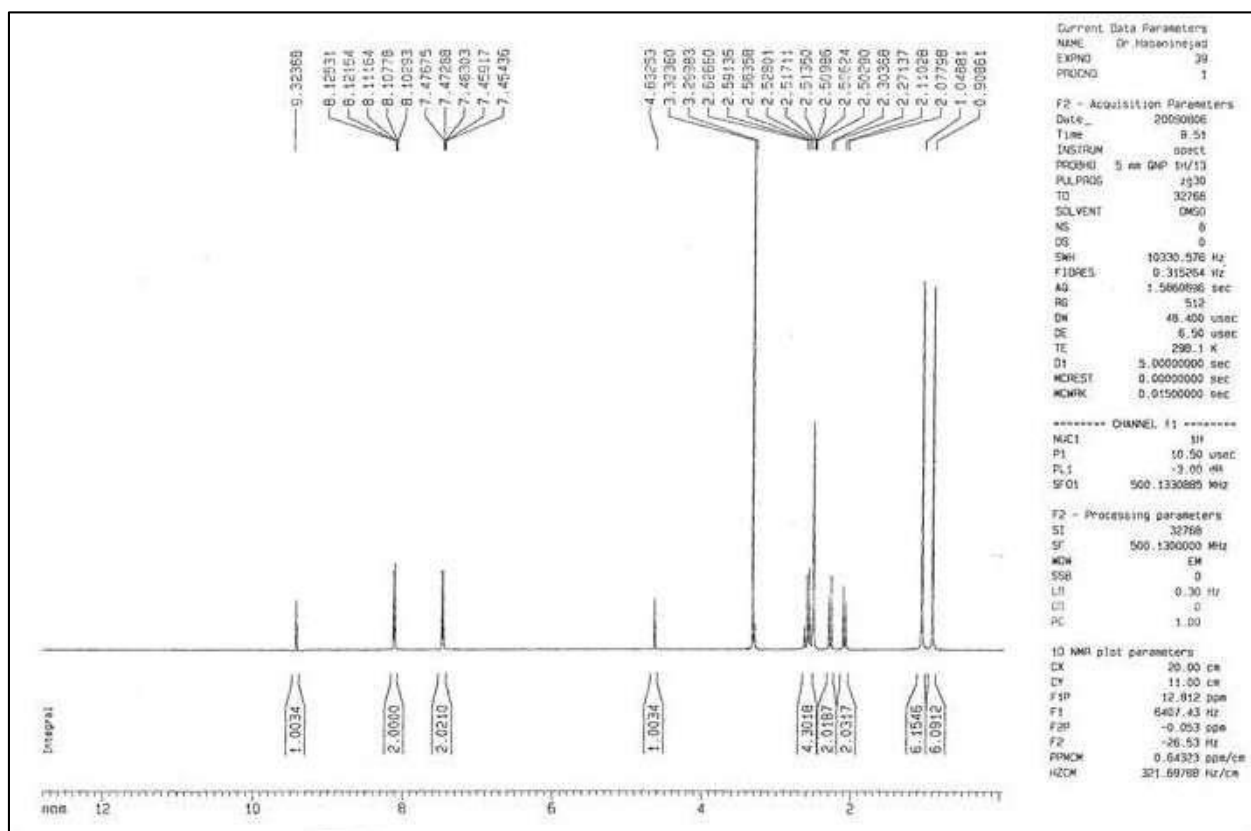

**Fig. 14.**  $^1\text{H}$  NMR of (8i).

**3,3,6,6-tetramethyl-9-(3-nitrophenyl)-3,4,6,7,9,10-hexahydroacridine-1,8(2H,5H)-dione (8j)**

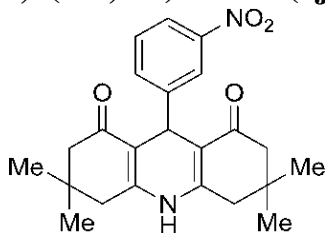

M. P.: 292-294 °C; FT-IR (KBr,  $\text{Cm}^{-1}$ )  $\nu_{\text{max}}$ : 3282, 3193, 3070, 2957, 2930, 2889, 2870, 1649, 1612, 1577, 1434, 1364, 1225, 1171.  $^1\text{H}$  NMR (500 MHz, DMSO):  $\delta$ : 0.91 (s, 6H), 1.05 (s, 6H), 2.09-2.12 (d,  $J=4.4$  Hz, 2H), 2.27-2.30 (d,  $J=6.4$  Hz, 2H), 2.55-2.63 (dd,  $J=7.2$  Hz, 4H), 4.64 (s, 1H), 7.55-7.58 (t,  $J=3.1$  Hz, 1H), 7.65-7.67 (d,  $J=3$  Hz, 1H), 7.99-8.02 (d,  $J=5.1$  Hz, 2H), 9.31 (s, 1H). Anal. Calc. for  $\text{C}_{23}\text{H}_{26}\text{N}_2\text{O}_4$ ; C 70.03, H 6.64, N 7.10, O 16.22; Found: C 70.06, H 6.70, N 7.08, O 16.24.

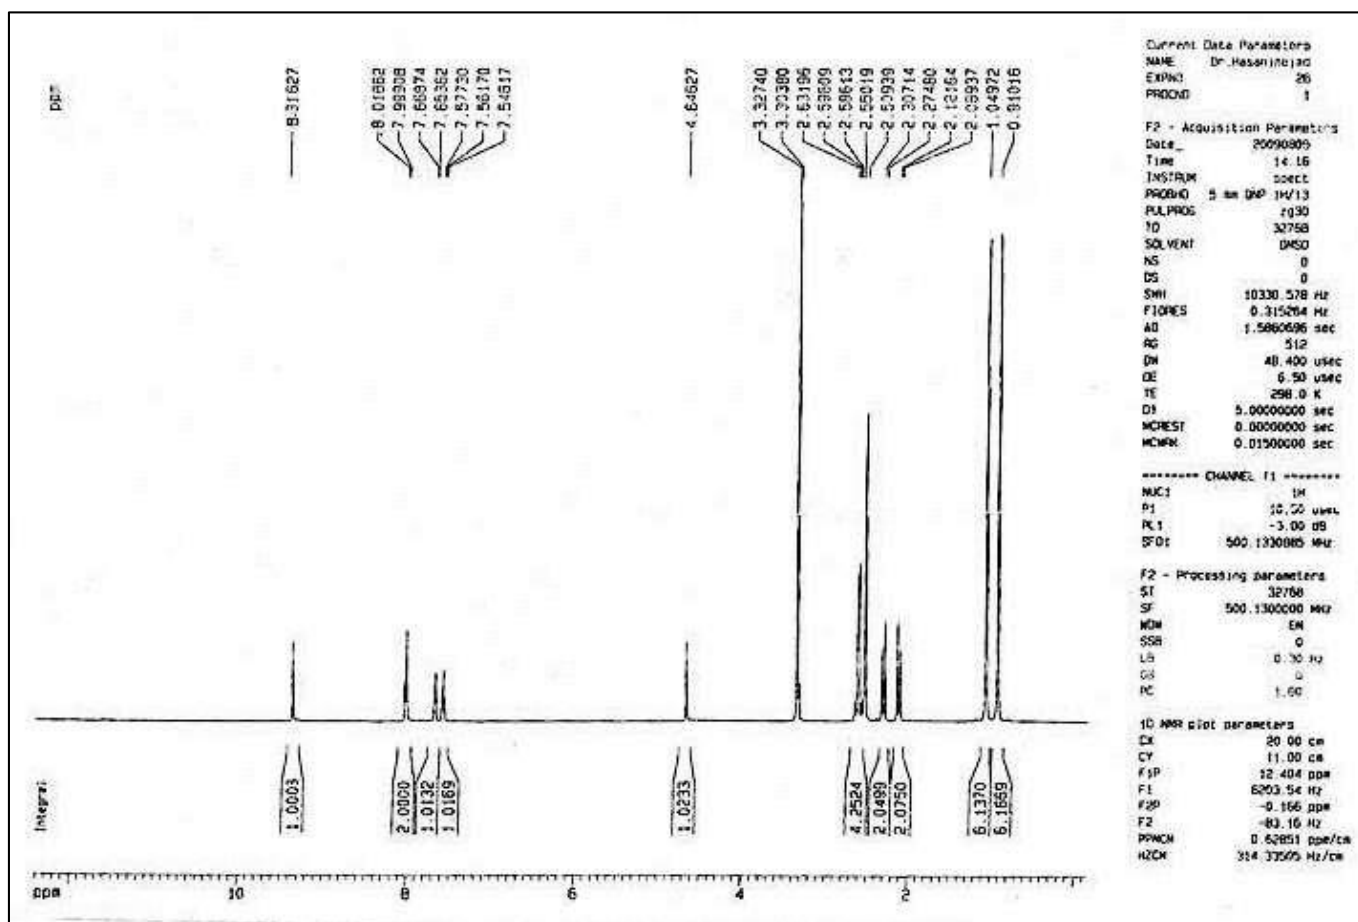

Fig. 15.  $^1\text{H}$  NMR of (8j).

Ethyl 2-methyl-5-oxo-4-phenyl-4,6,7,8-tetrahydro-1H-quinoline-3-carboxylate (10a)

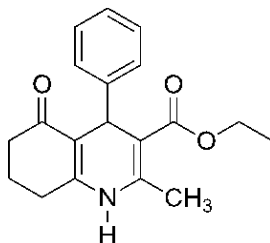

M.p. 239-241 °C (KBr,  $\text{Cm}^{-1}$ )  $\nu_{\text{max}}$ : 3296 (NH), 1641 (C=O) (acid), 1608 (C=O) (ketone), 1488 ( $\text{OC}_2\text{H}_5$ ) (ester)  $\text{cm}^{-1}$ ;  $\delta/\text{ppm}$  (300 MHz,  $\text{CDCl}_3$ -*d*) 1.17 (t, 3H,  $\text{CH}_3$ - $\text{CH}_2$ -C=O), 1.59 (m, 2H,  $\text{CH}_2$ - $\text{CH}_2$ - $\text{CH}_2$ ), 1.97 (m, 3H,  $\text{CH}_3$ -Ph), 2.30-2.46 (m, 4H,  $\text{CH}_2$ - $\text{CH}_2$ ), 4.05 (q, 2H, -O- $\text{CH}_2$ - $\text{CH}_3$ ), 5.01 (s, 1H, CH-Ph), 5.94 (s, 1H, NH), 7.08-7.31 (m, 5H, CH (Ph)).

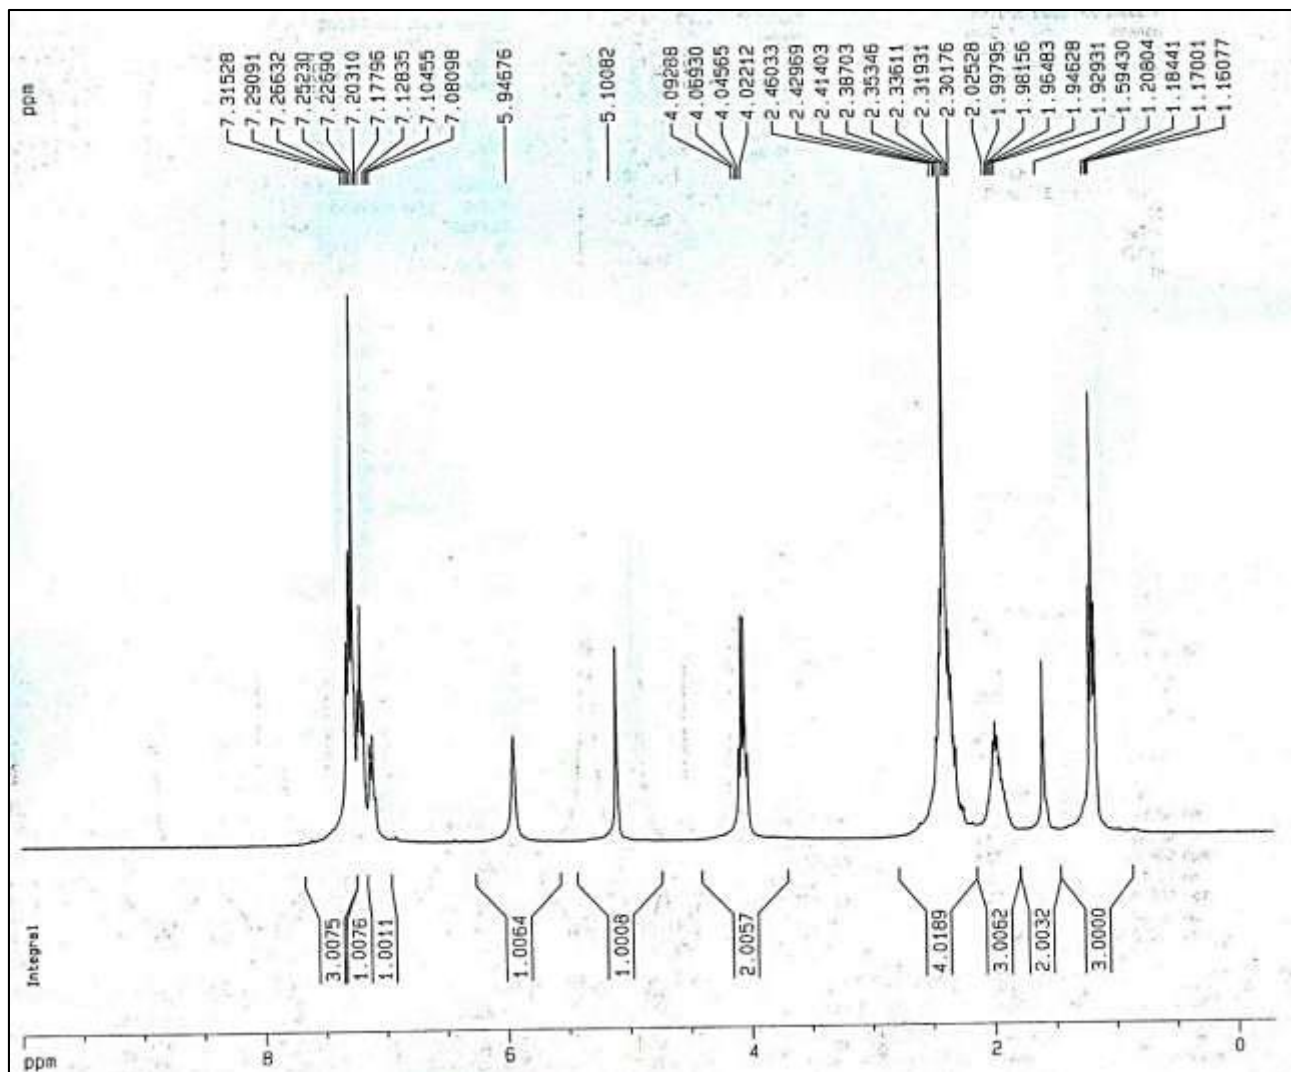

Fig. 16.  $^1\text{H}$ NMR of (10a).

**Ethyl 2,7,7-trimethyl-5-oxo-4-phenyl-1,4,5,6,7,8-hexahydroquinoline-3-carboxylate (11a)**

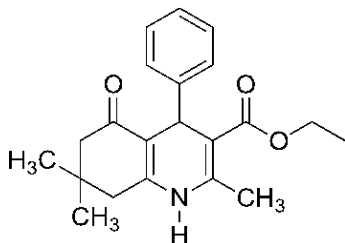

M.p. 210-211 °C, (KBr,  $\text{Cm}^{-1}$ )  $\nu_{\text{max}}$ : 3275 (NH), 3080 (CH), 1700 (C=O) (acid), 1610 (C=O) (ketone), 1480 ( $\text{OC}_2\text{H}_5$ ) (ester), 1225 ( $\text{OCH}_3$ ) (ether)  $\text{cm}^{-1}$ ;  $\delta\text{H}$ / ppm (400 MHz,  $\text{CDCl}_3$ -*d*) 0.94 (s, 3H,  $\text{CH}_3$ ), 1.08 (s, 3H,  $\text{CH}_3$ ), 1.19-1.23 (t,  $J = 6.8$  Hz, 3H,  $\text{CH}_3$ - $\text{CH}_2$ -C=O), 2.14-2.35 (m, 4H, ), 4.05-4.10 (q,  $J = 7.2$ , 2H, -O- $\text{CH}_2$ - $\text{CH}_3$ ), 5.05 (s, 1H, CH-Ph), 6.42 (s, 1H, NH), 7.09-7.13 (t,  $J = 7.2$ , 1H, CH (Ph)), 7.19-7.23 (t,  $J = 7.2$ , 2H, CH (Ph)), 7.28-7.33 (m, 2H, CH (Ph));  $\delta\text{C}$  /ppm (100 MHz,  $\text{CDCl}_3$ ) 195.67, 167.5, 148.5, 147.06, 143.4, 128.02, 127.88, 126.03, 112.08, 106.05, 50.73, 40.9, 36.6, 32.7, 29.45, 27.14, 19.34, 14.21.

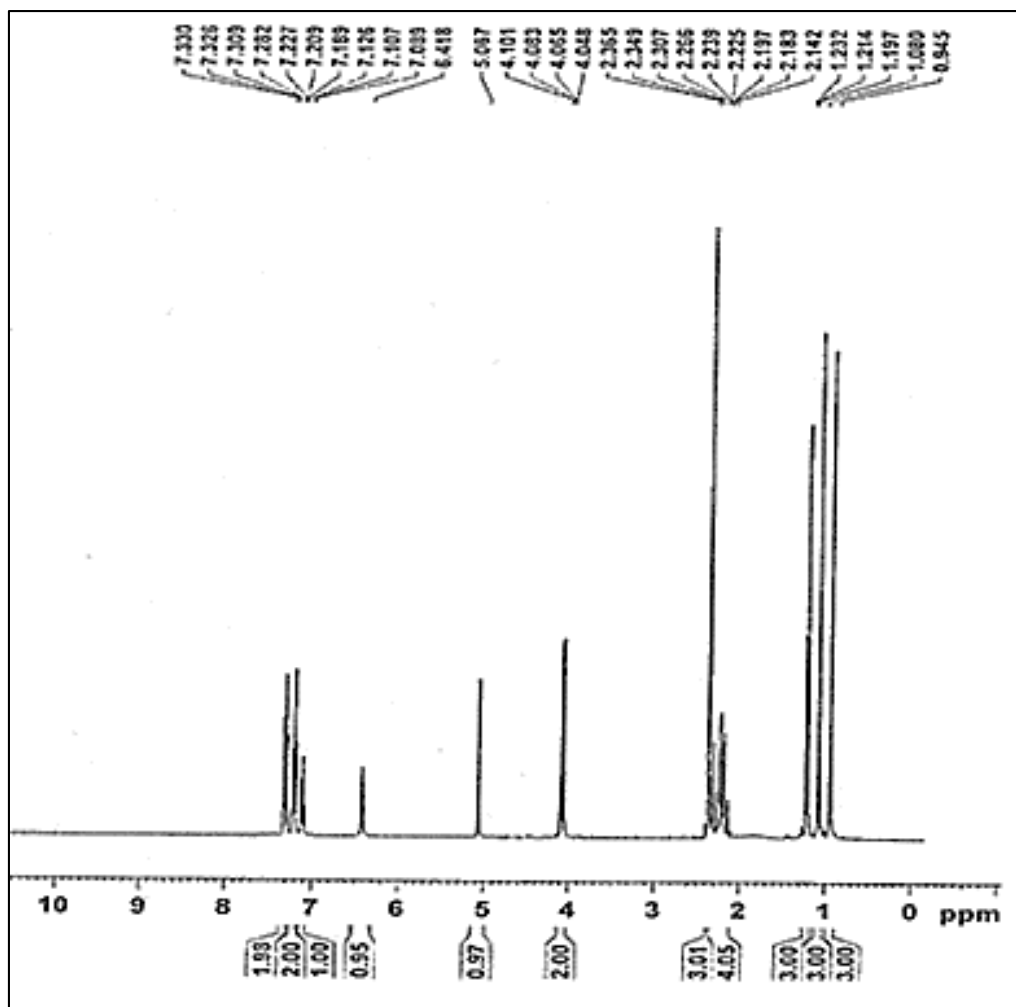

**Fig. 17.**  $^1\text{H}$  NMR of (11a).

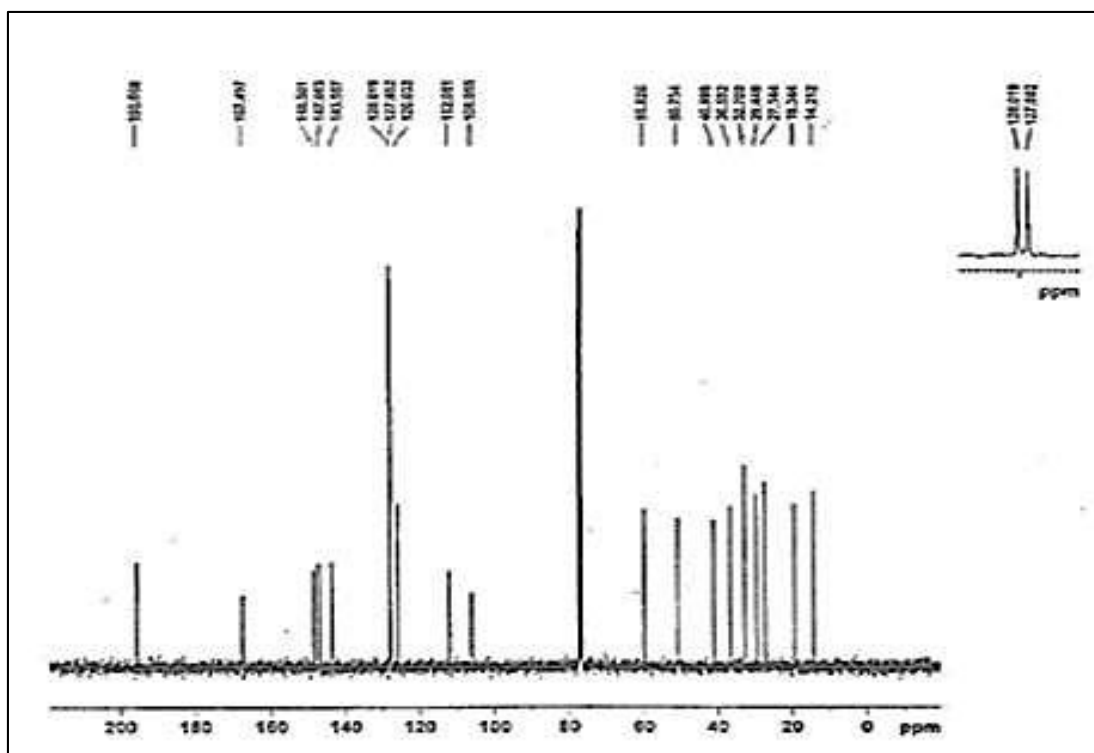

Fig. 18.  $^{13}\text{C}$  NMR of (11a).

**Ethyl 2,7,7-trimethyl-4-(4-nitrophenyl)-5-oxo-1,4,5,6,7,8-hexahydroquinoline-3-carboxylate (11d)**

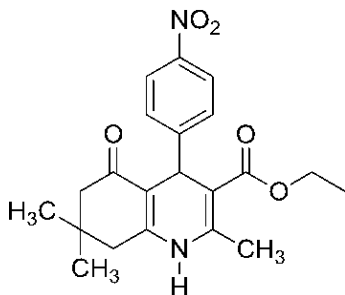

M.p. 207-209 °C, (KBr,  $\text{Cm}^{-1}$ )  $\nu_{\text{max}}$ : 3278 (NH), 3076 (CH), 1690 (C=O) (acid), 1615 (C=O) (ketone), 1482 ( $\text{OC}_2\text{H}_5$ ) (ester), 1218 ( $\text{OCH}_3$ ) (ether)  $\text{cm}^{-1}$ ;  $\delta\text{H}$ /ppm (400 MHz,  $\text{CDCl}_3$ -*d*) 0.77 (s, 3H,  $\text{CH}_3$ ), 0.96 (s, 3H,  $\text{CH}_3$ ), 1.04-1.09 (t,  $J=9.6$  Hz, 3H,  $\text{CH}_3$ - $\text{CH}_2$ -C=O), 1.90-2.22 (m, 2H, C- $\text{CH}_2$ -C=), 2.28 (s, 3H,  $\text{CH}_3$ ), 2.38 (s, 1H), 2.43-2.46 (t,  $J=2$ , 1H), 3.30 (s, 1H), 3.88-3.95 (q,  $J=9.6$ , 2H, -O- $\text{CH}_2$ - $\text{CH}_3$ ), 4.93 (s, 1H, CH-Ph), 7.36-7.39 (d,  $J=11.6$ , 2H, CH (Ph)), 8.04-8.07 (d,  $J=20.4$ , 2H, CH (Ph)), 9.19 (s, 1H, NH);  $\delta\text{C}$ /ppm (100 MHz,  $\text{CDCl}_3$ ) 194.32, 166.48, 161.96, 155.07, 150.17, 146.24, 145.73, 128.84, 123.24, 109.11, 102.46, 59.33, 50.14, 36.71, 32.22, 29.08, 26.52, 18.42, 14.16.

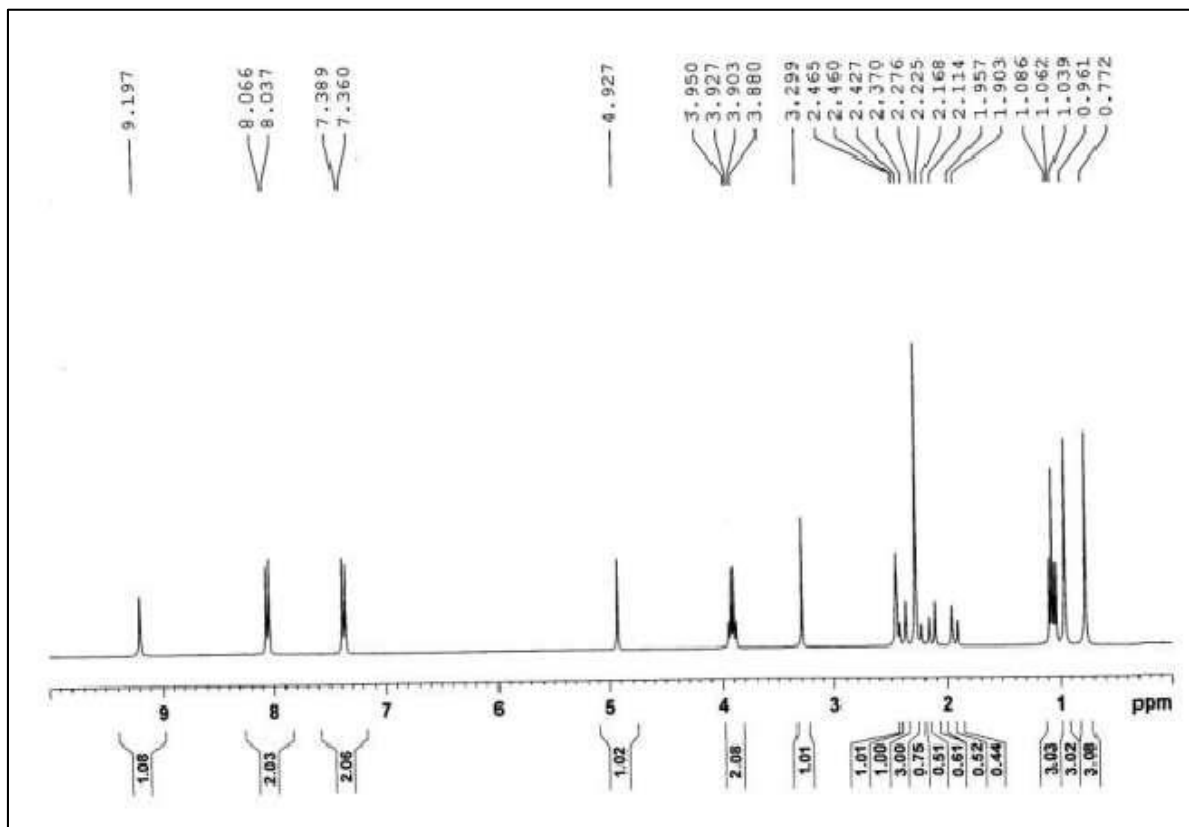

**Fig. 19.**  $^1\text{H}$  NMR of (11d).

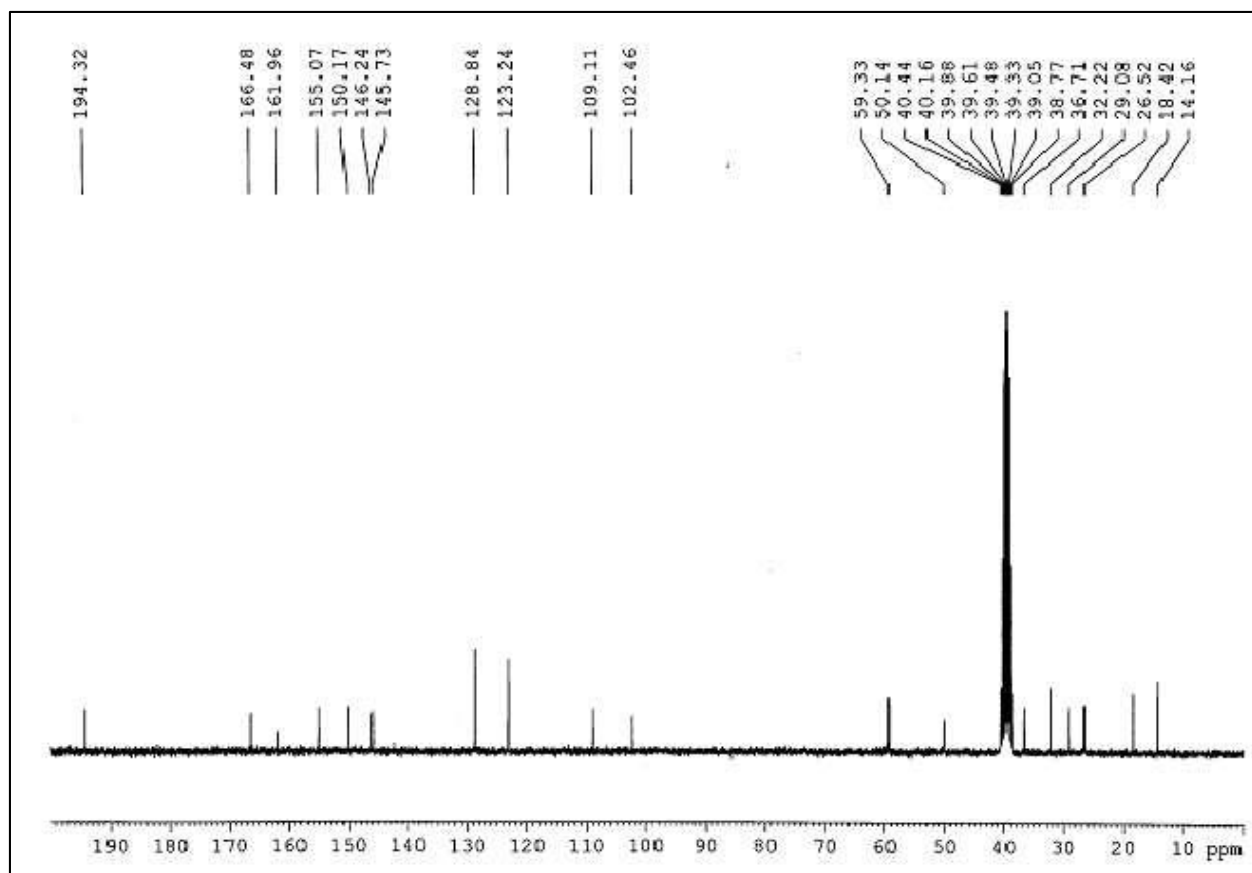

Fig. 20.  $^{13}\text{C}$  NMR of (11d).



**Ethyl 4-(4-chlorophenyl)-2,7,7-trimethyl-5-oxo-1,4,5,6,7,8-hexahydroquinoline-3-carboxylate (11f)**

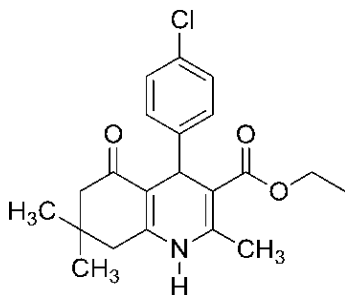

M.p. 243-245 °C, (KBr,  $\text{Cm}^{-1}$ )  $\nu_{\text{max}}$ : 3275 and 3196 (NH), 3080 and 2963 (CH), 1711 (C=O) (acid), 1605 (C=O) (ketone), 1480 ( $\text{OC}_2\text{H}_5$ ) (ester), 1221 ( $\text{OCH}_3$ ) (ether)  $\text{cm}^{-1}$ ;  $\delta\text{H}/\text{ppm}$  (400 MHz,  $\text{CDCl}_3$ -*d*) 0.94 (s, 3H,  $\text{CH}_3$ ), 1.09 (s, 3H,  $\text{CH}_3$ ), 1.19-1.22 (t,  $J=7.2$  Hz, 3H,  $\text{CH}_3\text{-CH}_2\text{-C=O}$ ), 2.14-2.36 (m, 4H,  $\text{C-CH}_2\text{-C=}$ ), 2.39 (s, 3H,  $\text{N-C-CH}_3$ ), 4.04-4.09 (q,  $J=7.2$  Hz, 2H,  $-\text{O-CH}_2\text{-CH}_3$ ), 5.04 (s, 1H,  $\text{CH-Ph}$ ), 6.12 (s, 1H, NH), 7.16-7.28 (m, 4H, CH (Ph));  $\delta\text{C}/\text{ppm}$  (100 MHz,  $\text{CDCl}_3$ ) 195.49, 167.22, 148.12, 145.56, 143.62, 131.59, 129.45, 128.0, 111.90, 105.76, 59.92, 50.86, 41.08, 36.21, 32.72, 29.43, 27.11, 19.46, 14.21.

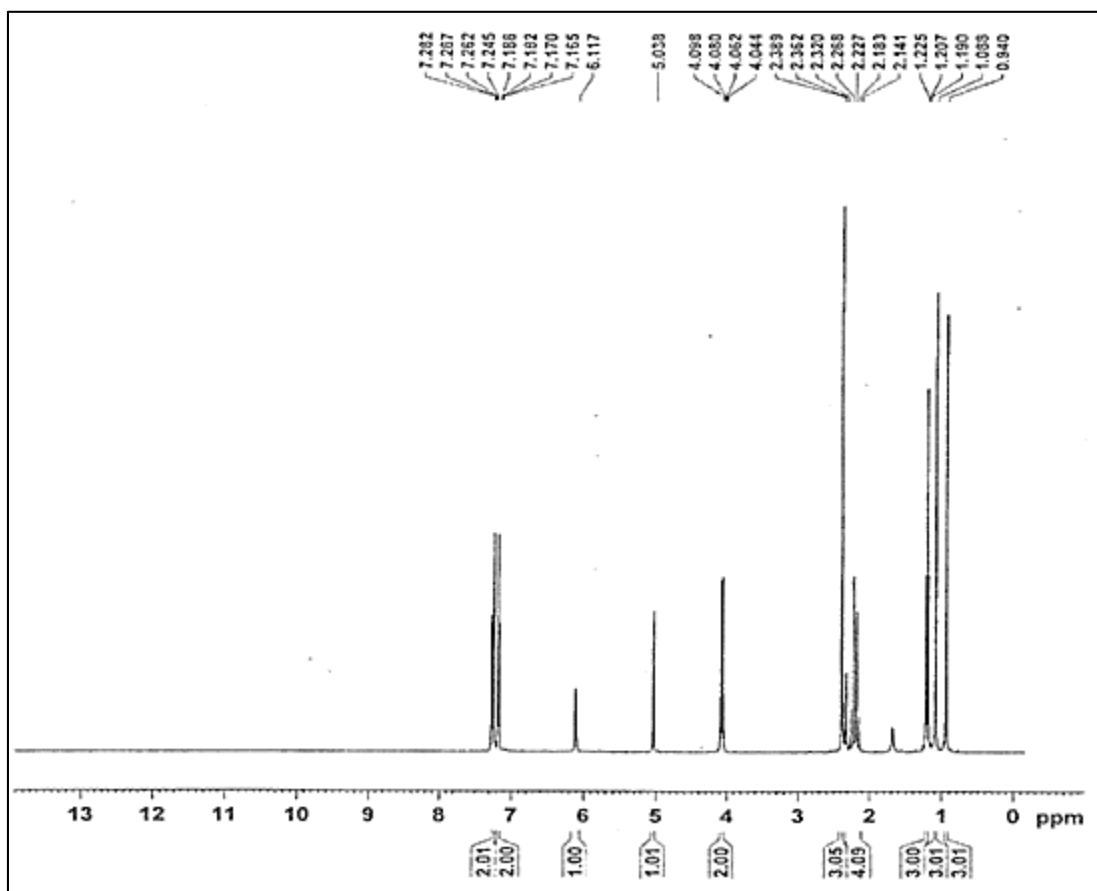

**Fig. 21.**  $^1\text{H}$  NMR of (11f).

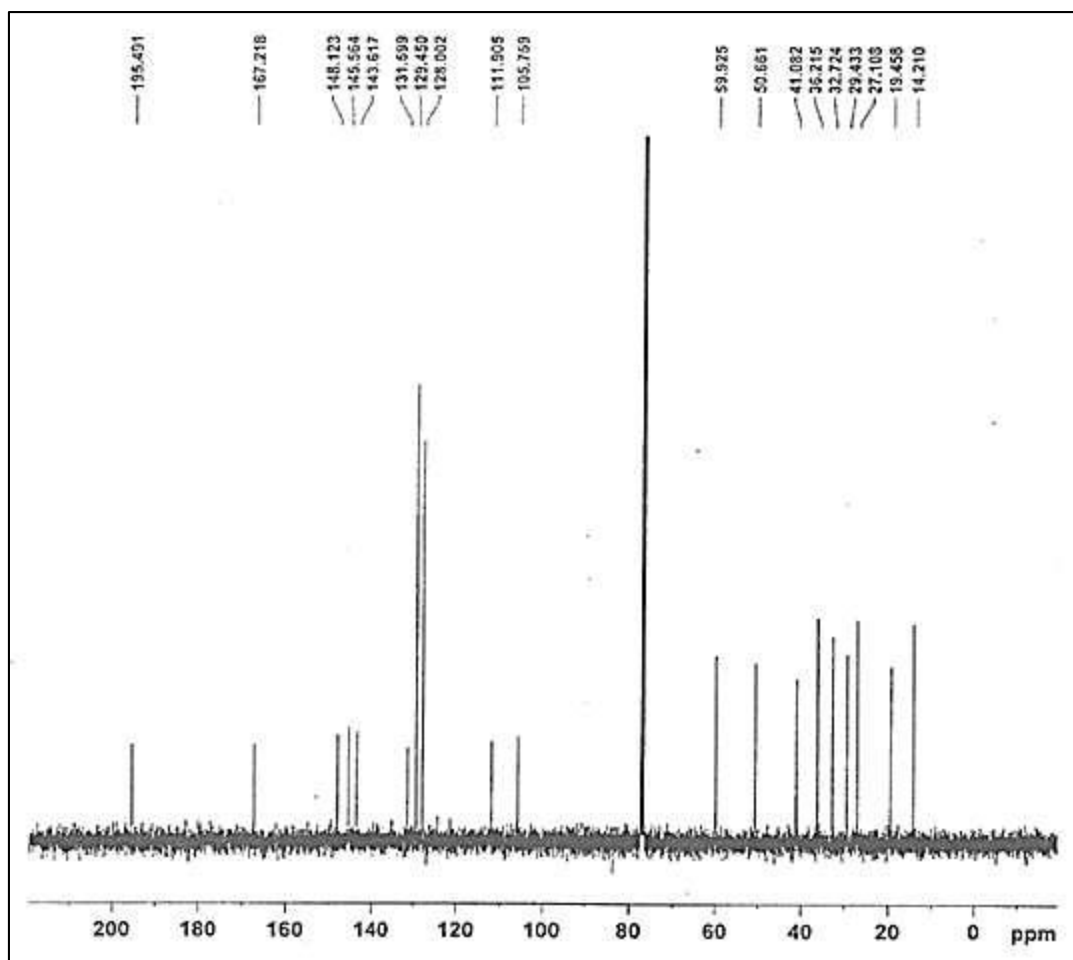

**Fig. 22.**  $^{13}\text{C}$  NMR of (11f).

**Ethyl 4-(4-methoxyphenyl)-2,7,7-trimethyl-5-oxo-1,4,5,6,7,8-hexahydroquinoline-3-carboxylate (11j)**

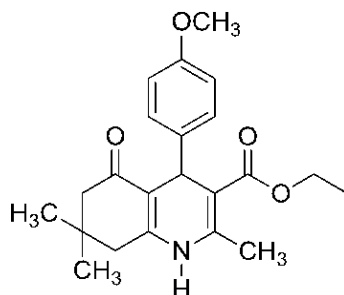

M.p. 255-256 °C, (KBr,  $\text{Cm}^{-1}$ )  $\nu_{\text{max}}$ : 3286 and 3112 (NH), 3080 and 2963 (CH), 1695 (C=O) (acid), 1615 (C=O) (ketone), 1498 ( $\text{OC}_2\text{H}_5$ ) (ester), 1220 ( $\text{OCH}_3$ ) (ether)  $\text{cm}^{-1}$ ;  $\delta\text{H}$ /ppm (400 MHz,  $\text{CDCl}_3$ -*d*) 0.97 (s, 3H,  $\text{CH}_3$ ), 1.09 (s, 3H,  $\text{CH}_3$ ), 1.21-1.24 (t,  $J = 7.2$  Hz, 3H,  $\text{CH}_3\text{-CH}_2\text{-C=O}$ ), 2.15-2.37 (m, 4H,  $\text{C-CH}_2\text{-C=}$ ), 2.39 (s, 3H,  $\text{N-C-CH}_3$ ), 3.75 (s, 3H,  $\text{H}_3\text{C-O-Ph}$ ), 4.05-4.10 (q,  $J = 7.2$  Hz, 2H,  $-\text{O-CH}_2\text{-CH}_3$ ), 5.01 (s, 1H,  $\text{CH-Ph}$ ), 5.94 (s, 1H, NH), 6.73-6.77 (m, 2H,  $\text{CH-Ar}$ ), 7.21-7.28 (m, 2H,  $\text{CH-Ar}$ );  $\delta\text{C}$  /ppm (100 MHz,  $\text{CDCl}_3$ ) 195.52, 167.49, 157.75, 147.79, 142.99, 139.53, 128.98, 113.24, 112.45, 106.45, 59.83, 55.13, 50.66, 41.17, 35.67, 32.75, 29.43, 27.20, 19.49, 14.24.

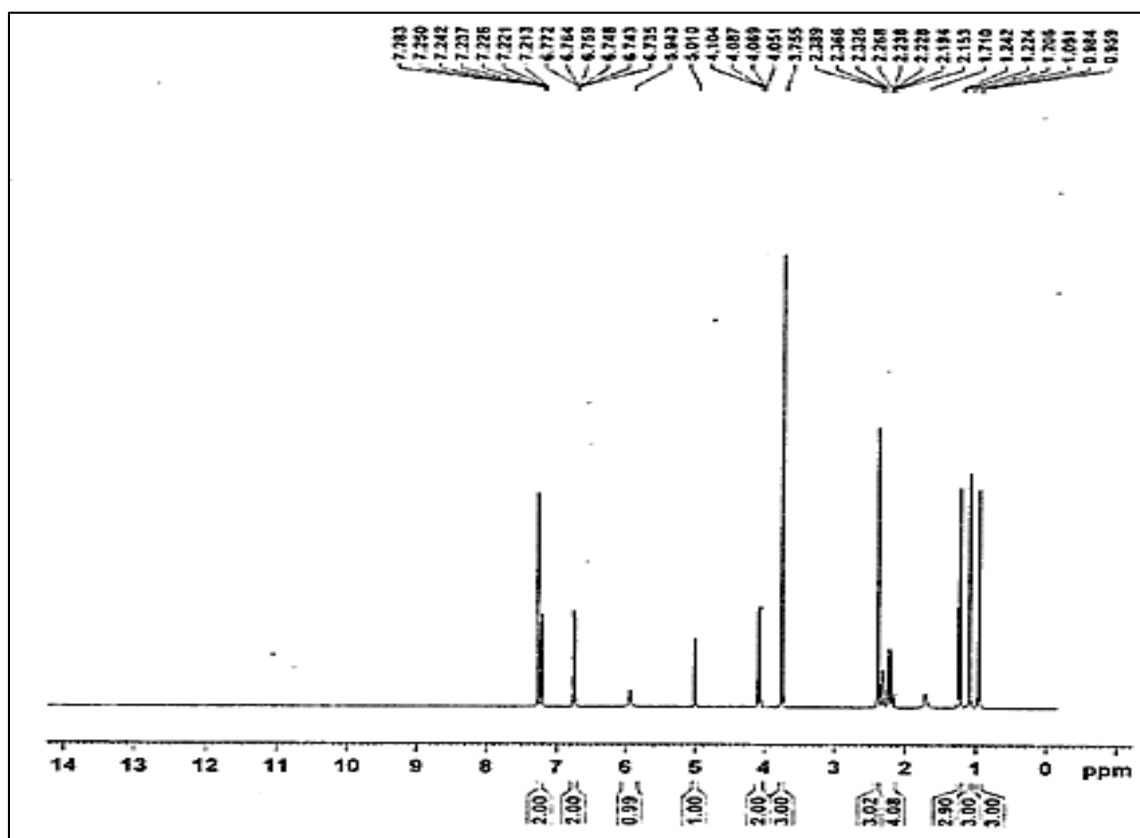

**Fig. 23.**  $^1\text{H}$  NMR of (11j).

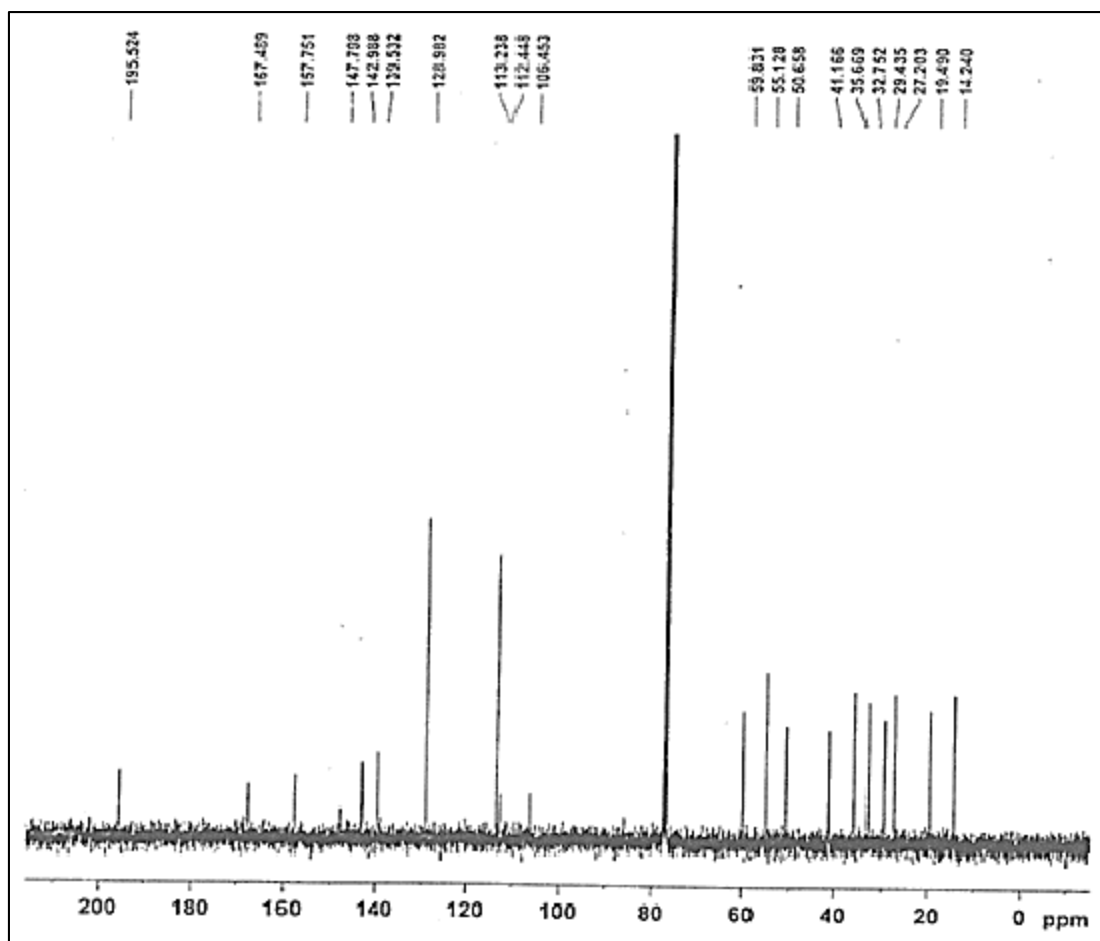

Fig. 24.  $^{13}\text{C}$  NMR of (11j).

**Ethyl 2,7,7-trimethyl-5-oxo-4-(p-tolyl)-1,4,5,6,7,8-hexahydroquinoline-3-carboxylate (11k)**

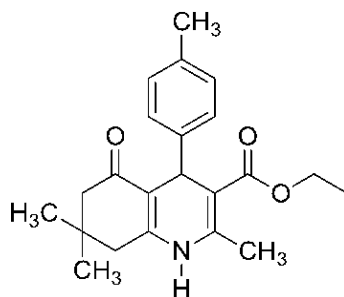

M.p. 283-284 °C, (KBr,  $\text{Cm}^{-1}$ )  $\nu_{\text{max}}$ : 3275 and 3207 (NH), 3085 and 2963 (CH), 1700 (C=O) (acid), 1610 (C=O) (ketone), 1494 ( $\text{OC}_2\text{H}_5$ ) (ester), 1222 ( $\text{OCH}_3$ ) (ether)  $\text{cm}^{-1}$ ;  $\delta\text{H}/\text{ppm}$  (400 MHz,  $\text{CDCl}_3$ -*d*) 0.96 (s, 3H,  $\text{CH}_3$ ), 1.08 (s, 3H,  $\text{CH}_3$ ), 1.21-1.25 (t,  $J=7.2$  Hz, 3H,  $\text{CH}_3\text{-CH}_2\text{-C=O}$ ), 2.14-2.24 (m, 3H,  $\text{C-CH}_2\text{-C=}$ ), 2.27 (s, 3H,  $\text{N-C-CH}_3$ ), 2.29-2.33 (t,  $J=7.6$  Hz, 1H,  $\text{C-CH}_2\text{-C=}$ ), 2.36 (s, 3H,  $\text{H}_3\text{C-Ph}$ ), 4.05-4.10 (m, 2H,  $-\text{O-CH}_2\text{-CH}_3$ ), 5.02 (s, 1H,  $\text{CH-Ph}$ ), 6.18 (s, 1H, NH), 7.00-7.02 (d,  $J=7.6$  Hz, 2H,  $\text{CH-Ar}$ ), 7.19-7.21 (d,  $J=8$  Hz, 2H,  $\text{CH-Ar}$ );  $\delta\text{C}/\text{ppm}$  (100 MHz,  $\text{CDCl}_3$ ) 195.64, 167.53, 148.15, 144.15, 143.27, 135.40, 128.61, 127.88, 112.28, 106.25, 59.83, 50.73, 41.1, 36.07, 32.72, 29.42, 27.23, 21.05, 19.4, 14.22.

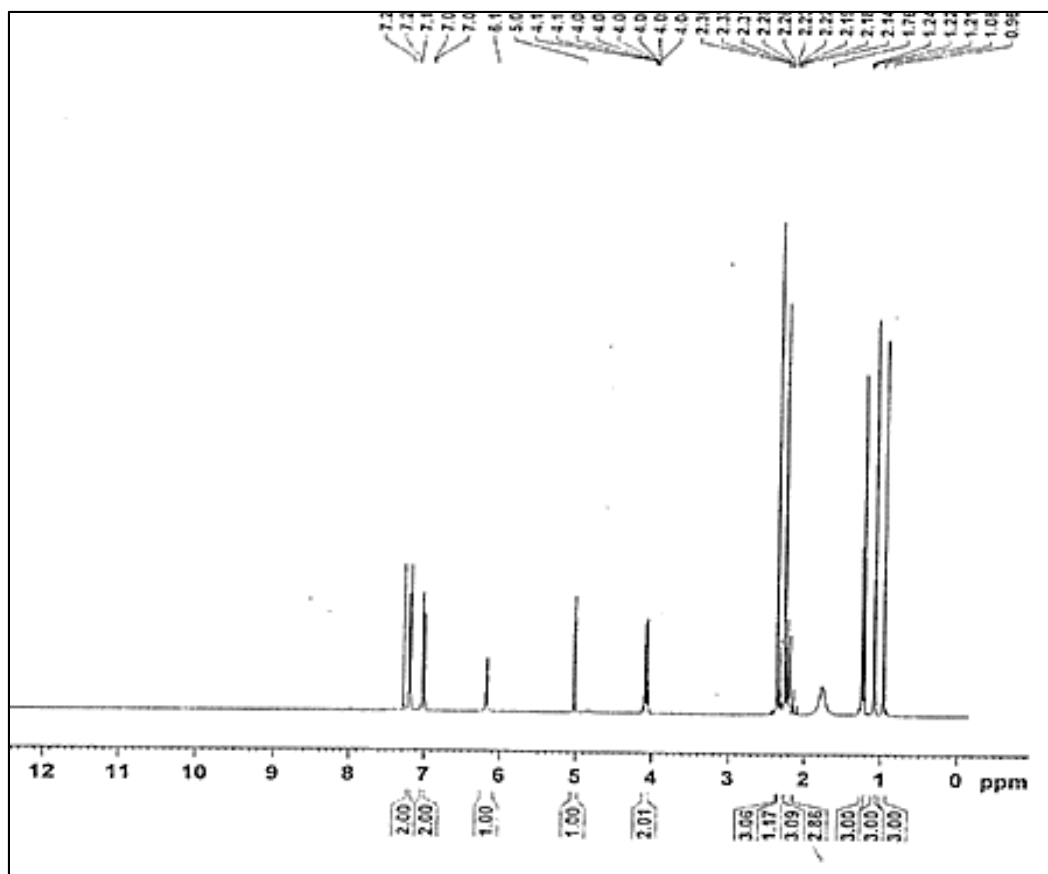

**Fig. 25.**  $^1\text{H}$  NMR of (11k).

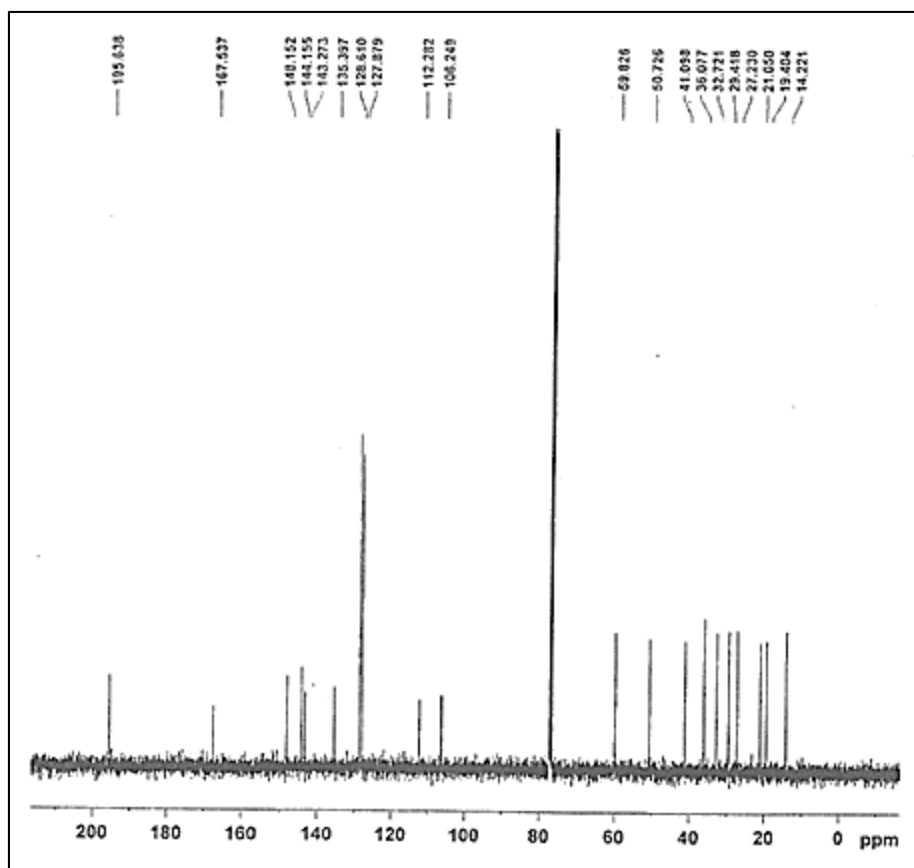

Fig. 26.  $^{13}\text{C}$  NMR of (11k).

**Ethyl 2-methyl-5-oxo-4,7-diphenyl-1,4,5,6,7,8-hexahydroquinoline-3-carboxylate (12a)**

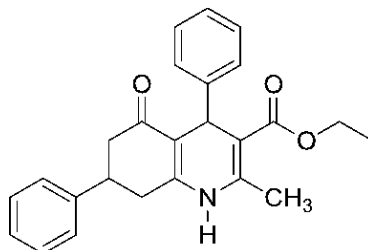

M.p. 213-215 °C, (KBr,  $\text{Cm}^{-1}$ )  $\nu_{\text{max}}$ : 3276 (NH), 1701 (C=O) (acid), 1606 (C=O) (ketone), 1487 ( $\text{OC}_2\text{H}_5$ ) (ester),  $\text{cm}^{-1}$ ;  $\delta_{\text{H}}$  (400 MHz,  $\text{DMSO-}d_6$ ) 1.14 (t, 3H,  $\text{CH}_3\text{-CH}_2\text{-O-C=O}$ ), 2.32 (s, 3H,  $\text{CH}_3$ ), 2.35 (dd, 1H, 8 H), 2.5 (d, 1H, 8 H), 2.59 (m, 1H, 7 H), 2.68 (dd, 1H, 6 H), 2.79 (dd, 1H, 6 H), 3.17 (s, 1H, NH), 4.0 (q, 2H,  $\text{-O-CH}_2\text{-CH}_3$ ), 4.98 (s, 1H, 4 H), 7.11 (m, 1H, 4'H), 7.19-7.24 (q, 5H, 2', 4', 6', 2'', 6''H), 7.3-7.36 (m, 4H, 3', 5', 3'', 5'' H), 9.21 (s, 1H, NH) ppm;  $\delta_{\text{C}}$  (100 MHz,  $\text{DMSO-}d_6$ ) 194.4 (C-5), 167.3 (C= $\text{OOC}_2\text{H}_5$ ), 151.1 (C-2), 148.1 (C-1a), 145.3 (C-1''), 143.9 (C-1'), 128.9 (C-2' and C-6'), 128.3 (C-3' and C-5'), 127.9 (C-3'' and C-5''), 127.4 (C-2'' and C-6''), 127 (C-4''), 126.2 (C-4'), 111.2 (C-5a), 104.2 (C-3), 59.5 (O- $\text{CH}_2\text{-CH}_3$ ), 44.4 (C-6), 38.8 (C-4), 36.2 (C-8), 34 (C-7), 18.7 (1C,  $\text{CH}_3$ ), 14.6 (1C,  $\text{CH}_3\text{-CH}_2\text{O}$ ).

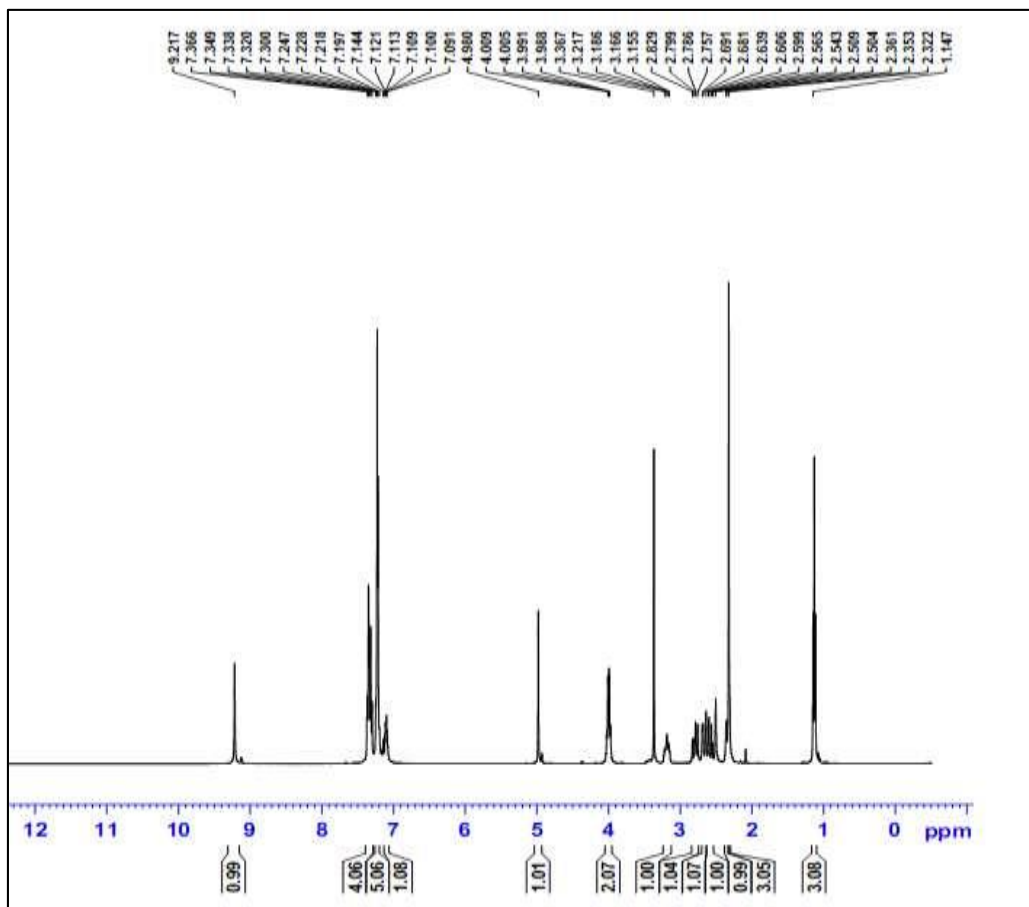

**Fig. 27.**  $^1\text{H}$  NMR of (12a).

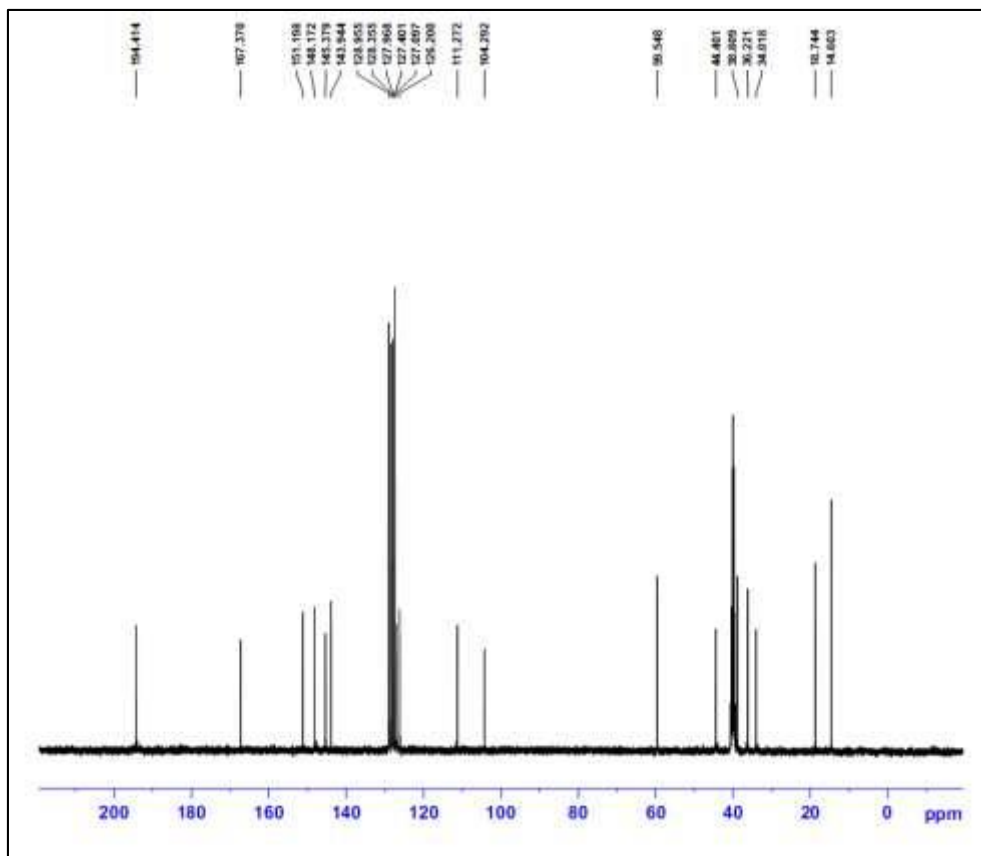

**Fig. 28.**  $^{13}\text{C}$  NMR of (12a).



**Ethyl 4-(p-methoxyphenyl)-2-methyl-5-oxo-7-phenyl-4, 6, 7, 8-tetrahydro-1H-quinoline-3-carboxylate (12b)**

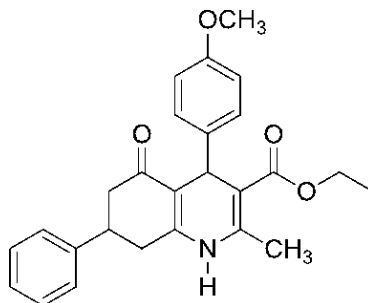

M.p. 236-238 °C, (KBr,  $\text{Cm}^{-1}$ )  $\nu_{\text{max}}$ : 3280 (NH), 1689 (C=O) (acid), 1606 (C=O) (ketone), 1479 (OC<sub>2</sub>H<sub>5</sub>) (ester), 1222 (OCH<sub>3</sub>) (ether)  $\text{cm}^{-1}$ ;  $\delta_{\text{H}}$ / ppm (300 MHz, CDCl<sub>3</sub>-d) 1.27 (m, 3H, CH<sub>3</sub>-CH<sub>2</sub>-C=O), 2.23-2.37 (m, 3H, CH<sub>3</sub>-Ph), 2.38-2.52 (m, 5H, CH<sub>2</sub>-CH-CH<sub>2</sub>), 3.71 (s, 3H, CH<sub>3</sub>-O-Ph), 4.07 (m, 2H, -O-CH<sub>2</sub>-CH<sub>3</sub>), 5.05 (m, 1H, CH-Ph), 6.71-7.12 (m, 4H, CH(p-OMe-Ph)), 6.96 (s, 1H, NH), 7.17-7.29 (m, 5H, CH (Ph));  $\delta_{\text{C}}$  /ppm (75 MHz, CDCl<sub>3</sub>) 195.2, 167.5, 157.8, 150, 149.5, 143.4, 142.6, 139.7, 139.3, 128.8, 127, 126.6, 113.2, 106.2, 59.8, 55.1, 39.5, 38.8, 35.8, 34.4, 19.1, 14.2.

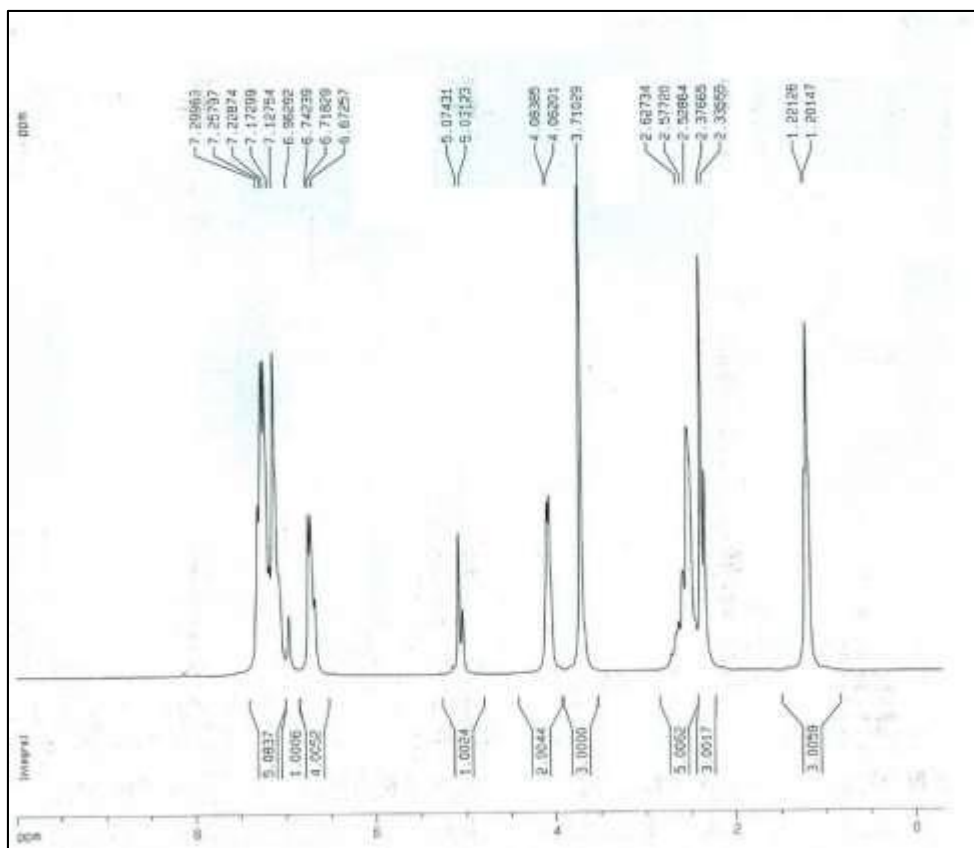

**Fig. 29.** <sup>1</sup>H NMR of (12b).

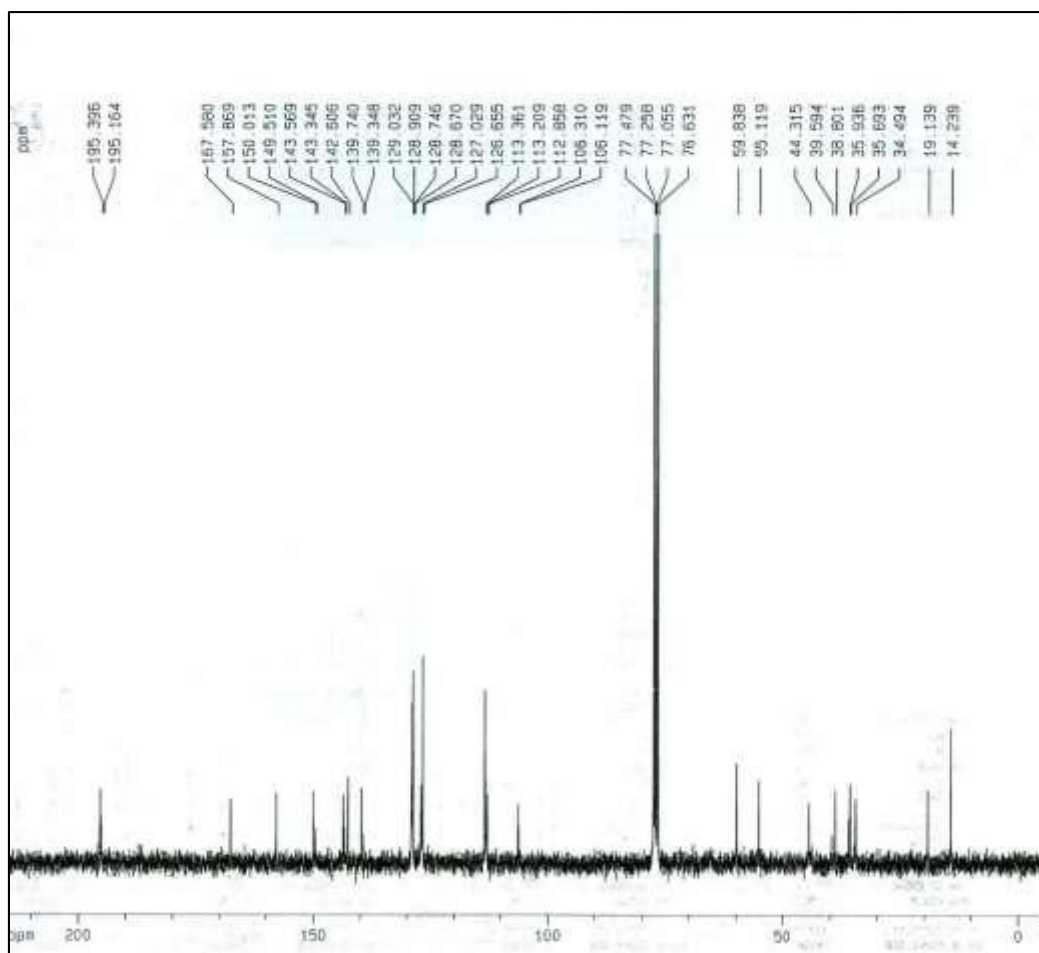

**Fig. 30.**  $^{13}\text{C}$  NMR of (12b).

**Ethyl 4-(4-chlorophenyl)-2-methyl-5-oxo-7-phenyl-1,4,5,6,7,8-hexahydroquinoline-3-carboxylate (12c)**

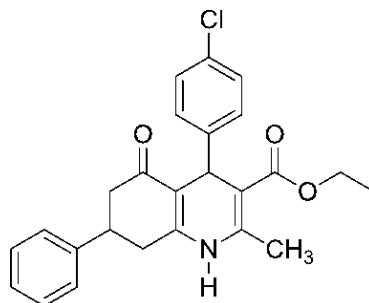

M.p. 190-192 °C, (KBr,  $\text{Cm}^{-1}$ )  $\nu_{\text{max}}$ : 3274 (NH), 1701(C=O) (acid), 1606 (C=O) (ketone), 1487 (OC<sub>2</sub>H<sub>5</sub>) (ester), 848 (C-Cl)  $\text{cm}^{-1}$ ;  $\delta_{\text{H}}$  (400 MHz, DMSO-*d*<sub>6</sub>) 1.12 (t, 3H, CH<sub>3</sub>-CH<sub>2</sub>-O-C=O), 2.3 (t, 1H, 8 H), 2.31 (s, 3H, CH<sub>3</sub>), 2.5 (t, 1H, 8 H), 2.54–2.59 (7, 1H, 8 H), 2.59-2.66 (m, 1H, 6 H), 2.74-2.82 (m, 1H, 6 H), 3.17 (t, 1H, NH), 3.98 (q, 2H, -O-CH<sub>2</sub>-CH<sub>3</sub>), 4.90 (d, 1H, 4 H), 7.22-7.28 (m, 5H, 2', 6', 2'', 4'', 6'' H), 7.31–7.33 (m, 4H, 3', 5', 3'', 5'' H), 9.21 (d, 1H, NH) ppm;  $\delta_{\text{C}}$  (100 MHz, DMSO-*d*<sub>6</sub>) 194.2 (C-5), 167.1 (C=OOC<sub>2</sub>H<sub>5</sub>), 151.3 (C-2), 150.8 (C-1a), 147.1 (C-1''), 145.7 (C-1'), 143.8 (C-4'), 130.7 (C-2' and C-6'), 129.8 (C-3' and C-5'), 128.8 (C-3'' and C-5''), 128.1 (C-2'' and C-6''), 127.1 (C-4''), 111.0 (C-5a), 103.6 (C-3), 44.3 (O-CH<sub>2</sub>-CH<sub>3</sub>), 43.7 (C-6), 38.8 (C-4), 36.0 (C-8), 33.7 (C-7), 18.7 (1C, CH<sub>3</sub>), 14.5 (1C, CH<sub>3</sub>-CH<sub>2</sub>O).

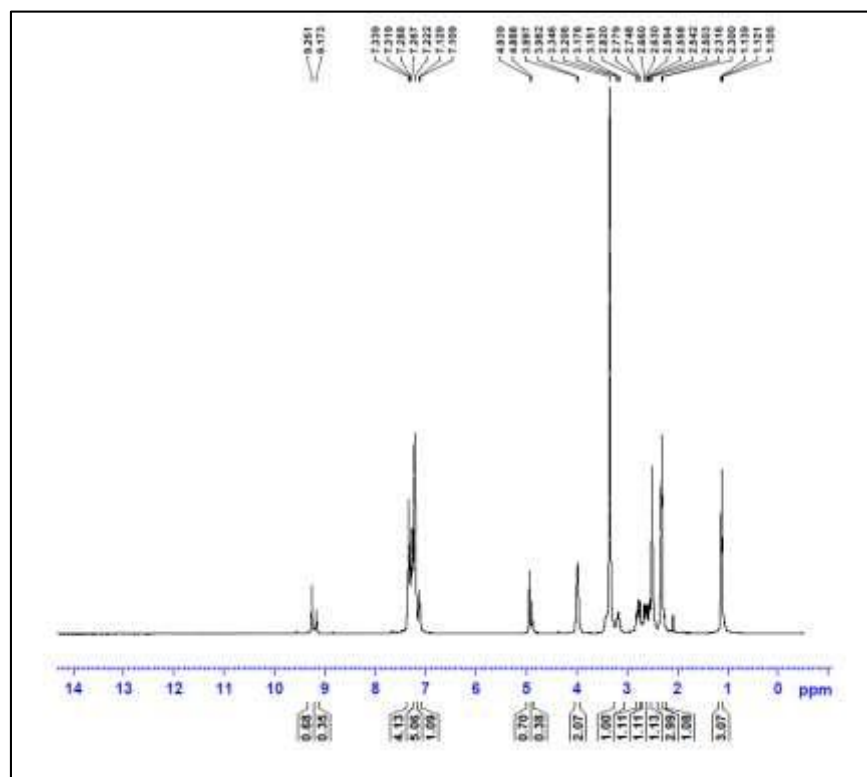

**Fig. 31.** <sup>1</sup>H NMR of (12c).

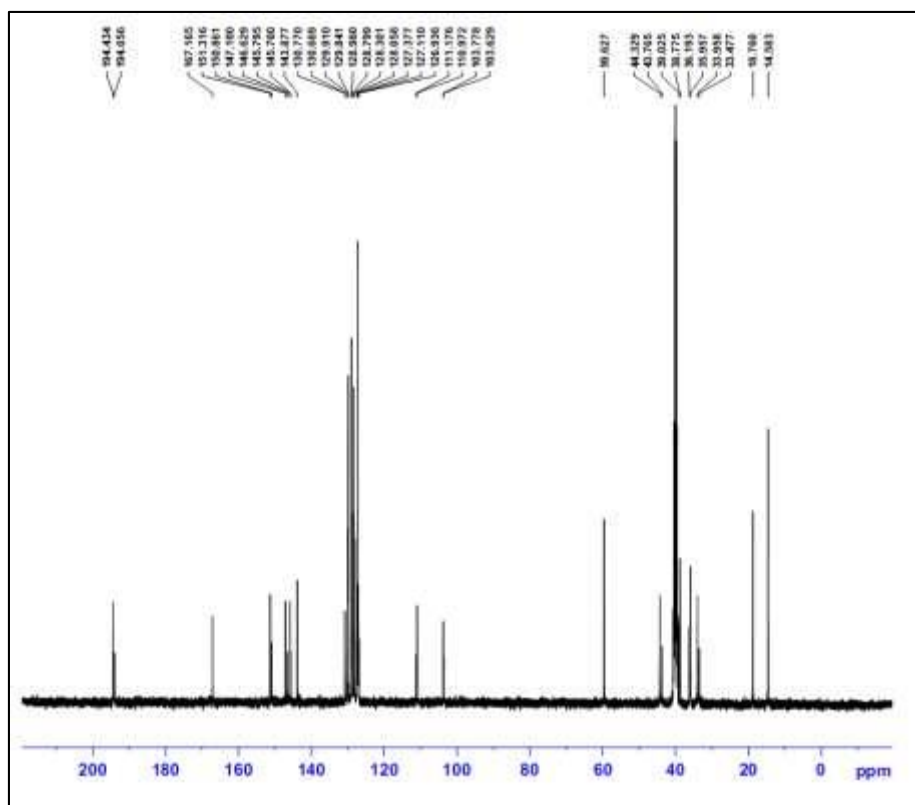

Fig. 32.  $^{13}\text{C}$  NMR of (12c).

**9-phenyl-3,4,5,6,7,9-hexahydro-1H-xanthene-1,8(2H)-dione (13a)**

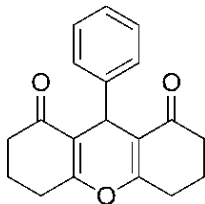

M. P.: 213-215 °C; IR (KBr,  $\text{cm}^{-1}$ )  $\nu_{\text{max}}$ : 3001, 1661, 1532, 1367, 1332, 1221, 1160, 1134, 1091, 841, 739.  $^1\text{H}$  NMR (400 MHz, DMSO):  $\delta$  1.90-2.09 (m, 4H), 2.26-2.28 (m, 2H), 2.30-2.38 (m, 2H), 2.51-2.64 (m, 4H), 4.79 (s, 1H), 7.05-7.09 (t,  $J=7.6$ , 2H), 7.11-7.12 (d,  $J=8.4$  Hz, 1H), 7.23-7.31 (dd,  $J=8, 24.2$ , 2H).  $^{13}\text{C}$  NMR (100 MHz,  $\text{DMSO}-d_6$ ):  $\delta$  20.42, 21.22, 27.19, 31.32, 37.08, 113.62, 117.13, 128.28, 128.93, 129.36, 135.97, 136.87, 141.76, 163.67, 196.62. Anal. Calcd for  $\text{C}_{19}\text{H}_{18}\text{O}_3$ : C, 77.53; H, 6.16; O, 16.31; Found: C, 77.58; H, 6.19; O, 16.37.

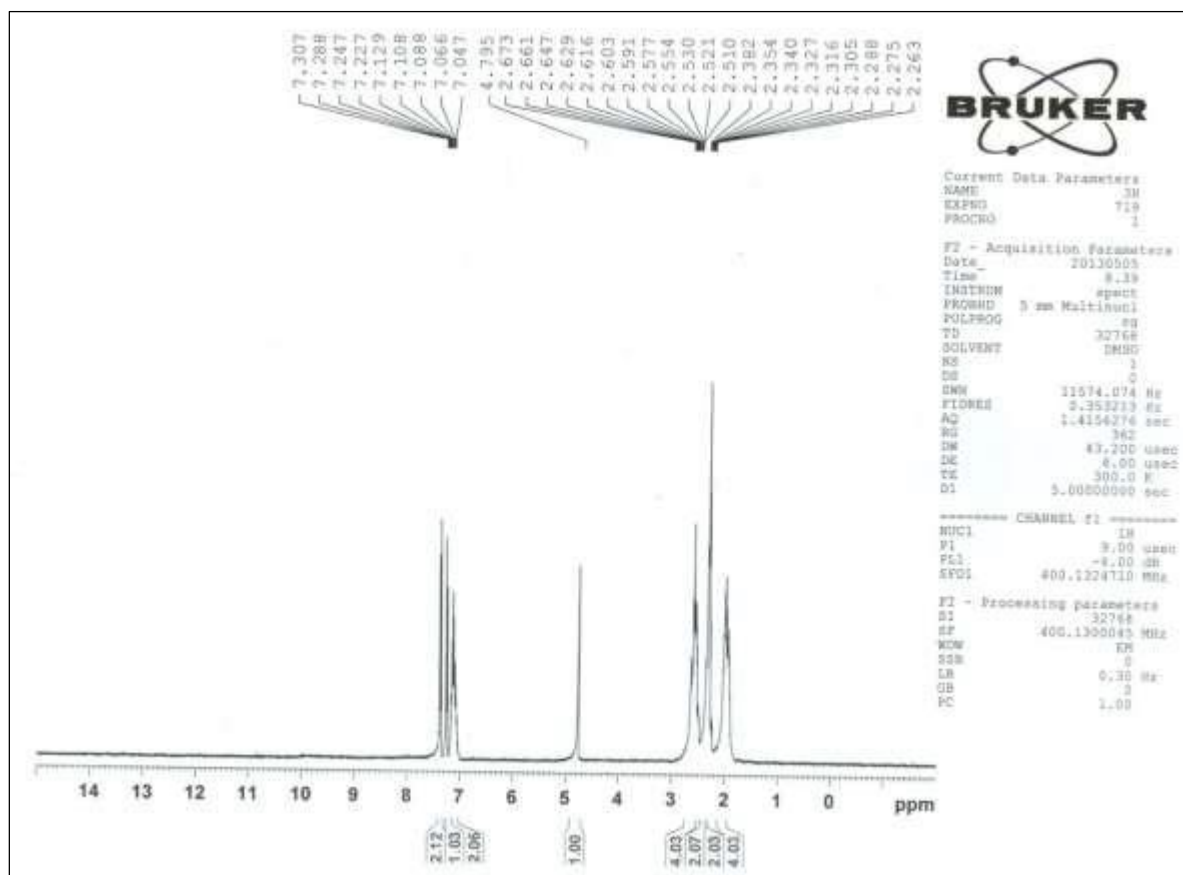

**Fig. 33.**  $^1\text{H}$  NMR of 13a.

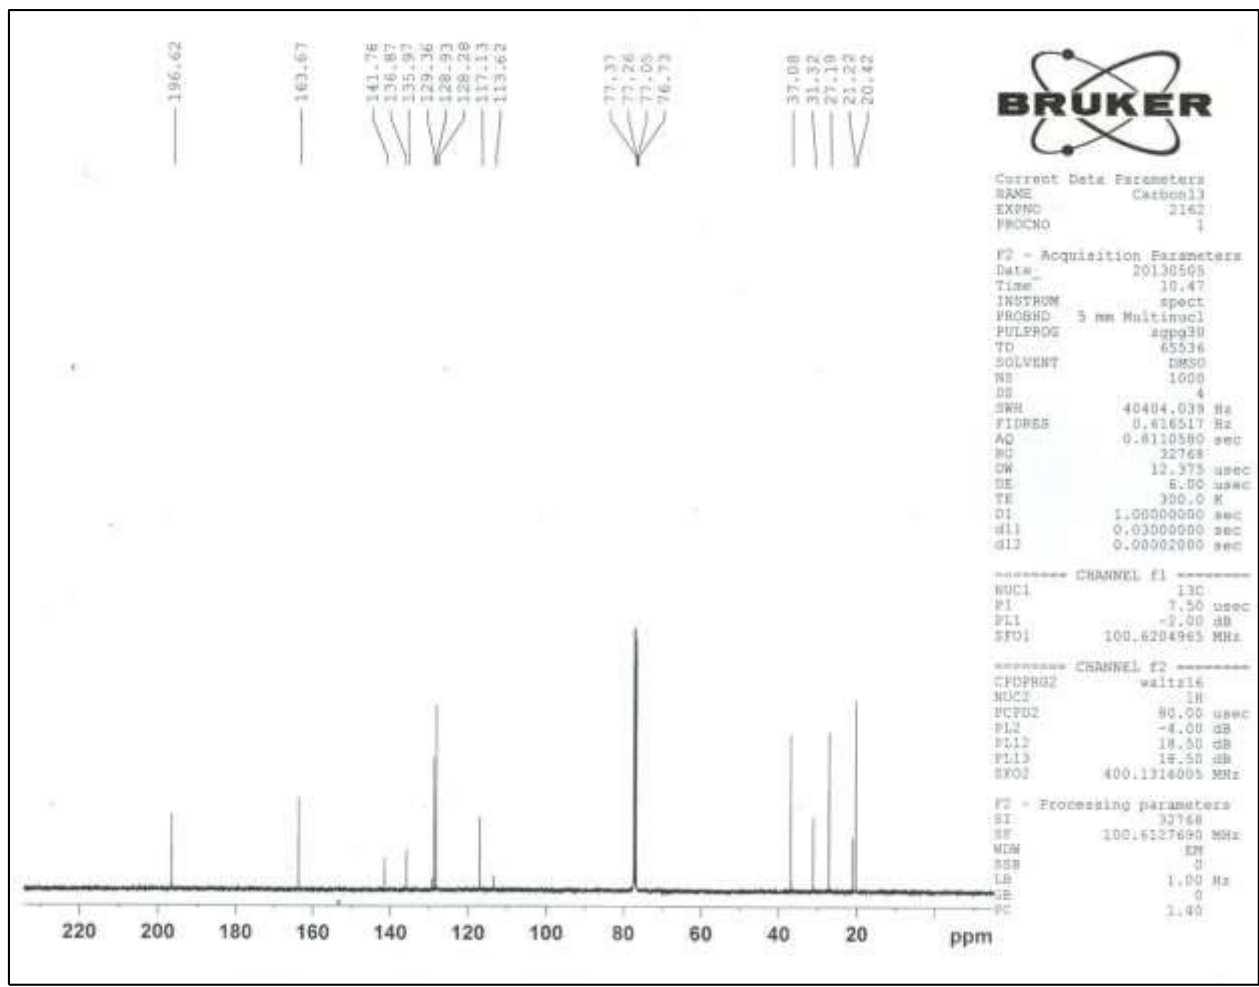

Fig. 34.  $^{13}\text{C}$  NMR of 13a.

**9-(p-tolyl)-3,4,5,6,7,9-hexahydro-1H-xanthene-1,8(2H)-dione (13b)**

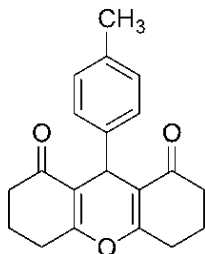

M. P.: 244-246 °C; IR (KBr,  $\text{Cm}^{-1}$ )  $\nu_{\text{max}}$ : 2973, 1667, 1531, 1362, 1328, 1224, 1158, 1132, 1081, 832, 739.  $^1\text{H}$  NMR (400 MHz, DMSO):  $\delta$  1.96-2.07 (m, 4H), 2.26 (s, 3H), 2.29-2.42 (m, 4H), 2.52-2.69 (m, 4H), 4.79 (s, 1H), 7.03-7.05 (d,  $J = 8$  Hz, 2H), 7.12-7.21 (d,  $J = 7.6$  Hz, 2H).  $^{13}\text{C}$  NMR (100 MHz, DMSO- $d^6$ ):  $\delta$  20.31, 21.06, 27.15, 31.22, 36.98, 55.14, 113.52, 117.03, 128.25, 128.84, 129.33, 135.86, 136.88, 141.53, 163.77, 196.52. Anal. Calcd for  $\text{C}_{20}\text{H}_{20}\text{O}_3$ : C, 77.90; H, 6.54; O, 15.57; Found: C, 77.97; H, 6.59; O, 15.64.

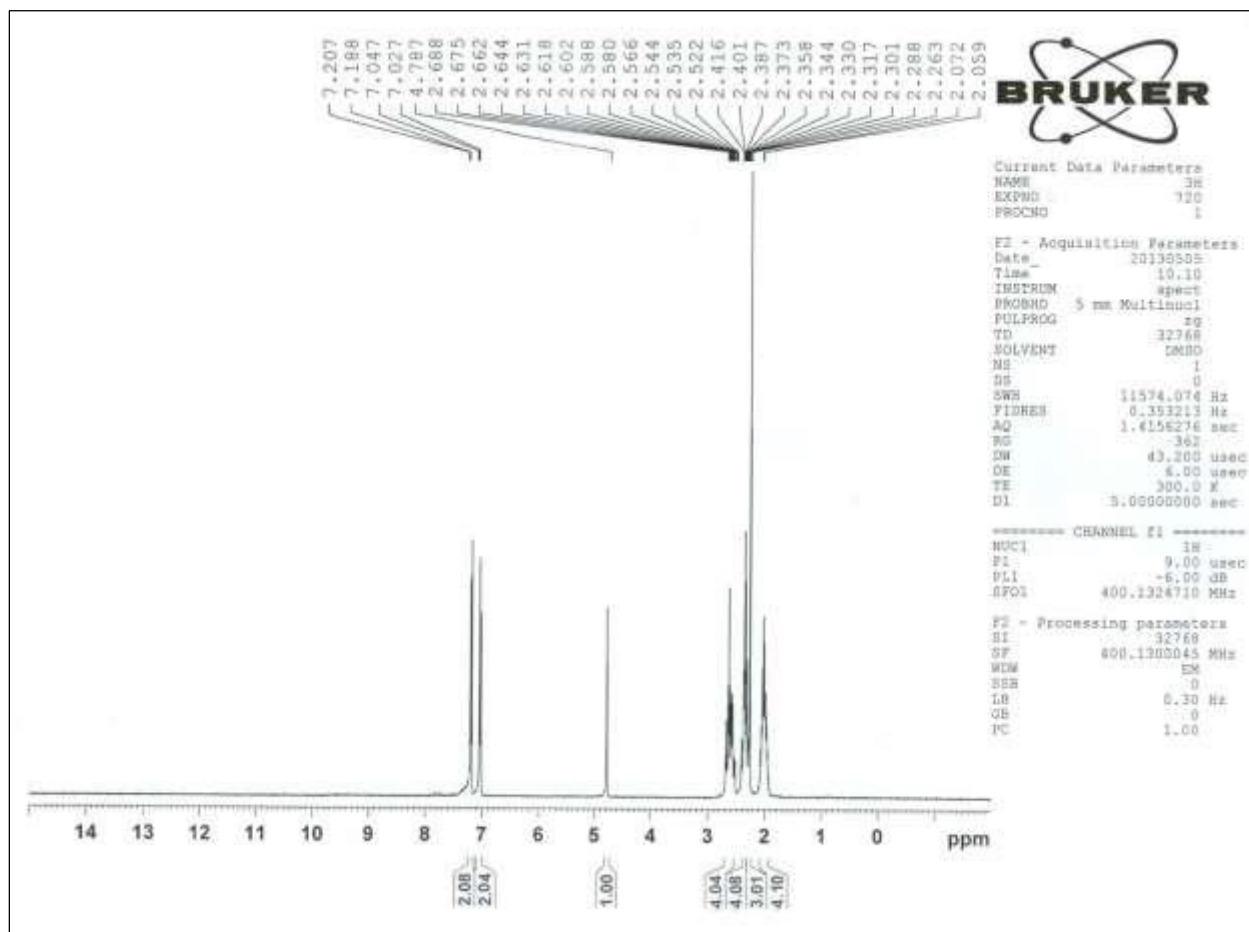

**Fig. 35.**  $^1\text{H}$  NMR of 13b.

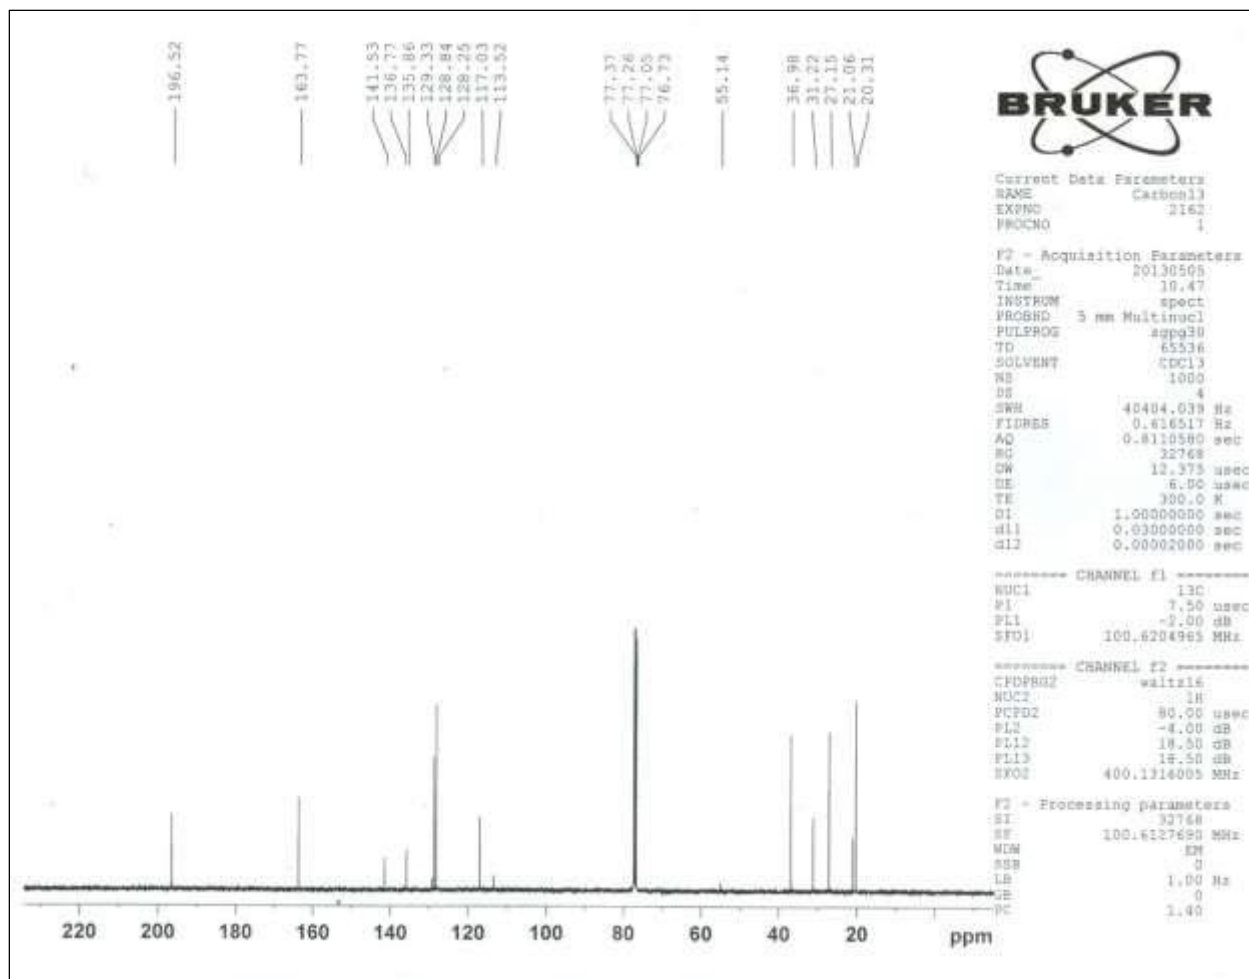

Fig. 36.  $^{13}\text{C}$  NMR of 13b.



9-(4-bromophenyl)-3,4,5,6,7,9-hexahydro-1H-xanthene-1,8(2H)-dione (13e)

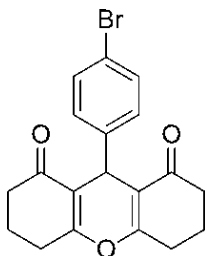

M. P.: 222-225 °C; IR (KBr,  $\text{cm}^{-1}$ )  $\nu_{\text{max}}$ : 2976, 1662, 1518, 1375, 1329, 1226, 1159, 1138, 1089, 829, 737.  $^1\text{H}$  NMR (400 MHz, DMSO):  $\delta$  1.92-2.08 (m, 4H), 2.28-2.32 (m, 2H), 2.34-2.40 (m, 2H), 2.53-2.65 (m, 4H), 4.76 (s, 1H), 7.13-7.27 (m, 2H), 7.33-7.43 (dd,  $J = 30.6, 8.4$  Hz, 2H).  $^{13}\text{C}$  NMR (100 MHz, DMSO- $d_6$ ):  $\delta$  20.10, 20.27, 27.13, 31.39, 36.76, 36.90, 116.41, 120.28, 129.43, 130.21, 131.17, 131.66, 131.83, 133.08, 143.47, 158.49, 164.12, 196.51. Anal. Calcd for  $\text{C}_{19}\text{H}_{17}\text{BrO}_3$ : C, 61.14; H, 4.59; O, 12.86; Found: C, 61.19; H, 4.65; O, 12.93.

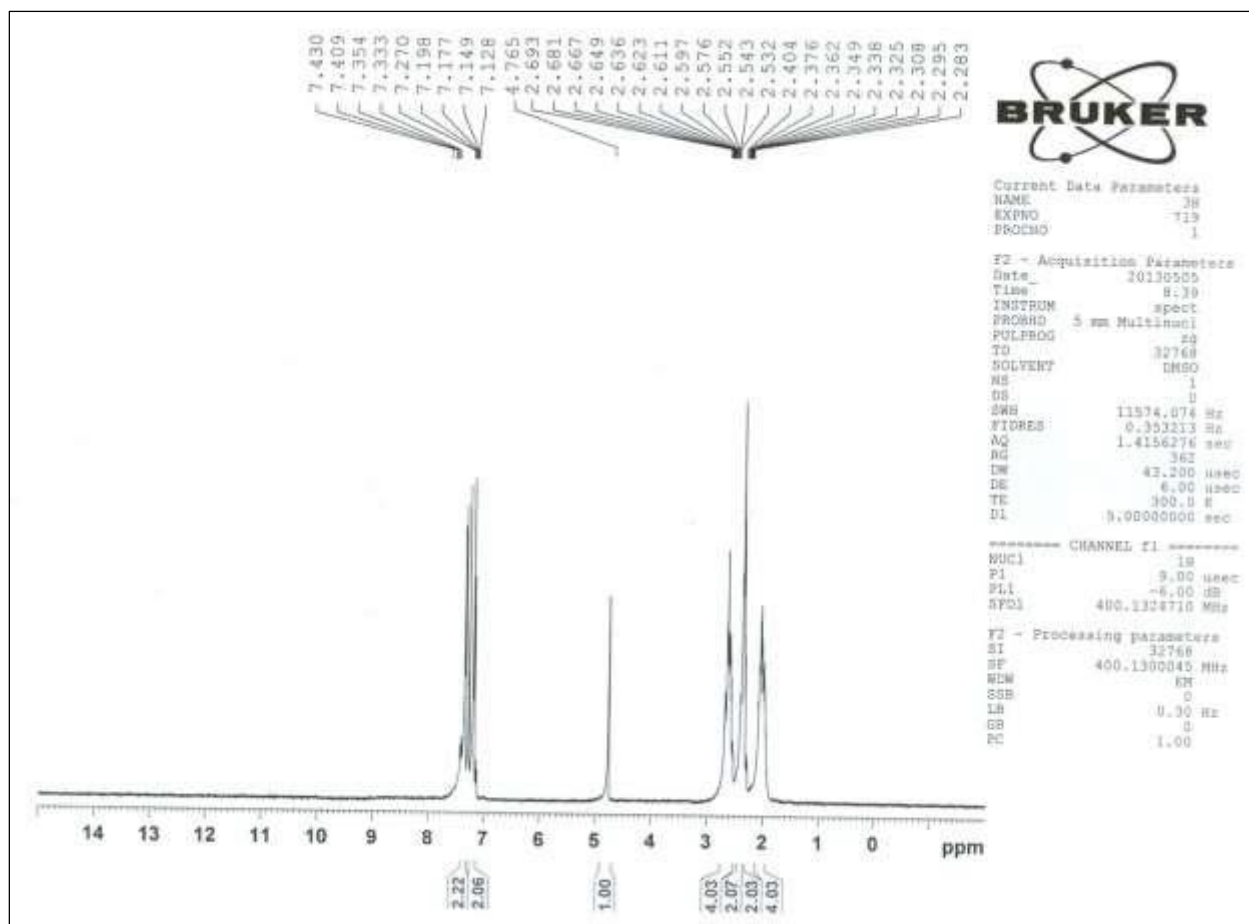

Fig. 37.  $^1\text{H}$  NMR of 13e.

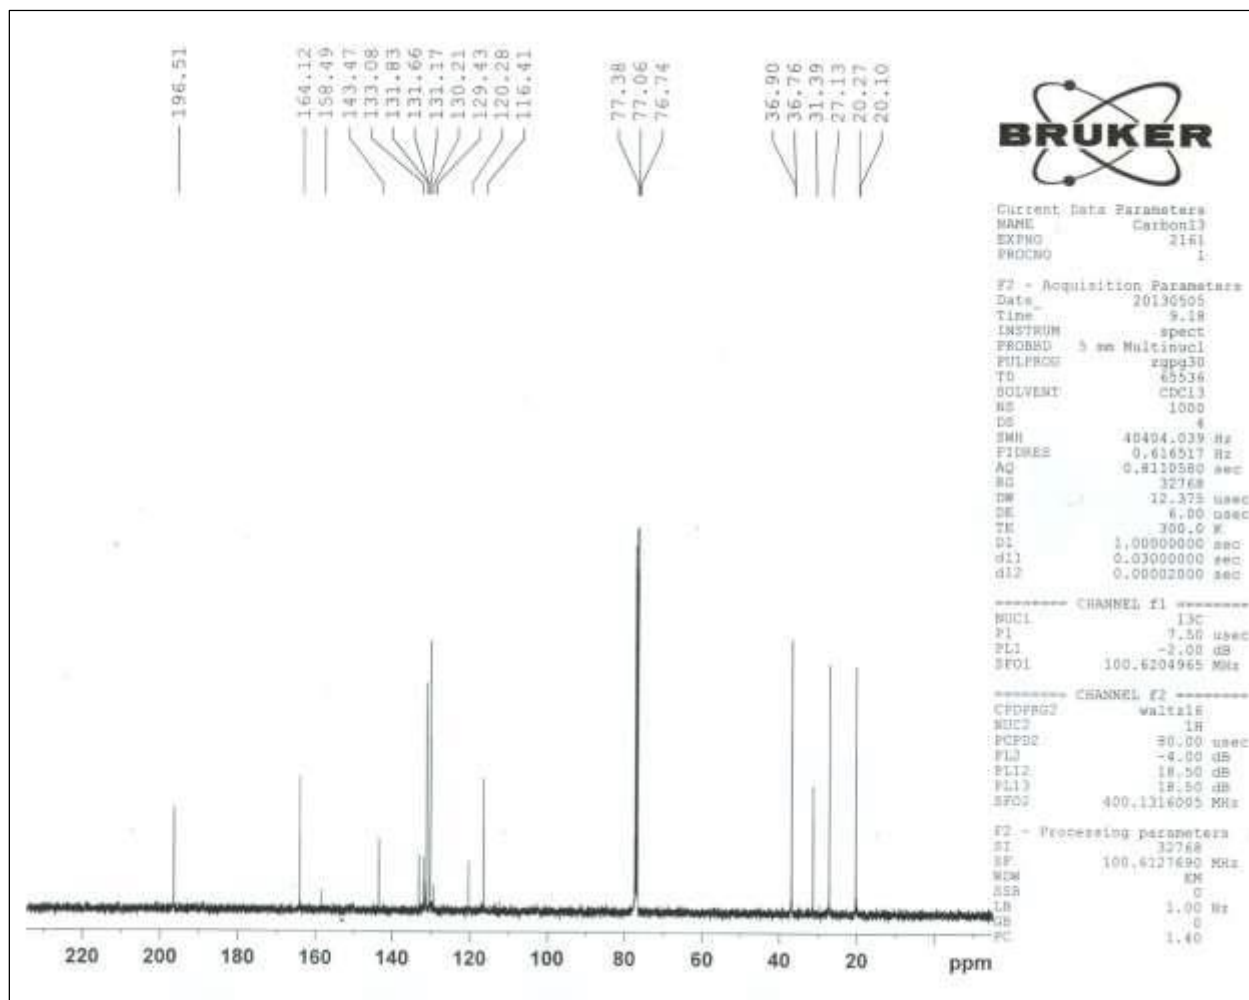

Fig. 38.  $^{13}\text{C}$  NMR of 13e.

**3,4,6,7-tetrahydro-3,3,6,6-tetramethyl-9-phenyl-2H-xanthene-1,8(5H,9H)-dione (14a)**

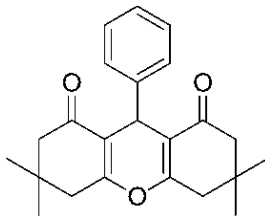

M. P.: 203-204 °C; FT-IR (KBr,  $\text{Cm}^{-1}$ )  $\nu_{\text{max}}$ : 2950, 1660, 1648, 1360, 1200, 1162, 1141, 998, 694.  $^1\text{H}$  NMR (500 MHz,  $\text{DMSO}-d_6$ ):  $\delta$ : 0.90 (s, 6H), 1.04 (s, 6H), 2.07-2.10 (d,  $J=6.4$  Hz, 2H), 2.25-2.28 (d,  $J=6.5$  Hz, 2H), 2.51-2.60 (m, 3H), 4.53 (s, 1H), 7.09-7.12 (t,  $J=2.8$  Hz, 1H), 7.17-7.18 (d,  $J=2.8$  Hz, 1H), 7.20-7.23 (t,  $J=2.9$  Hz, 3H).  $^{13}\text{C}$  NMR ( $\text{DMSO}$ , 125 MHz),  $\delta$ : 26.45, 29.13, 32.14, 32.88, 50.24, 111.47, 125.46, 127.56, 127.63, 147.15, 149.32, 194.36. Anal. Calcd for  $\text{C}_{23}\text{H}_{26}\text{O}_3$ : C, 78.83; H, 7.48; O, 13.70; Found: C, 78.92; H, 7.59; O, 13.83.

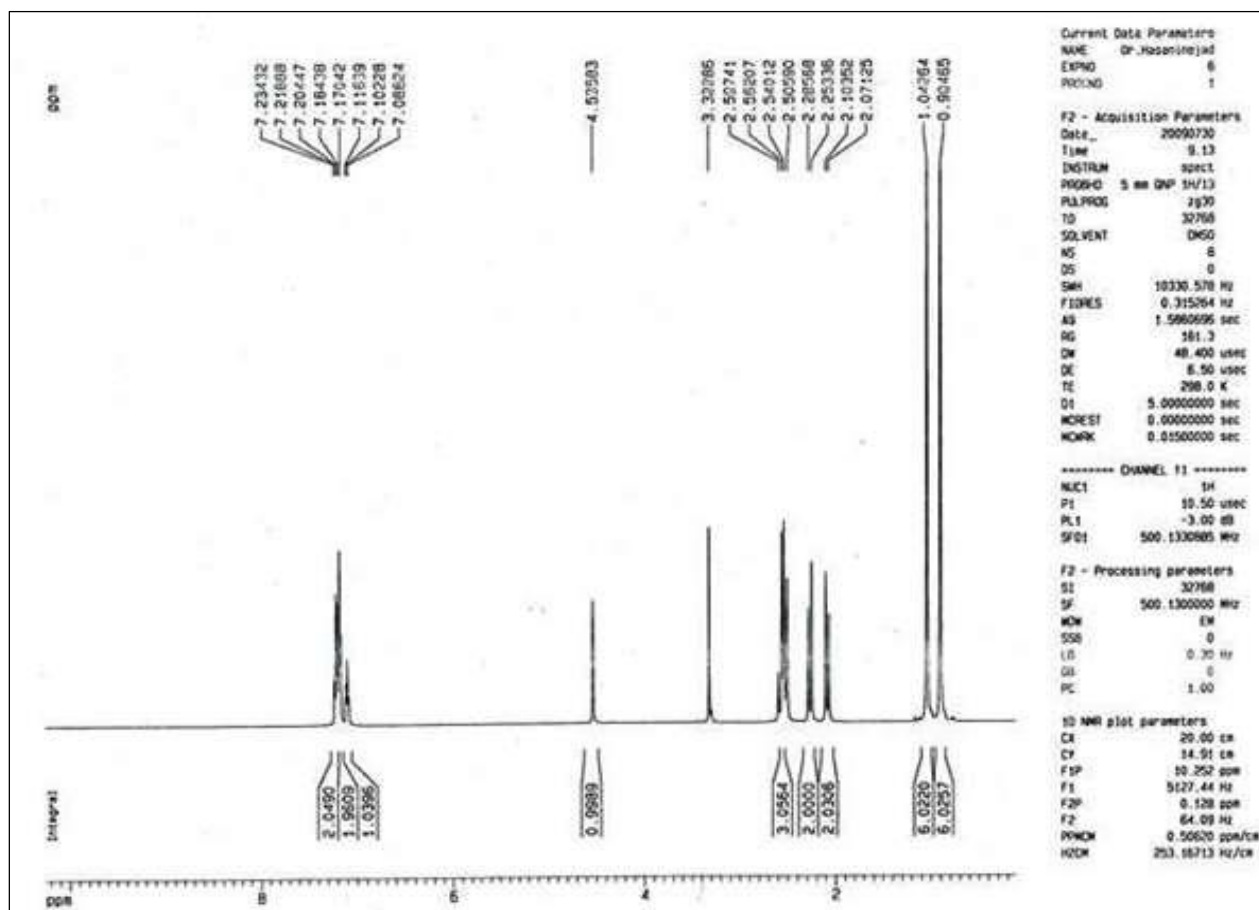

**Fig. 39.**  $^1\text{H}$  NMR of 14a.

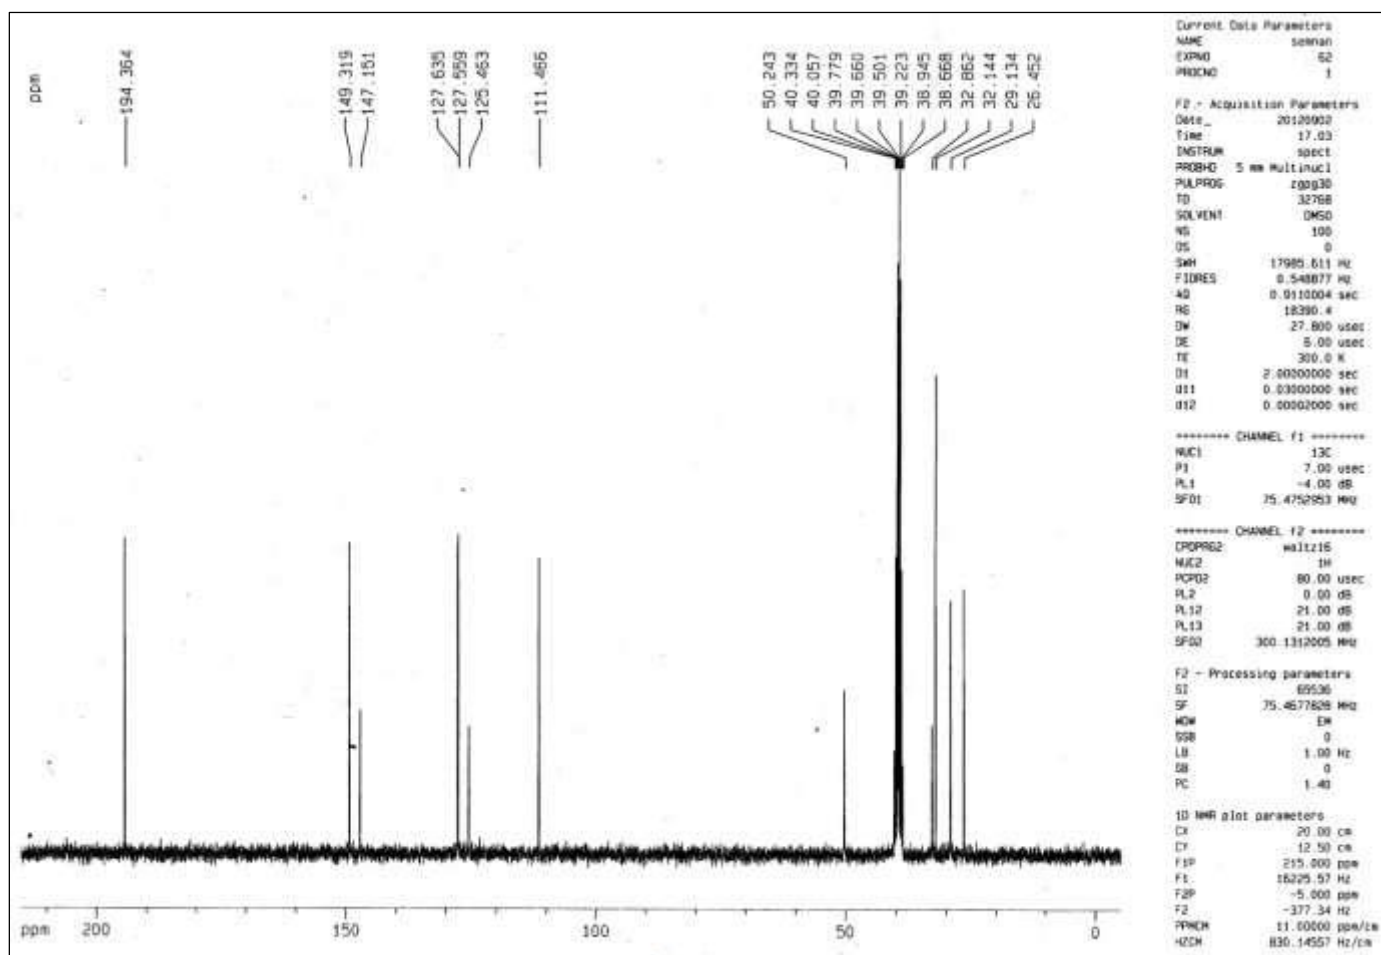

Fig. 40.  $^{13}\text{C}$  NMR of 14a.

3,4,6,7-tetrahydro-3,3,6,6-tetramethyl-9-o-tolyl-2H-xanthene-1,8(5H,9H)-dione (14b)

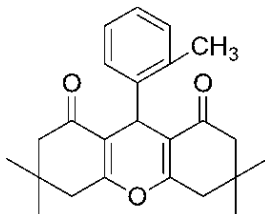

M. P.: 230-232 °C; FT-IR (KBr,  $\text{Cm}^{-1}$ )  $\nu_{\text{max}}$ : 2910, 1660, 1620, 1350, 1200, 1160, 1020, 853.  $^1\text{H}$  NMR (500 MHz,  $\text{CDCl}_3$ ):  $\delta$ : 0.88 (s, 6H), 1.04 (s, 6H), 2.03-2.06 (d,  $J=6.5$  Hz, 2H), 2.24-2.27 (d,  $J=6.5$  Hz, 2H), 2.48-2.51 (d,  $J=6.5$  Hz, 2H), 2.57-2.60 (d,  $J=7$  Hz, 2H) 2.71 (s, 3H), 4.63 (s, 1H), 7.09-7.11 (t,  $J=5.6$  Hz, 1H), 7.17-7.18 (d,  $J=2.8$  Hz, 1H) 7.20-7.23 (t,  $J=6.0$  Hz, 2H). Anal. Calcd for  $\text{C}_{24}\text{H}_{28}\text{O}_3$ : C, 79.09; H, 7.74; O, 13.17; Found: C, 79.18; H, 7.89; O, 13.31.

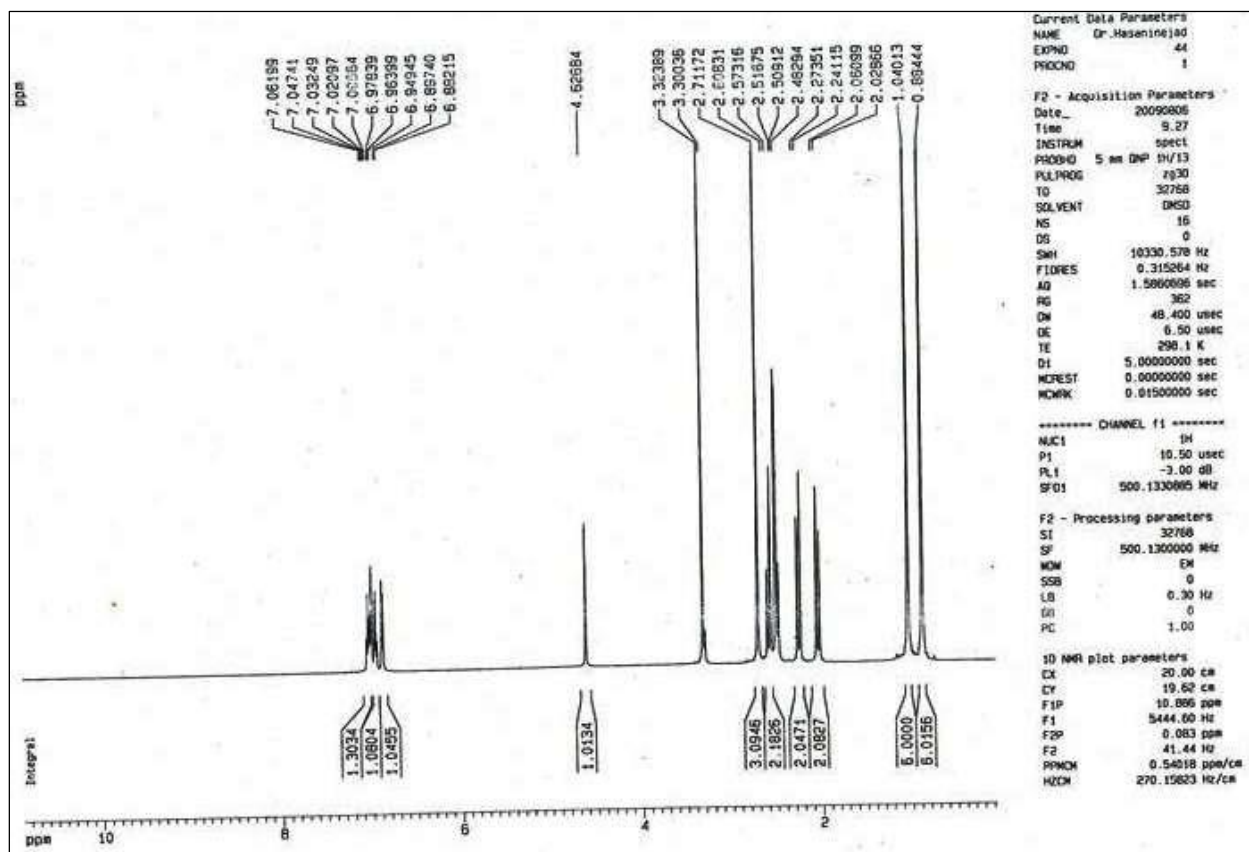

Fig. 41.  $^1\text{H}$  NMR of 14b.

**9-(4-fluorophenyl)-3,3,6,6-tetramethyl-3,4,5,6,7,9-hexahydro-1H-xanthene-1,8(2H)-dione**  
(14f)

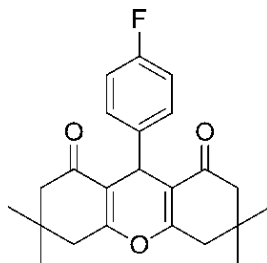

M. P.: 206-207 °C; FT-IR (KBr,  $\text{Cm}^{-1}$ )  $\nu_{\text{max}}$ : 2980, 1672, 1512, 1373, 1333, 1218, 1166, 1135, 1086, 835, 733.  $^1\text{H}$  NMR (400 MHz,  $\text{CDCl}_3$ )  $\delta$ : 0.99 (s, 6H), 1.11 (s, 6H), 2.15-2.26 (dd,  $J=16$ , 28.6 Hz, 4H), 2.46 (s, 4H), 4.73 (s, 1H), 6.88-6.92 (t,  $J=8.8$  Hz, 2H), 7.24-7.27 (d,  $J=10.8$  Hz, 2H).  $^{13}\text{C}$  NMR (125 MHz,  $\text{CDCl}_3$ )  $\delta$ : 27.22, 29.53, 32.00, 32.74, 50.05, 56.62, 60.79, 106.34, 115.16, 136.89, 140.71, 153.26, 163.56, 197.05. Anal. Calcd for  $\text{C}_{23}\text{H}_{25}\text{FO}_3$ : C, 74.98; H, 6.84; O, 13.03; Found: C, 74.93; H, 6.82; O, 13.09.

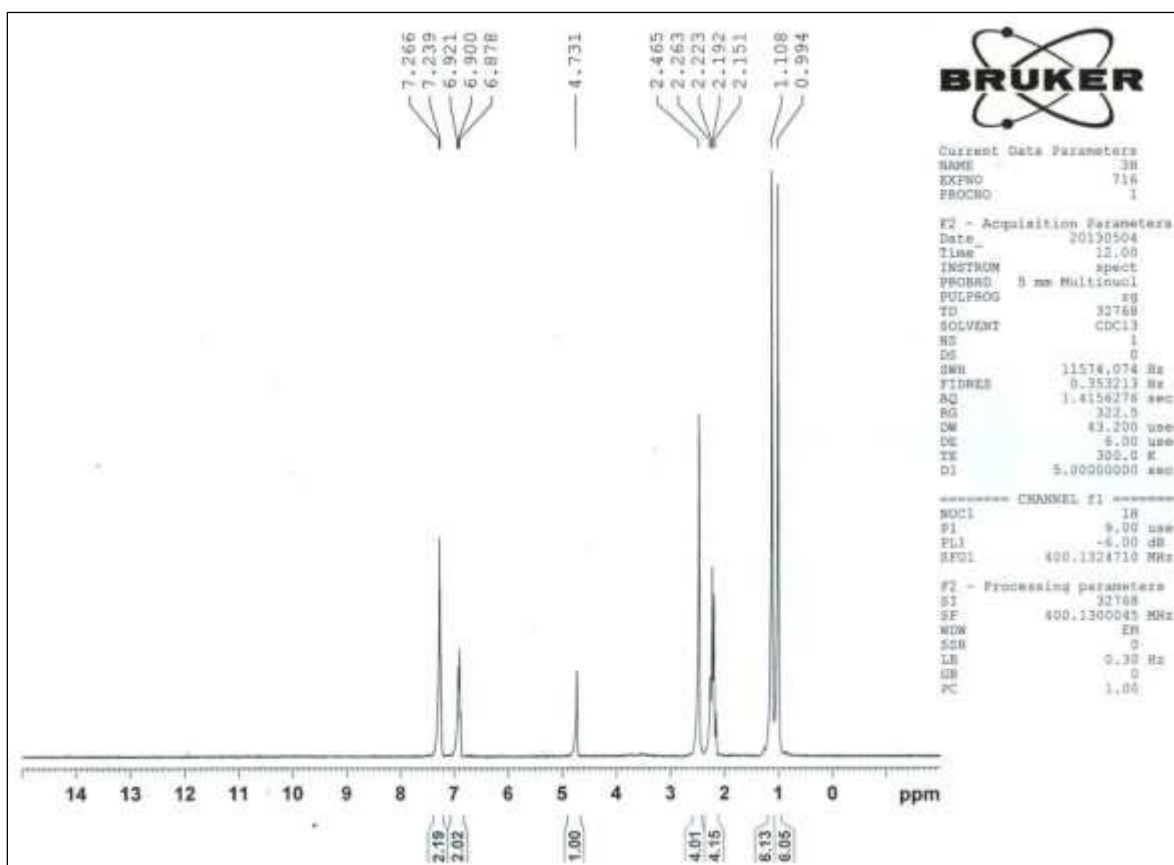

**Fig. 42.**  $^1\text{H}$  NMR of 14f.

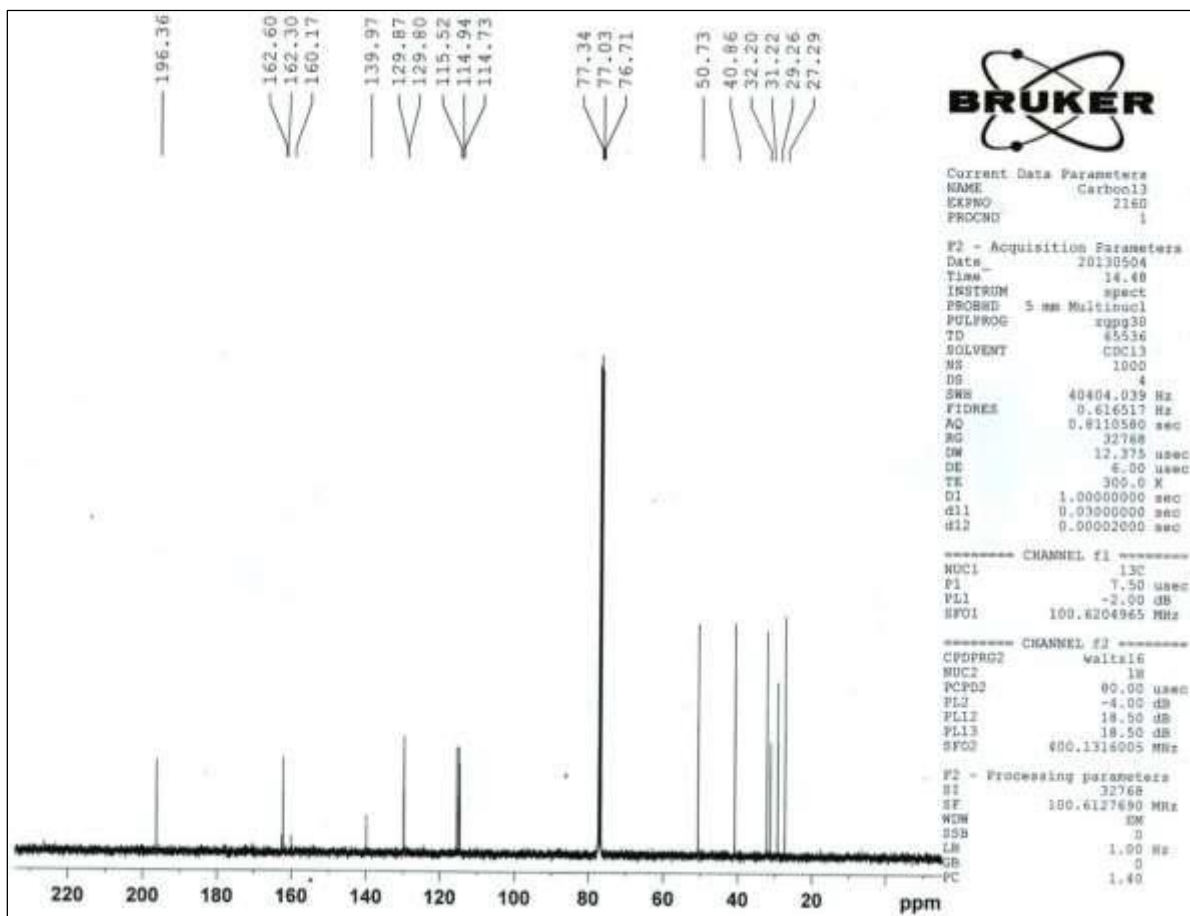

Fig. 43.  $^{13}\text{C}$  NMR of 4f.

**3,4,6,7-tetrahydro-3,3,6,6-tetramethyl-9-(3-nitrophenyl)-2H-xanthene-1,8(5H,9H)-dione**  
(14j)

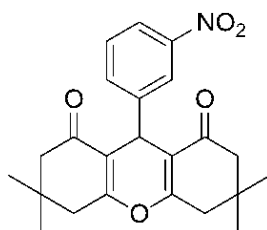

M. P.: 168-169 °C; FT-IR (KBr,  $\text{Cm}^{-1}$ )  $\nu_{\text{max}}$ : 2950, 1659, 1619, 1520, 1360, 1200, 1180, 1000.  $^1\text{H}$  NMR (500 MHz,  $\text{CDCl}_3$ ):  $\delta$ : 0.91 (s, 6H), 1.05 (s, 6H), 2.09-2.12 (d,  $J=4.4$  Hz, 2H), 2.27-2.30 (d,  $J=6.4$  Hz, 2H), 2.55-2.63 (dd,  $J=7.2$  Hz, 4H), 4.64 (s, 1H), 7.55-7.58 (t,  $J=3.1$  Hz, 1H), 7.65-7.67 (d,  $J=3$  Hz, 1H), 7.99-8.02 (d,  $J=5.1$  Hz, 2H).  $^{13}\text{C}$  NMR (125 MHz,  $\text{CDCl}_3$ )  $\delta$ : 27.24, 29.56, 32.03, 32.72, 50.02, 56.65, 60.77, 106.31, 115.13, 136.85, 140.75, 153.22, 163.89, 197.01. Anal. Calcd. for  $\text{C}_{23}\text{H}_{25}\text{NO}_5$ : C, 69.86; H, 6.37; N, 3.54; O, 20.23; Found: C, 69.91; H, 6.49; N, 3.68; O, 20.35.

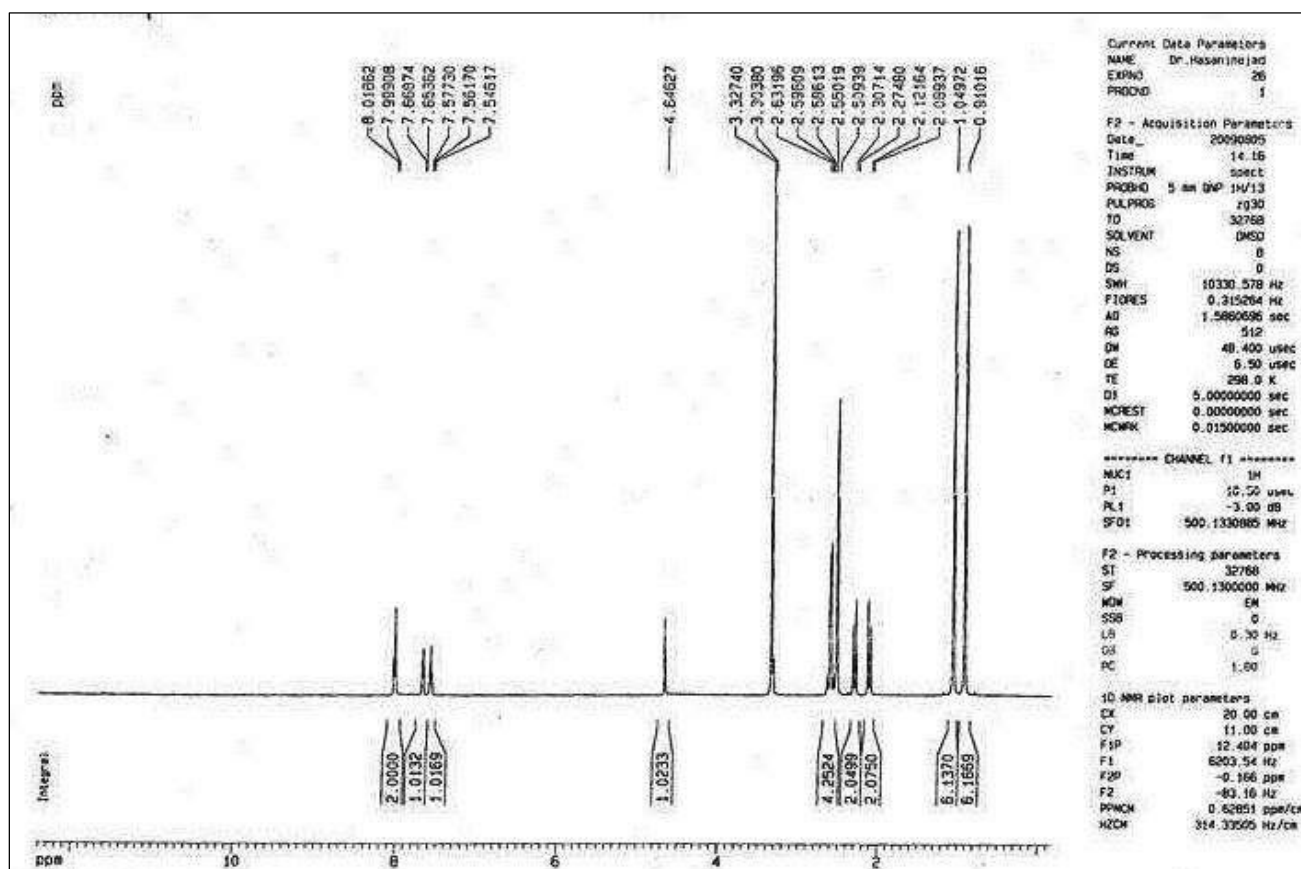

Fig. 44.  $^1\text{H}$  NMR of 14j.



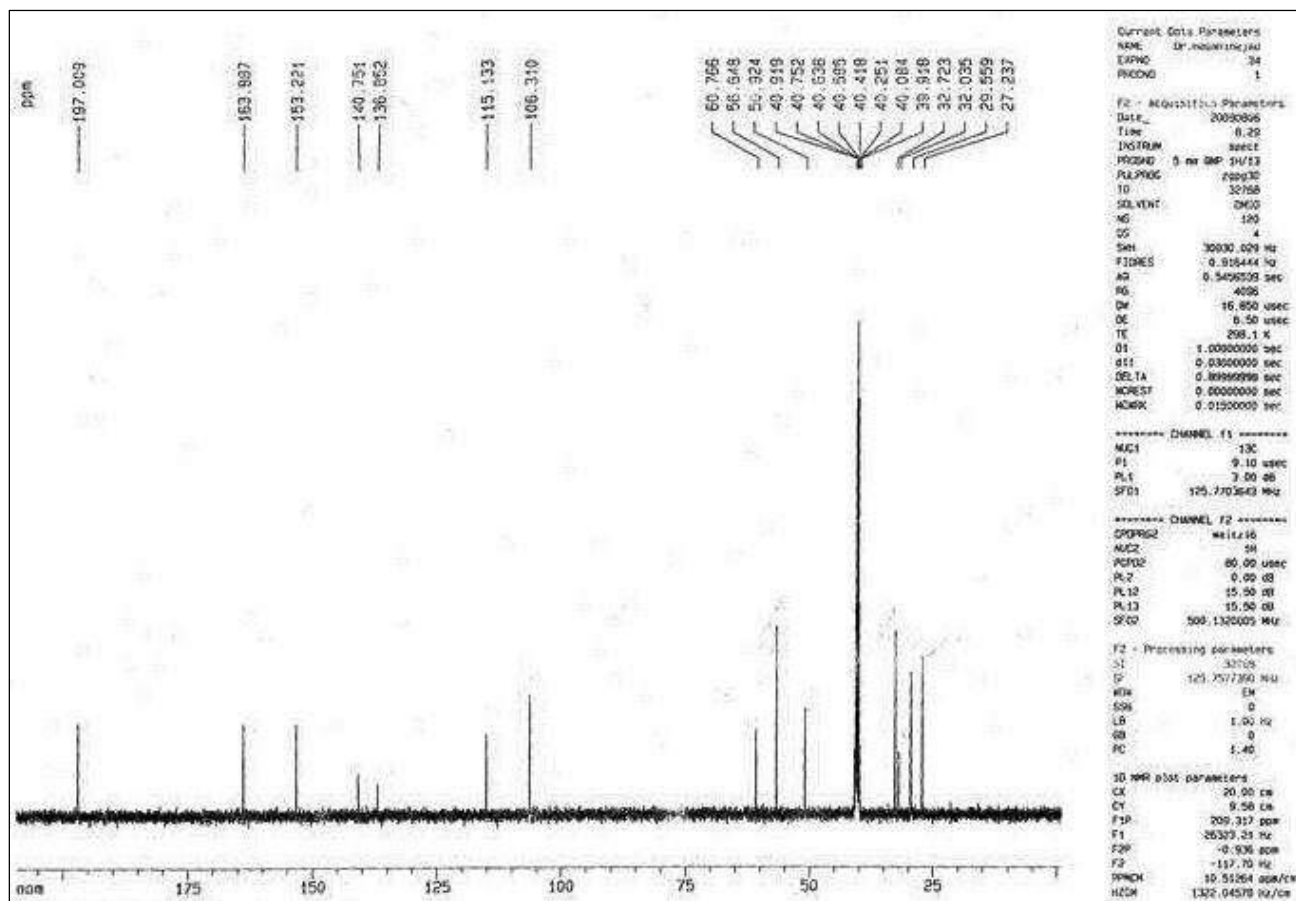

Fig. 45.  $^{13}\text{C}$  NMR of 14j.

**3,4,6,7-tetrahydro-3,3,6,6-tetramethyl-9-(4-nitrophenyl)-2H-xanthene-1,8(5H,9H)-dione**  
(14k)

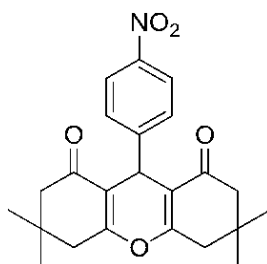

M. P.: 222-224 °C; FT-IR (KBr,  $\text{Cm}^{-1}$ )  $\nu_{\text{max}}$ : 2950, 1658, 1614, 1508, 1360, 1340, 1196, 1160, 1136.  $^1\text{H}$  NMR (500 MHz,  $\text{CDCl}_3$ )  $\delta$ : 0.90 (s, 6H), 1.05 (s, 6H), 2.08-2.11 (d,  $J=6.5$  Hz, 2H), 2.27-2.30 (d,  $J=6.5$  Hz, 2H), 2.50-2.63 (m, 4H), 4.63 (s, 1H), 7.45-7.48 (m, 2H), 8.10-8.12 (m, 2H).  $^{13}\text{C}$  NMR (125 MHz,  $\text{CDCl}_3$ )  $\delta$ : 27.24, 29.57, 32.13, 32.74, 50.96, 56.69, 60.80, 106.33, 115.15, 136.86, 140.77, 153.26, 163.89, 197.11. Anal. Calcd for  $\text{C}_{23}\text{H}_{25}\text{NO}_5$ : C, 69.86; H, 6.37; N, 3.54; O, 20.23; Found: C, 69.91; H, 6.49; N, 3.68; O, 20.35.

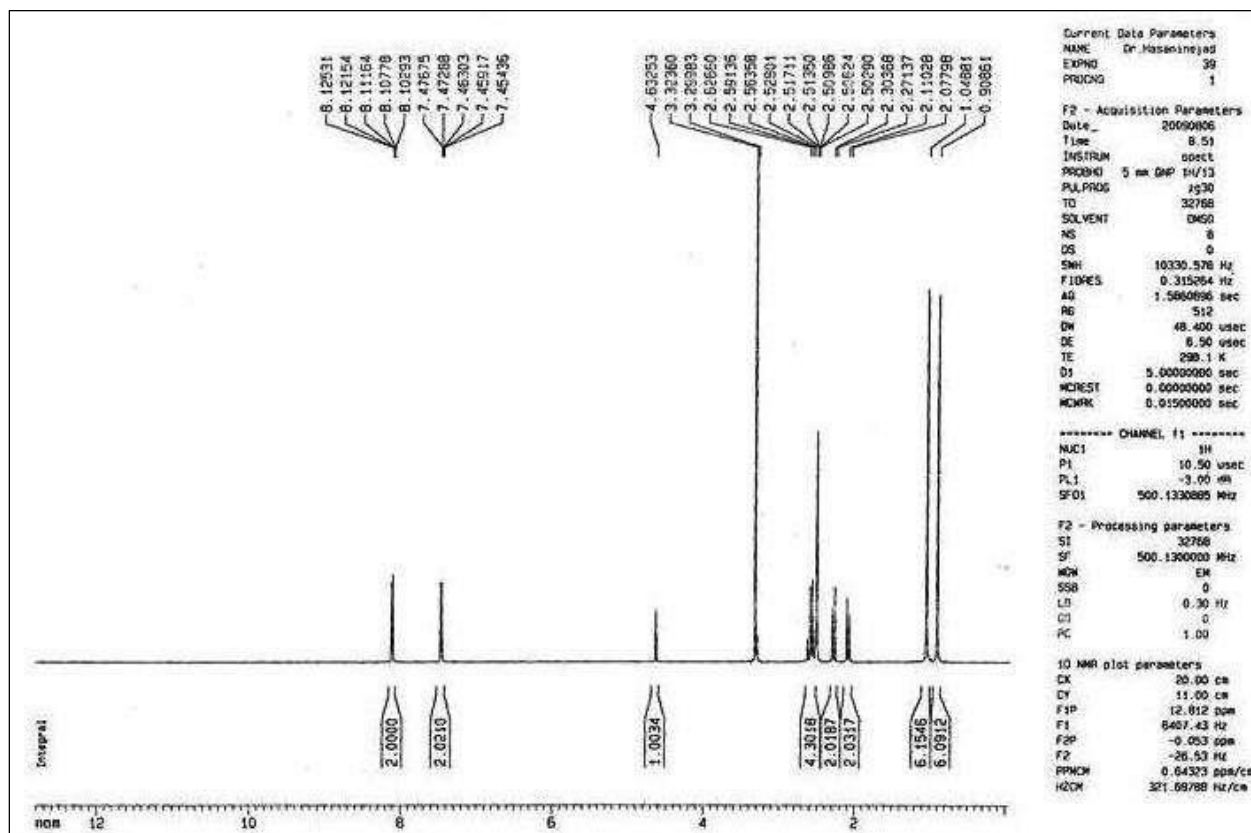

Fig. 46.  $^1\text{H}$  NMR of 14k.

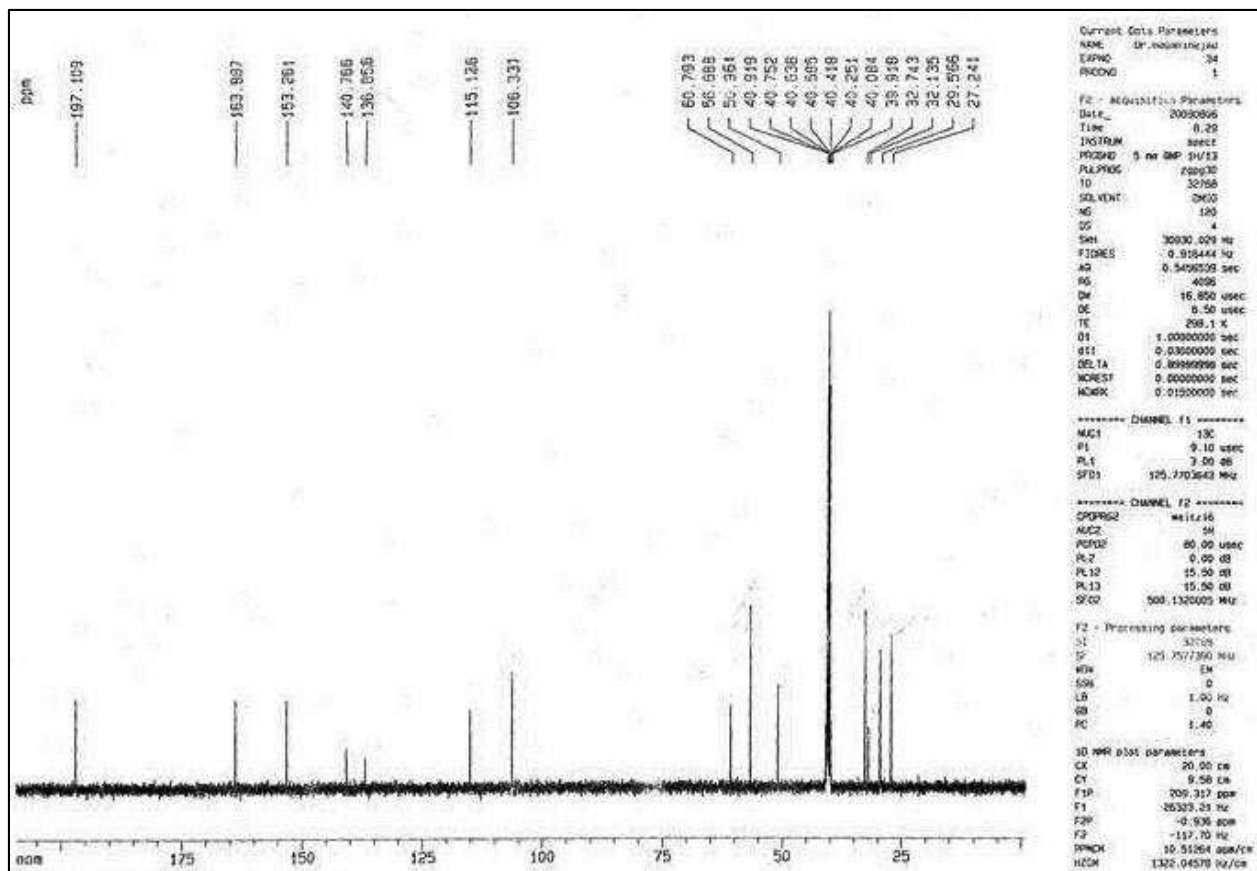

Fig. 47.  $^{13}\text{C}$  NMR of 14k.

(E)-3,3,6,6-tetramethyl-9-styryl-3,4,5,6,7,9-hexahydro-1H-xanthene-1,8(2H)-dione (14l)

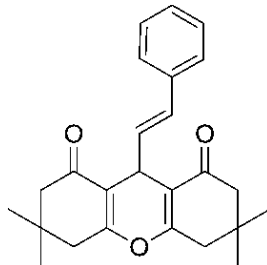

M. P.: 256-258 °C; FT-IR (KBr,  $\text{cm}^{-1}$ )  $\nu_{\text{max}}$ : 3412, 3000, 1630, 1610, 1380, 1200, 1160, 1140, 1000, 958.  $^1\text{H}$  NMR (500 MHz,  $\text{CDCl}_3$ )  $\delta$ : 1.04-1.06 (d, 12H), 2.23-2.26 (d,  $J$ = 16.17 Hz, 2H), 2.30-2.33 (d,  $J$ = 16.02 Hz, 2H), 2.52 (s, 4H), 4.15-4.16 (d,  $J$ = 5.29 Hz, 1H), 6.16-6.22 (m, 2H), 7.19-7.28 (m, ArH, 5H).  $^{13}\text{C}$  NMR (125 MHz,  $\text{CDCl}_3$ )  $\delta$ : 27.68, 28.33, 29.41, 32.79, 50.98, 114.08, 126.82, 129.19, 129.45, 130.41, 132.21, 137.48, 164.38, 197.15. Anal. Calcd for  $\text{C}_{25}\text{H}_{28}\text{O}_3$ : C, 79.75; H, 7.50; O, 12.75; Found: C, 79.82; H, 7.52; O, 12.78.

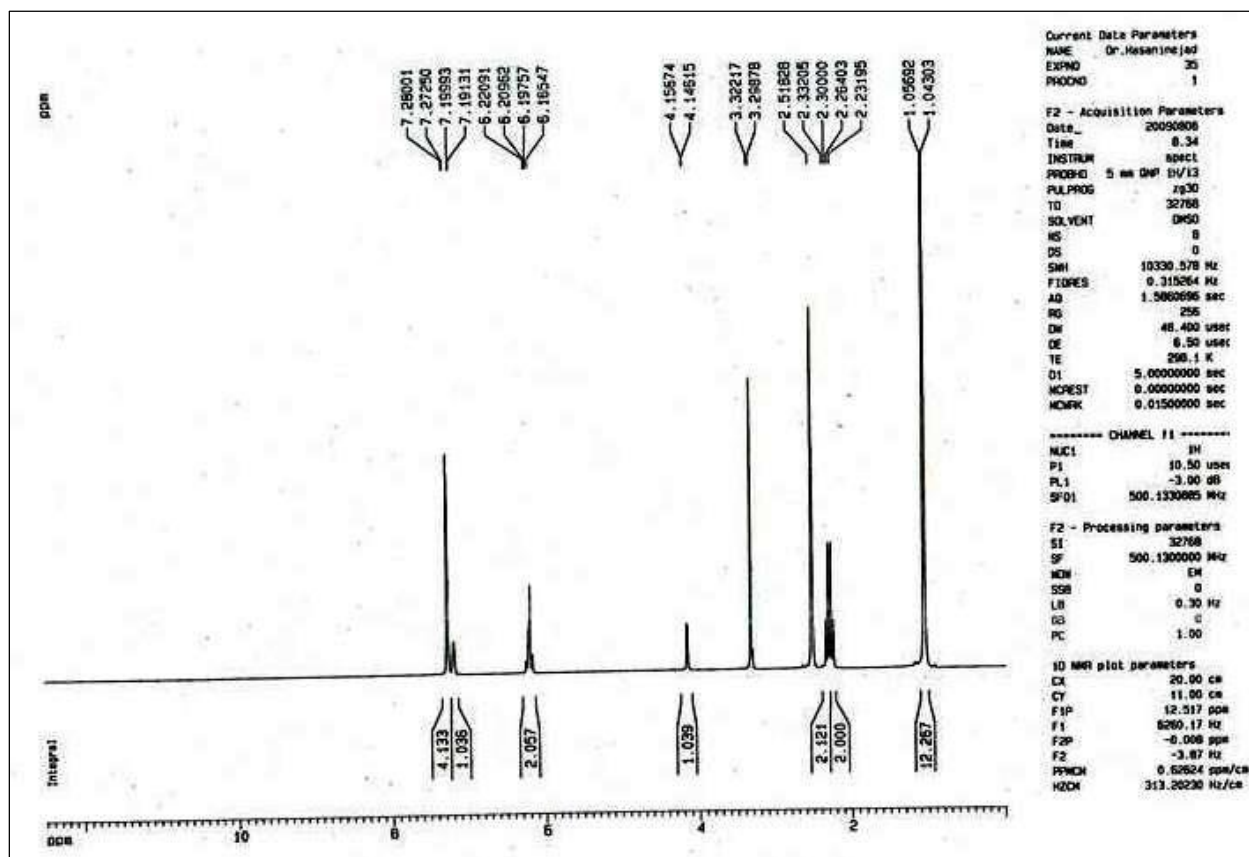

Fig. 48.  $^1\text{H}$  NMR of 14l.

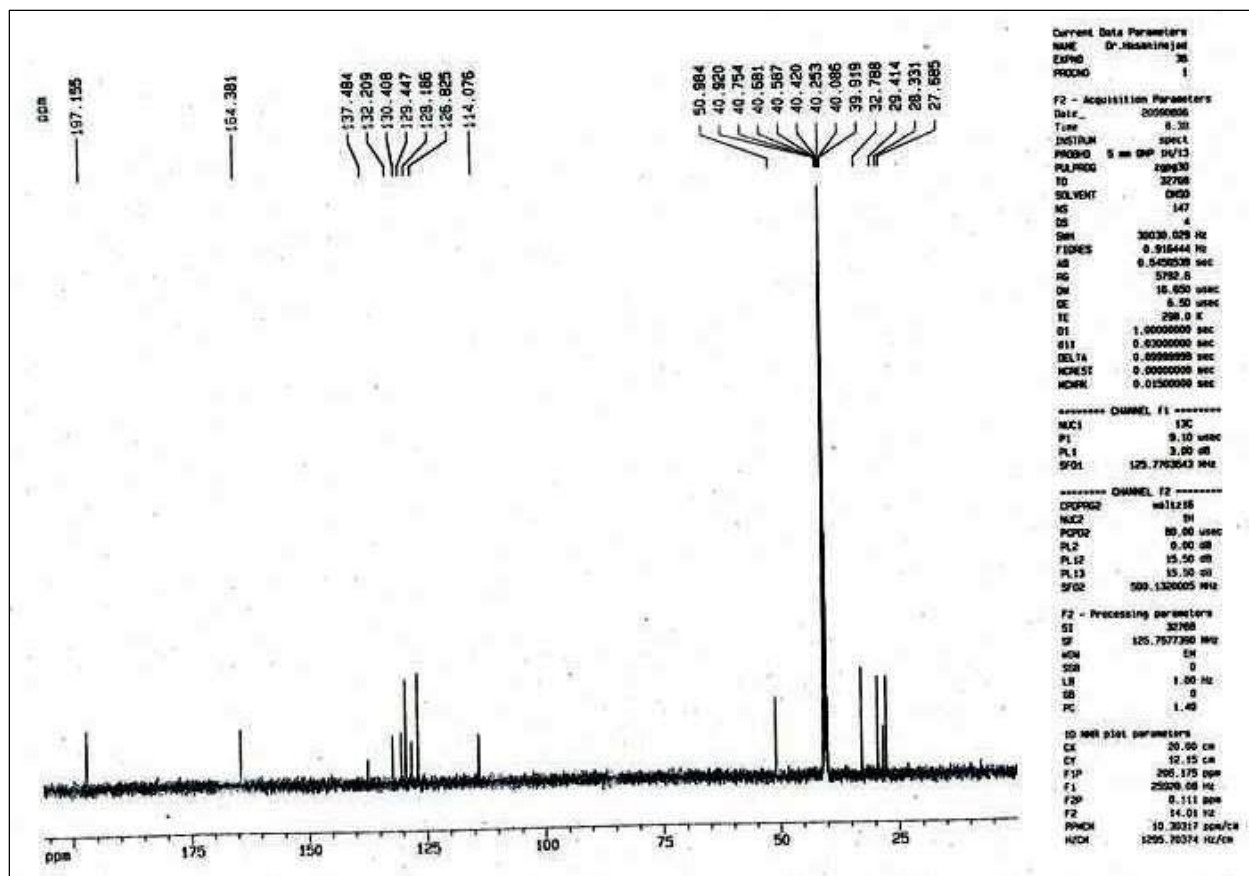

Fig. 49.  $^{13}\text{C}$  NMR of 14l.

**3,3,6,6-tetramethyl-9-(naphthalen-2-yl)-3,4,5,6,7,9-hexahydro-1H-xanthene-1,8(2H)-dione  
(14m)**

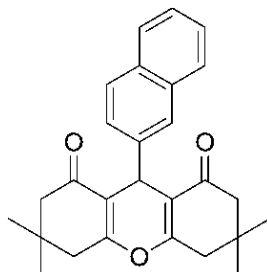

M. P.: 234-235 °C; FT-IR (KBr,  $\text{Cm}^{-1}$ )  $\nu_{\text{max}}$ : 3053, 2833, 1640, 1585, 1503, 1373, 1276, 1133, 813, 748.  $^1\text{H}$  NMR (400 MHz,  $\text{CDCl}_3$ ):  $\delta$ : 0.99 (s, 6H), 1.12 (s, 6H), 2.13-2.06 (d,  $J=6.5$  Hz, 2H), 2.24-2.27 (d,  $J=6.5$  Hz, 2H), 2.48-2.51 (d,  $J=6.5$  Hz, 2H), 2.57-2.60 (d,  $J=7$  Hz, 2H) 2.71 (s, 3H), 4.63 (s, 1H), 7.09-7.11 (t,  $J=5.6$  Hz, 1H), 7.17-7.18 (d,  $J=2.8$  Hz, 1H) 7.20-7.23 (t,  $J=6.0$  Hz, 2H).  $^{13}\text{C}$  NMR (125 MHz,  $\text{CDCl}_3$ )  $\delta$ : 21.47, 27.80, 29.69, 31.86, 32.62, 41.30, 51.20, 116.19, 128.66, 129.20, 136.17, 141.63, 162.51, 196.80. Anal. Calcd for  $\text{C}_{27}\text{H}_{28}\text{O}_3$ : C, 80.97; H, 7.05; O, 11.98; Found: C, 80.91; H, 7.09; O, 12.05.

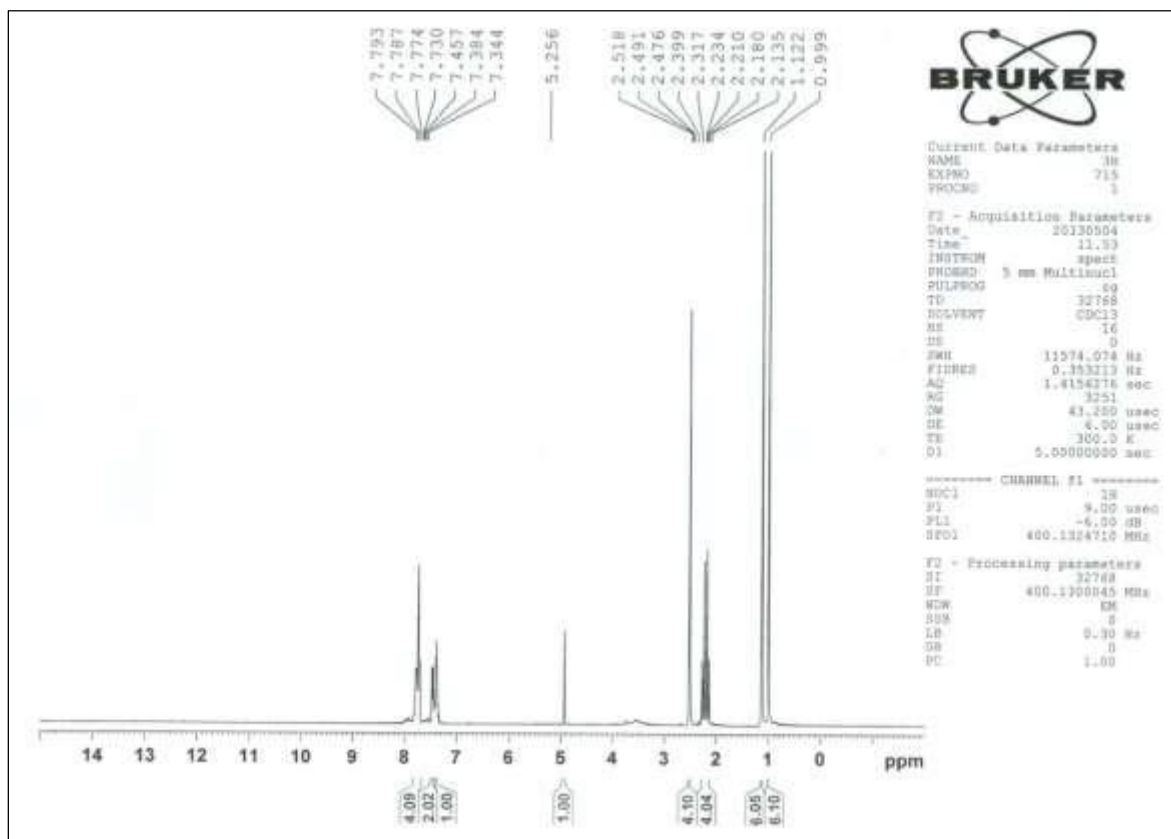

**Fig. 50.**  $^1\text{H}$  NMR of 14m.

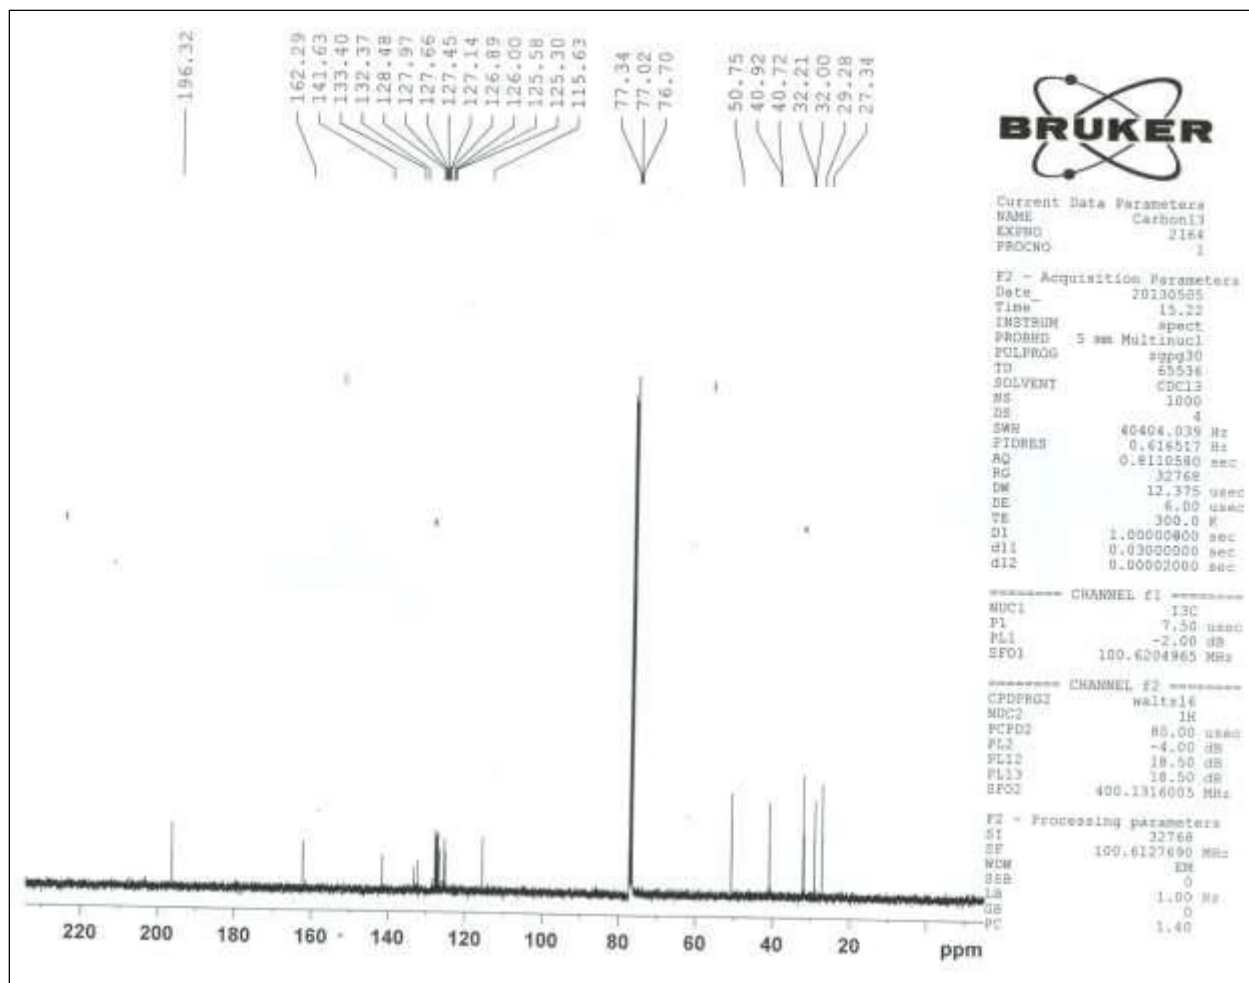

Fig. 51.  $^{13}\text{C}$  NMR of 14m.

**9-(5-bromo-2-hydroxyphenyl)-3,4,6,7-tetrahydro-3,3,6,6-tetramethyl-2H-xanthene-1,8(5H,9H)-dione (14n)**

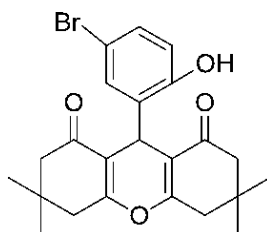

M. P.: 268-271 °C; FT-IR (KBr,  $\text{Cm}^{-1}$ )  $\nu_{\text{max}}$ : 3000, 1660, 1510, 1415, 1356, 1340, 912.  $^1\text{H}$  NMR (500 MHz,  $\text{CDCl}_3$ )  $\delta$ : 0.90 (s, 6H), 0.97 (s, 3H), 1.05 (s, 3H), 2.02-2.06 (d,  $J=8.3$  Hz, 2H), 2.23-2.35 (dd,  $J=6.3$ , 4H), 2.51-2.56 (t,  $J=3.9$ , 2H), 5.54 (s, 1H), 6.94-6.96 (d,  $J=3.4$  Hz, 1H), 7.04 (s, 1H), 7.27-7.29 (d,  $J=3.4$  Hz, 2H), 10.56 (OH, 1H).  $^{13}\text{C}$  NMR (125 MHz,  $\text{CDCl}_3$ )  $\delta$ : 26.99, 28.41, 30.02, 32.48, 43.70, 51.22, 100.39, 111.30, 116.32, 118.61, 129.15, 130.56, 131.44, 149.83, 165.34, 196.05, 196.50. Anal. Calcd for  $\text{C}_{24}\text{H}_{28}\text{O}_3$ : C, 79.09; H, 7.74; O, 13.17; Found: C, 79.18; H, 7.89; O, 13.31.

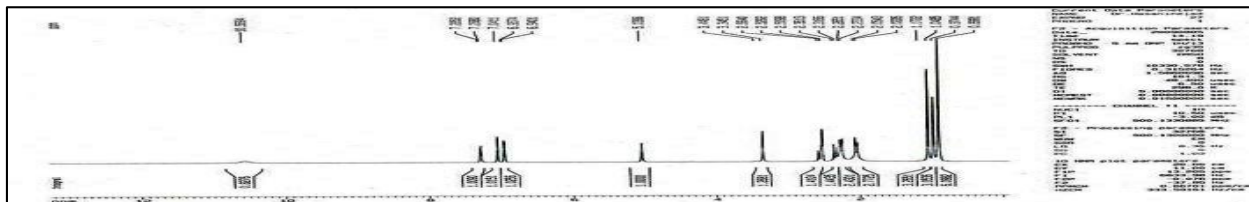

**Fig. 52.**  $^1\text{H}$  NMR of **14n**.



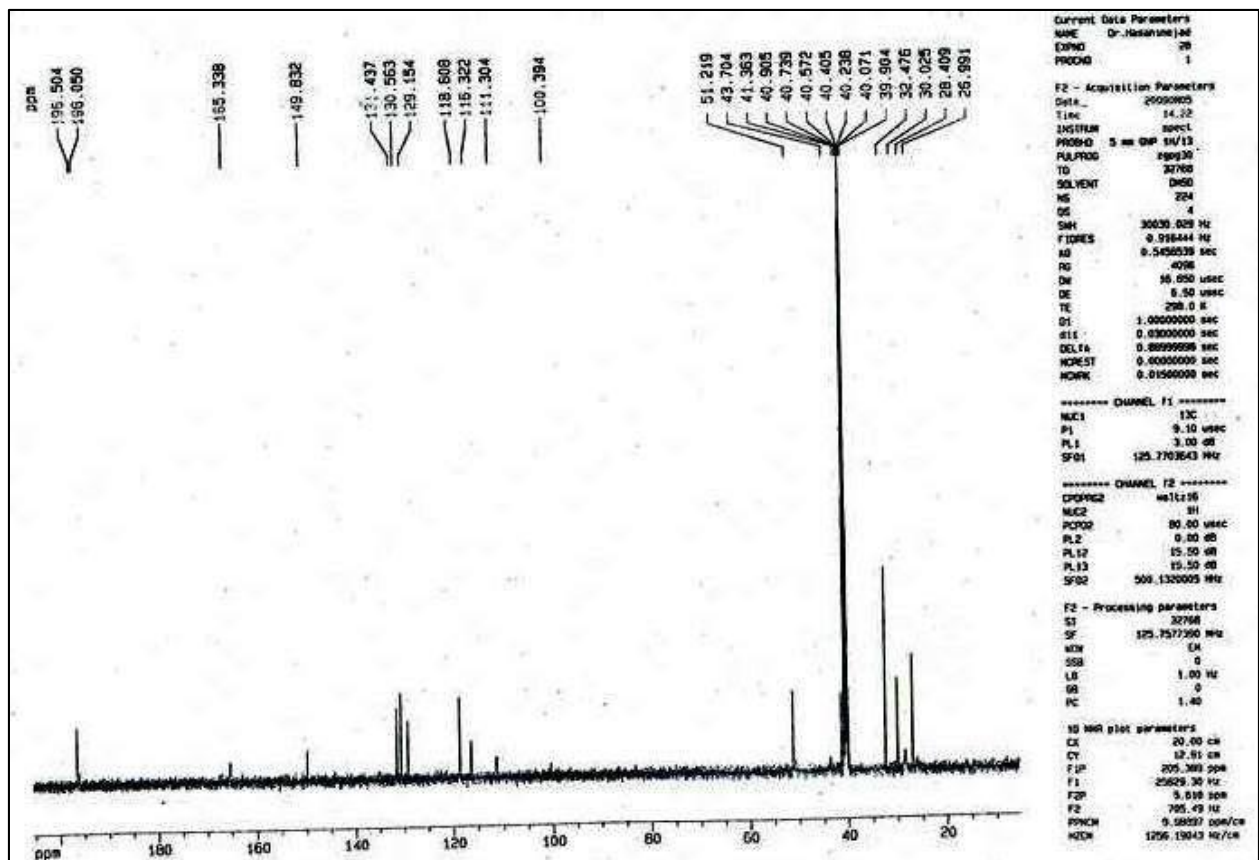

Fig. 53. <sup>13</sup>C NMR of 14n.

3,4,6,7-tetrahydro-3,6,9-triphenyl-2H-xanthene-1,8(5H,9H)-dione (15a)

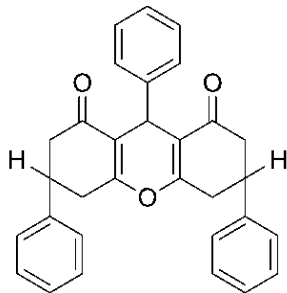

M. P.: 196-198 °C; FT-IR (KBr,  $\text{Cm}^{-1}$ )  $\nu_{\text{max}}$ : 3031, 1667, 1365, 1188, 1134, 995, 694.  $^1\text{H}$  NMR (400 MHz,  $\text{CDCl}_3$ )  $\delta$ : 2.57-2.75 (m, 4H), 2.80-3.01 (m, 4H), 3.30-3.55 (d,  $J=3.9$  Hz, 2H), 4.92-4.95 (d,  $J=3.5$  Hz, 1H), 7.18-7.45 (m, Ar-H, 15H).  $^{13}\text{C}$  NMR (100 MHz,  $\text{CDCl}_3$ )  $\delta$ : 31.98, 34.74, 38.26, 38.82, 43.89, 116.73, 126.65, 127.25, 128.39, 128.89, 142.11, 143.859, 144.25, 162.94, 195.59. Anal. Calcd for  $\text{C}_{31}\text{H}_{26}\text{O}_3$ : C, 83.38; H, 5.87; O, 10.75; Found: C, 83.47; H, 5.95; O, 10.83.

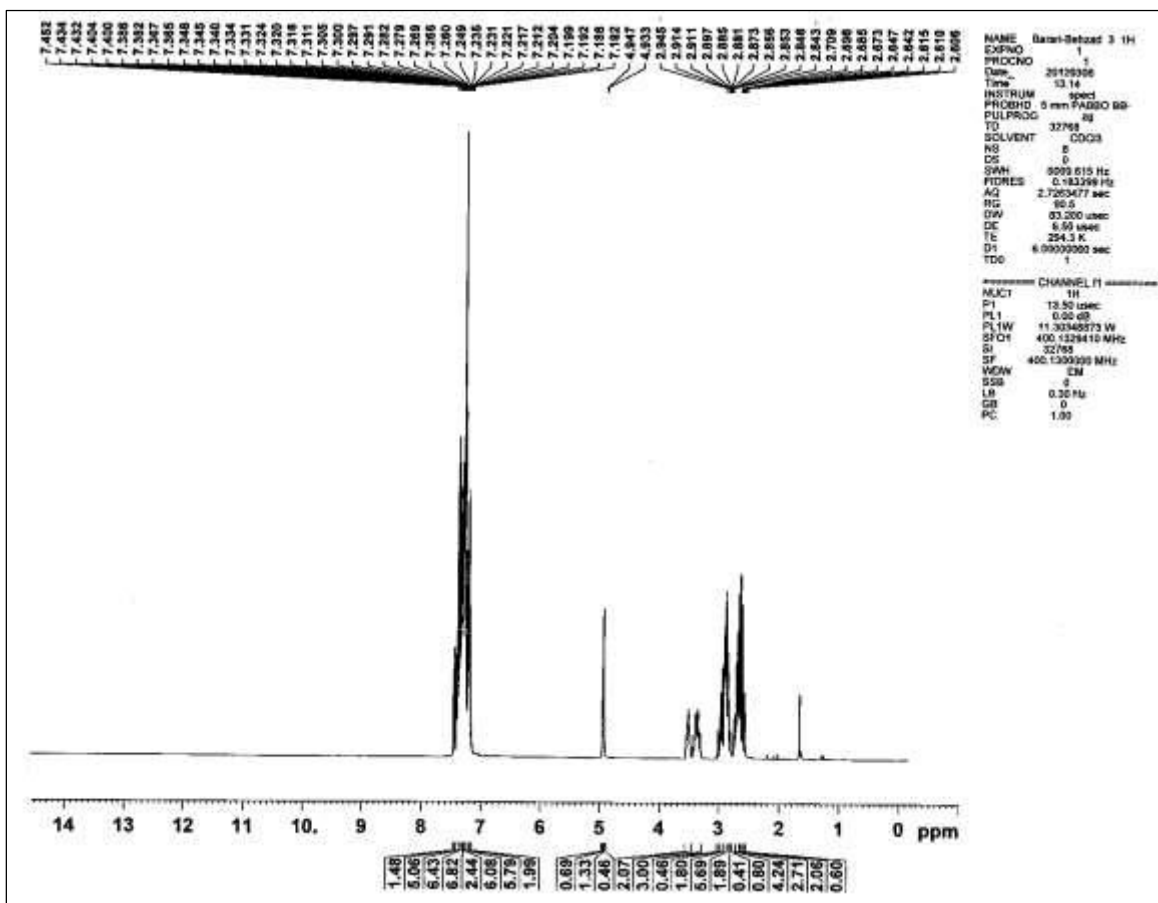

Fig. 54.  $^1\text{H}$  NMR of 15a.

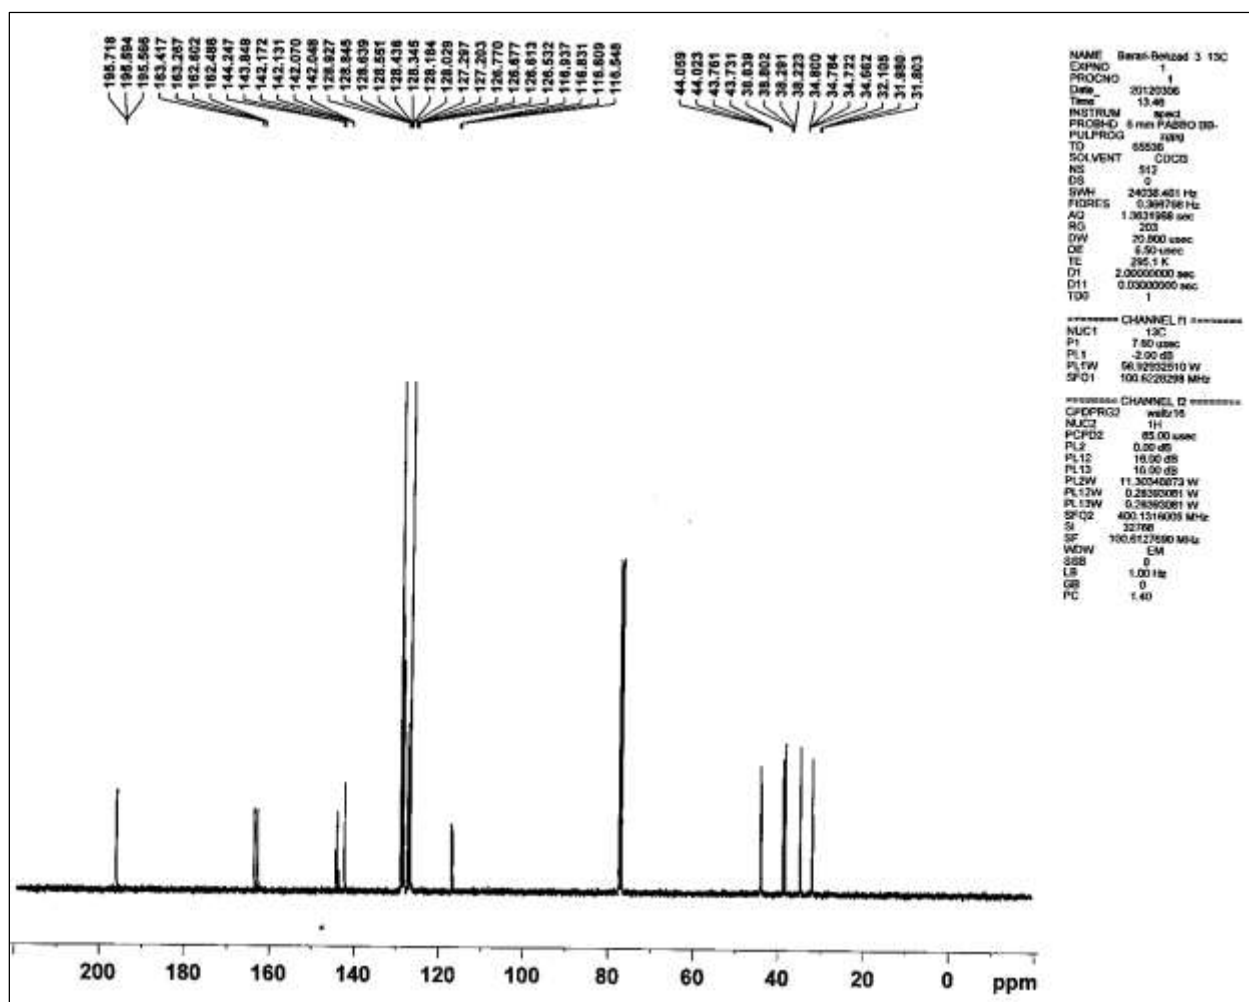

Fig. 55.  $^{13}\text{C}$  NMR of 15a.

**9-(4-chlorophenyl)-3,4,6,7-tetrahydro-3,6-diphenyl-2H-xanthene-1,8(5H,9H)-dione (15b)**

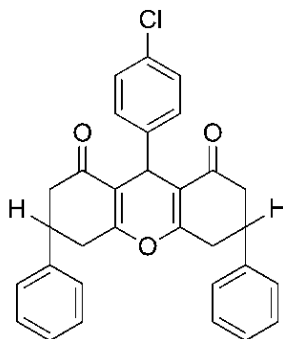

M. P.: 234-236 °C; FT-IR (KBr,  $\text{Cm}^{-1}$ )  $\nu_{\text{max}}$ : 3031, 1666, 1357, 1188, 1134, 995, 756, 694.  $^1\text{H}$  NMR (400 MHz,  $\text{CDCl}_3$ )  $\delta$ : 2.56-2.76 (m, 4H), 2.81-3.00 (m, 4H), 3.30-3.54 (d,  $J=3.9$  Hz, 2H), 4.88-4.89 (d,  $J=2.75$  Hz, 1H), 7.17-7.40 (m, Ar-H, 14H).  $^{13}\text{C}$  NMR (100 MHz,  $\text{CDCl}_3$ )  $\delta$ : 31.59, 34.69, 38.28, 38.61, 43.79, 116.33, 126.70, 127.31, 128.30, 128.91, 129.96, 132.29, 141.92, 142.36, 142.77, 195.61. Anal. Calcd. for  $\text{C}_{31}\text{H}_{25}\text{ClO}_3$ : C, 77.41; H, 5.24; Cl, 7.37; O, 9.98; Found: C, 77.50; H, 5.33; Cl, 7.45; O, 10.08.

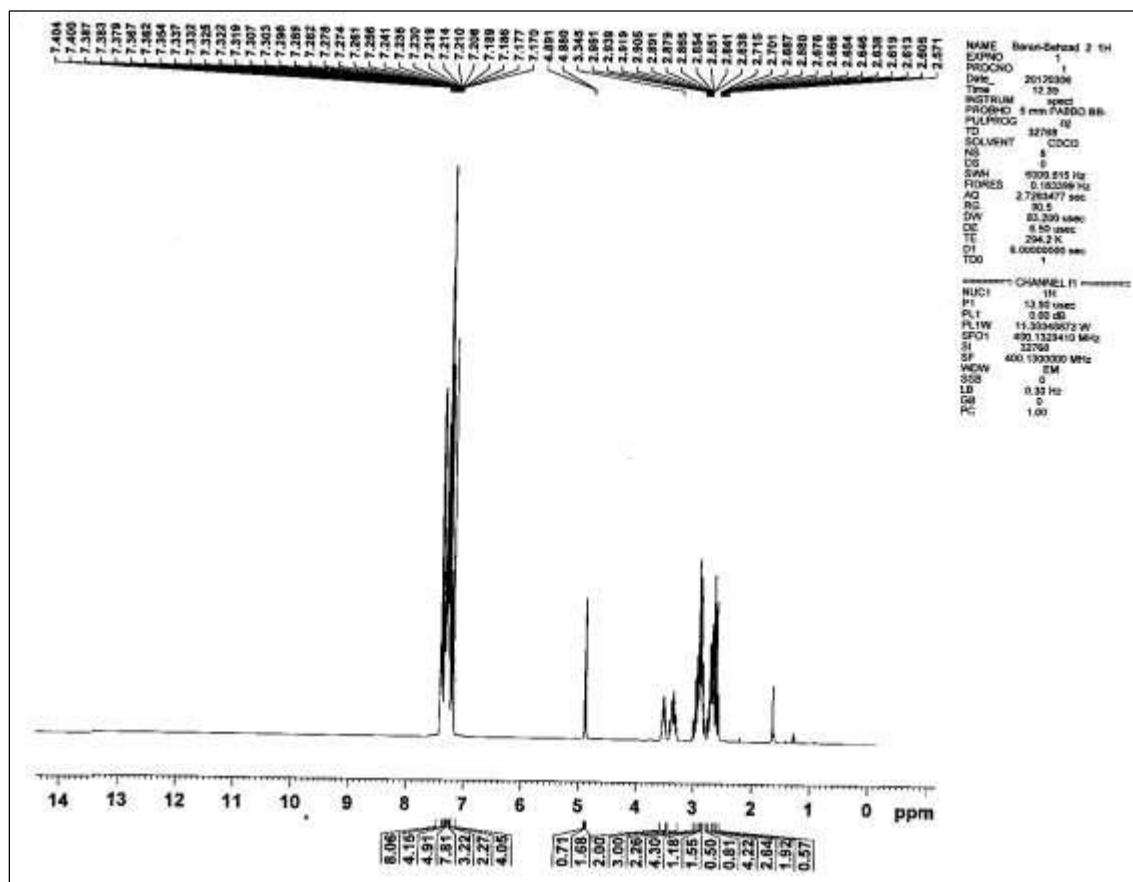

**Fig. 56.**  $^1\text{H}$  NMR of 15b.

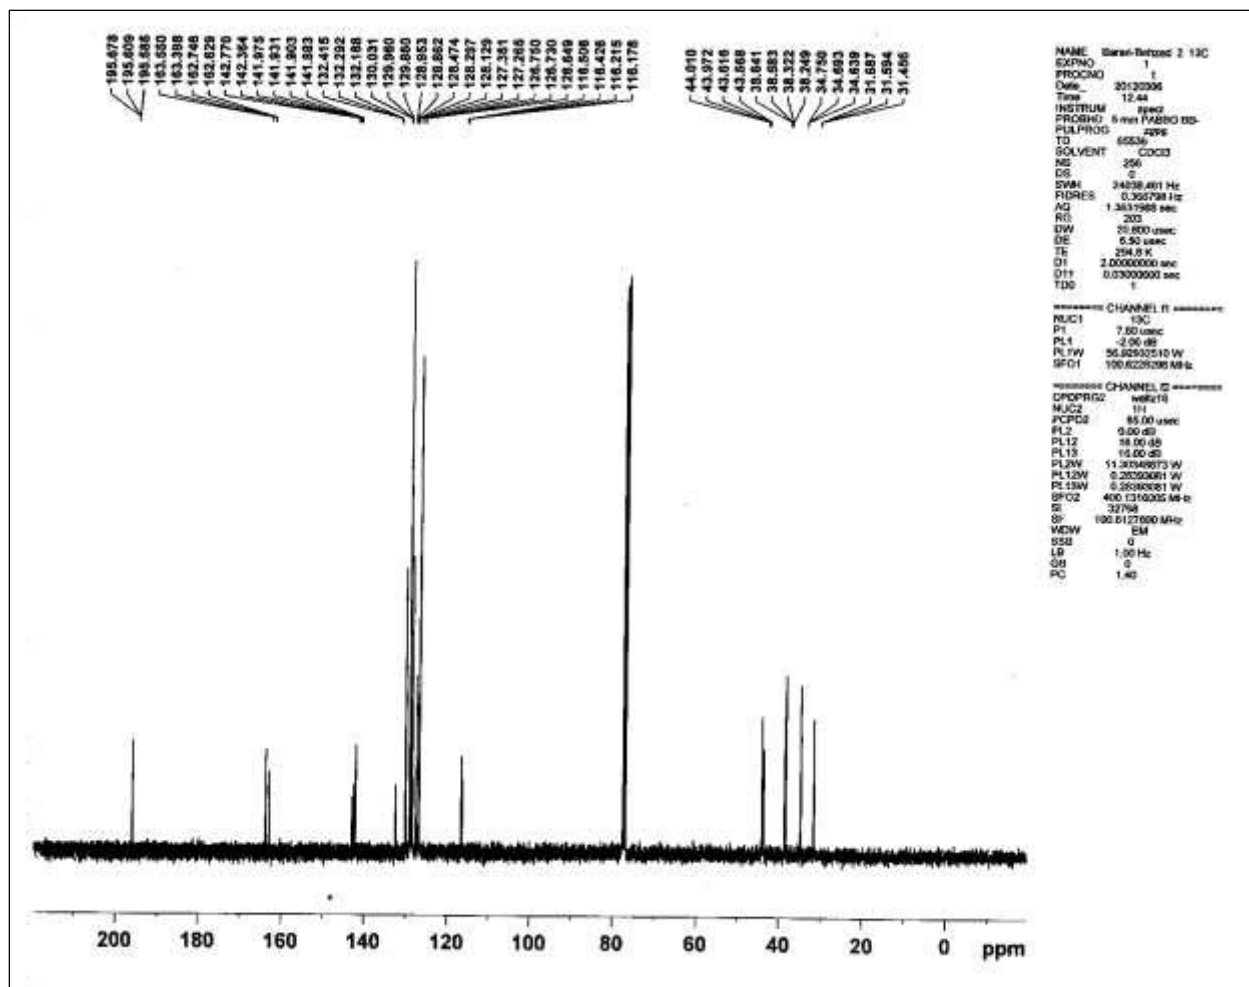

Fig. 57.  $^{13}\text{C}$  NMR of 15b.

**9-(4-Methylphenyl)-3,4,6,7-tetrahydro-3,6-diphenyl-2H-xanthene-1,8(5H,9H)-dione (15c)**

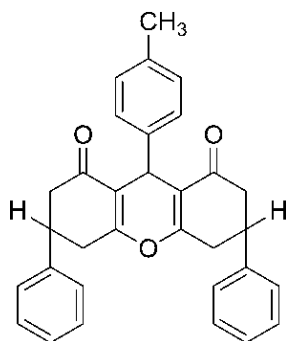

M. P.: 204-208 °C; FT-IR (KBr,  $\text{Cm}^{-1}$ )  $\nu_{\text{max}}$ : 2939, 1666, 1504, 1358, 1242, 1180, 1134, 1033, 987, 764, 702.  $^1\text{H}$  NMR (400 MHz,  $\text{CDCl}_3$ )  $\delta$ : 2.56-2.73 (m, 4H), 2.79-2.95 (m, 4H), 3.30-3.53 (d,  $J=3.2$  Hz, 2H), 3.88 (s, 3H), 4.86-4.88 (d,  $J=3.2$  Hz, 1H), 6.75-6.87 (m, Ar-H, 2H), 7.17-7.40 (m, Ar-H, 12H).  $^{13}\text{C}$  NMR (100 MHz,  $\text{CDCl}_3$ )  $\delta$ : 31.03, 34.70, 38.29, 38.83, 43.91, 113.56, 116.85, 126.72, 127.12, 128.88, 129.51, 136.39, 142.12, 158.20, 163.14, 195.78. Anal. Calcd. for  $\text{C}_{32}\text{H}_{28}\text{O}_3$ : C, 83.45; H, 6.13; O, 10.42; Found: C, 83.52; H, 6.20; O, 10.51.

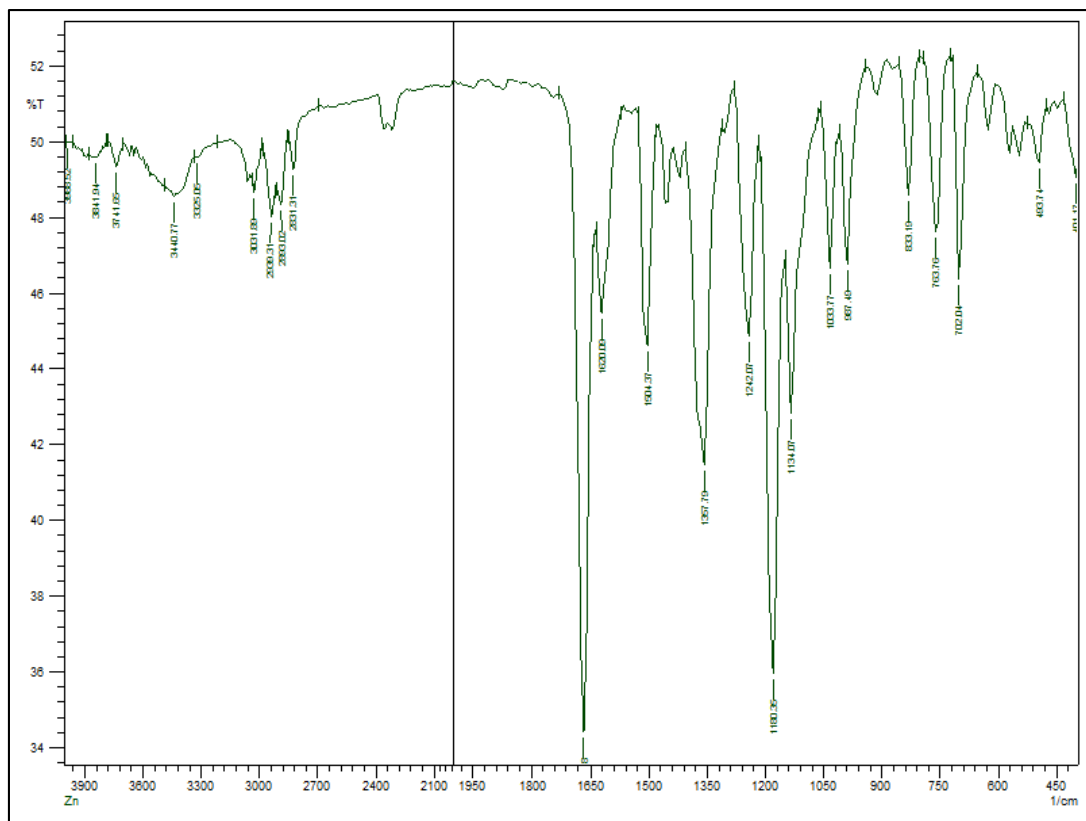

**Fig. 58.** FT-IR of 15c.

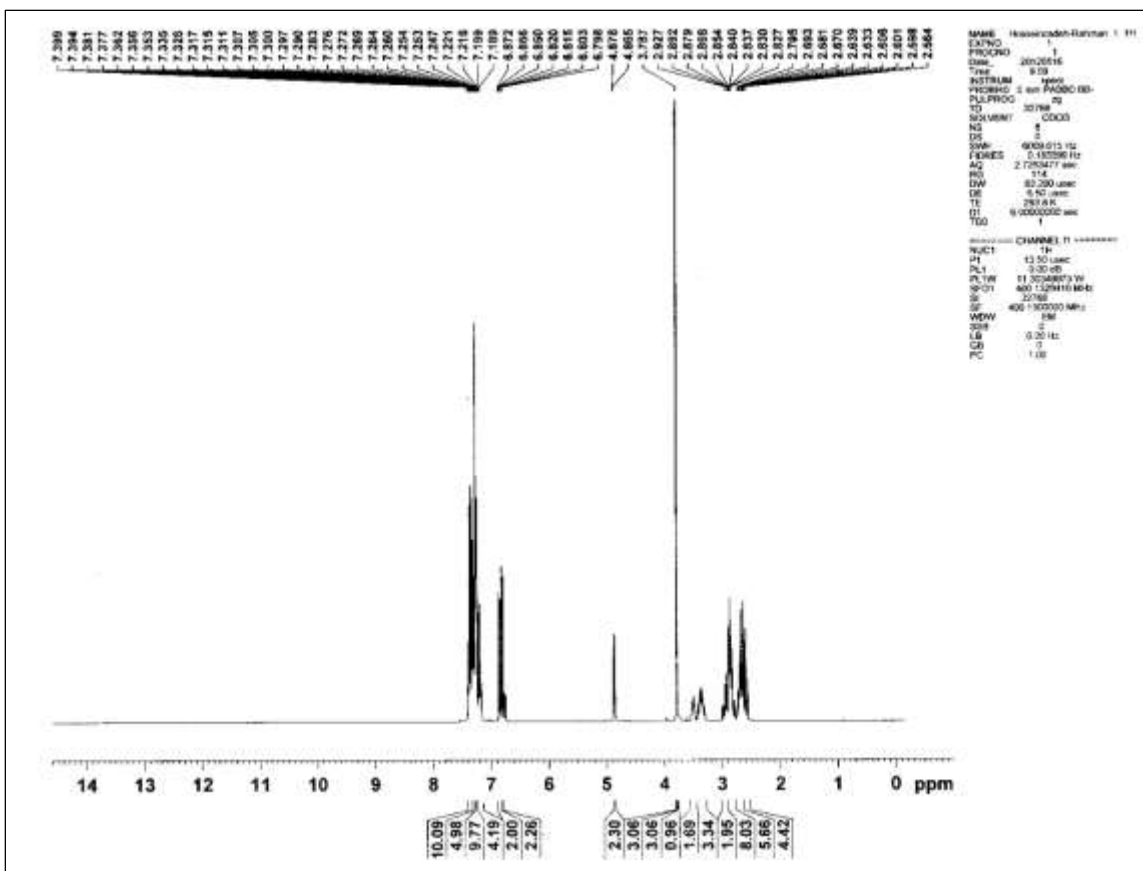

Fig. 59.  $^1\text{H}$  NMR of 15c.

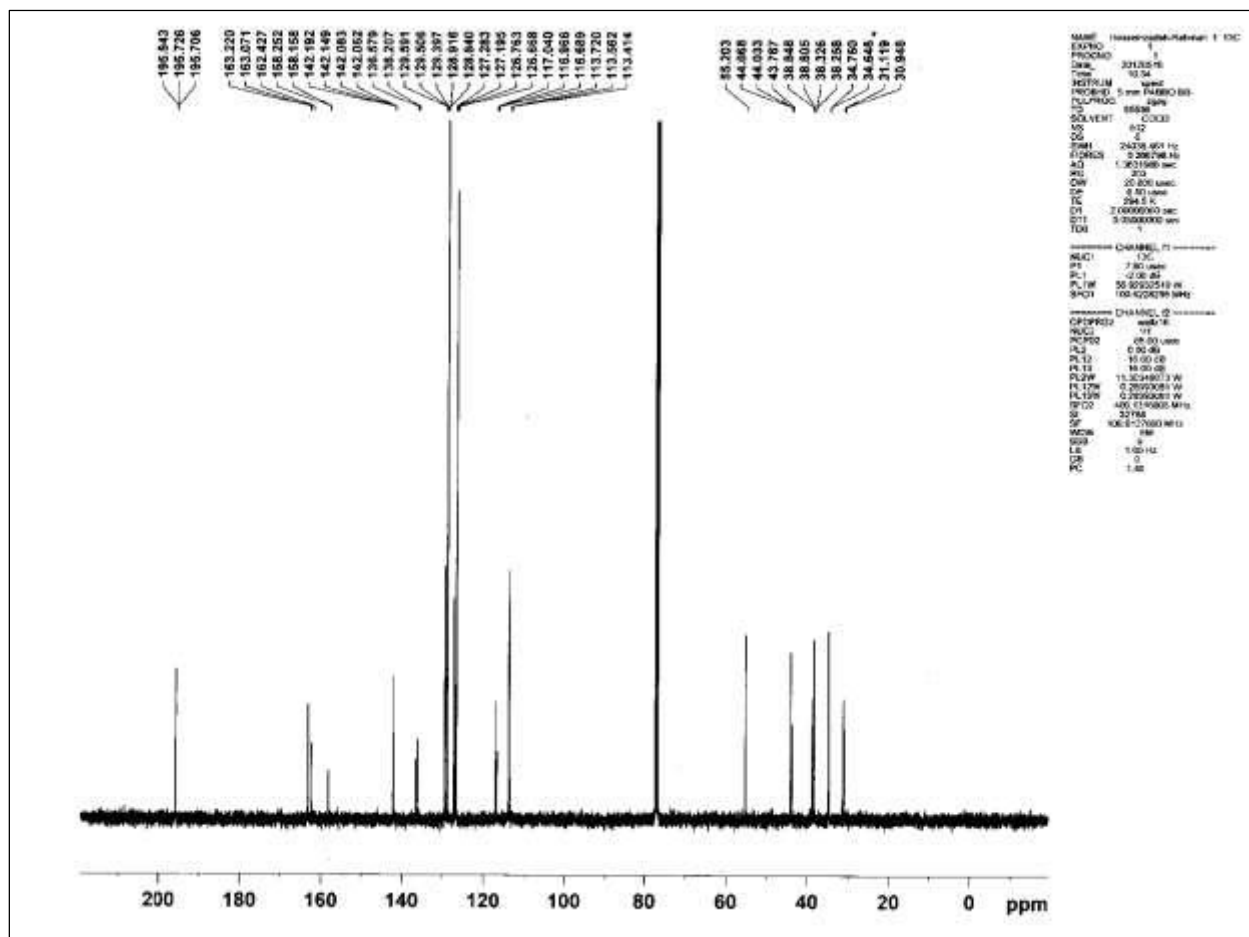

Fig. 60.  $^{13}\text{C}$  NMR of 15c.



**9-(4-Methoxyphenyl)-3,4,6,7-tetrahydro-3,6-diphenyl-2H-xanthene-1,8(5H,9H)-dione (15d)**

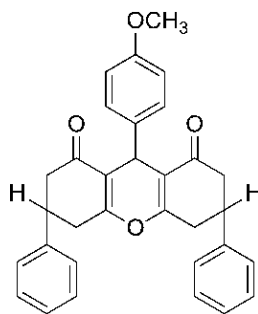

M. P.: 212-215 °C; FT-IR (KBr,  $\text{Cm}^{-1}$ )  $\nu_{\text{max}}$ : 3031, 1666, 1504, 1357, 1242, 1180, 1134, 987, 764, 702.  $^1\text{H}$  NMR (400 MHz,  $\text{CDCl}_3$ )  $\delta$ : 2.60-2.75 (m, 4H), 2.79-2.99 (m, 4H), 3.32-3.54 (d,  $J=3.4$  Hz, 2H), 3.79-3.80 (d,  $J=2.5$  Hz, 3H), 4.87-4.88 (d,  $J=3$  Hz, 1H), 6.80-6.88 (m, Ar-H, 4H), 7.19-7.40 (m, Ar-H, 10H).  $^{13}\text{C}$  NMR (100 MHz,  $\text{CDCl}_3$ )  $\delta$ : 31.04, 34.71, 38.30, 38.81, 43.91, 113.64, 116.85, 126.72, 127.24, 128.88, 129.45, 136.40, 142.12, 158.21, 163.10, 195.77. Anal. Calcd for  $\text{C}_{32}\text{H}_{28}\text{O}_4$ : C, 80.65; H, 5.92; O, 13.43; Found: C, 80.74; H, 6.02; O, 13.56.

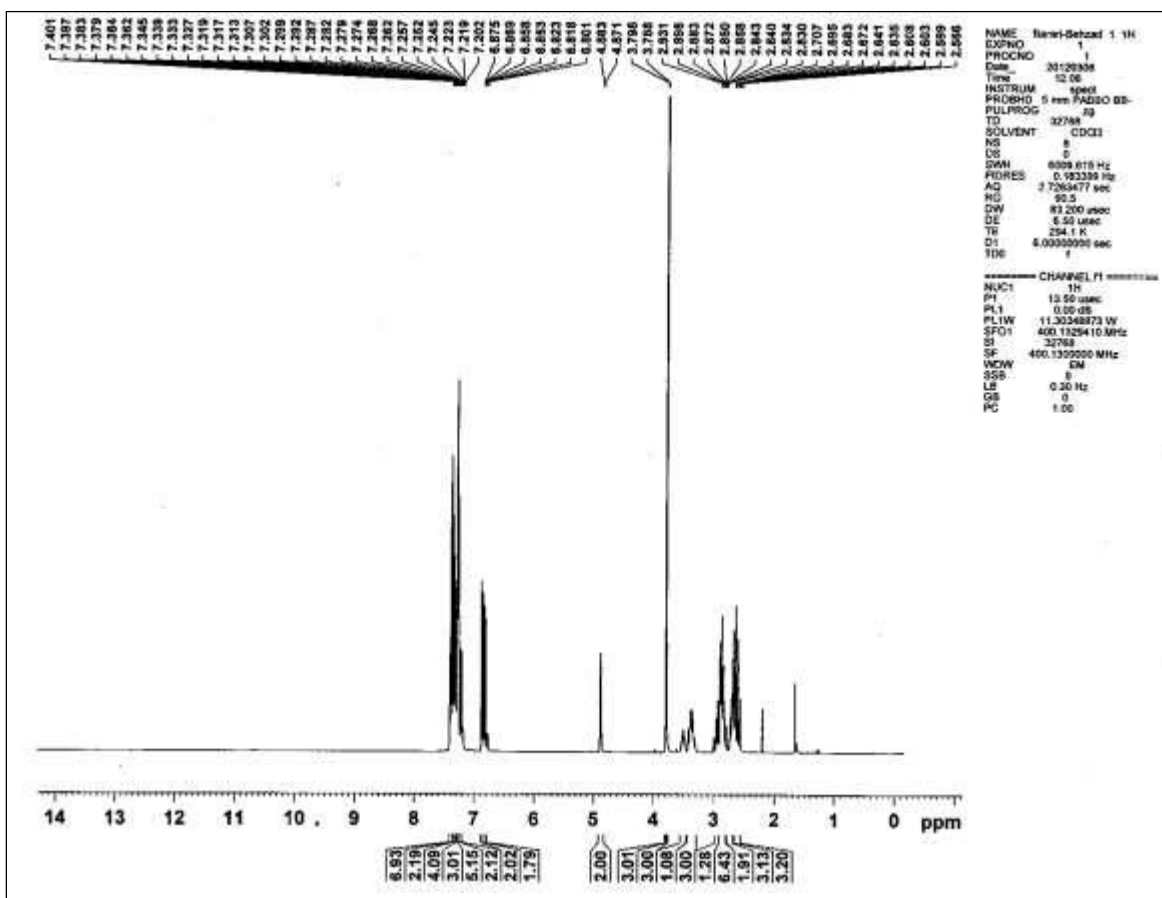

**Fig. 61.**  $^1\text{H}$  NMR of 15d.

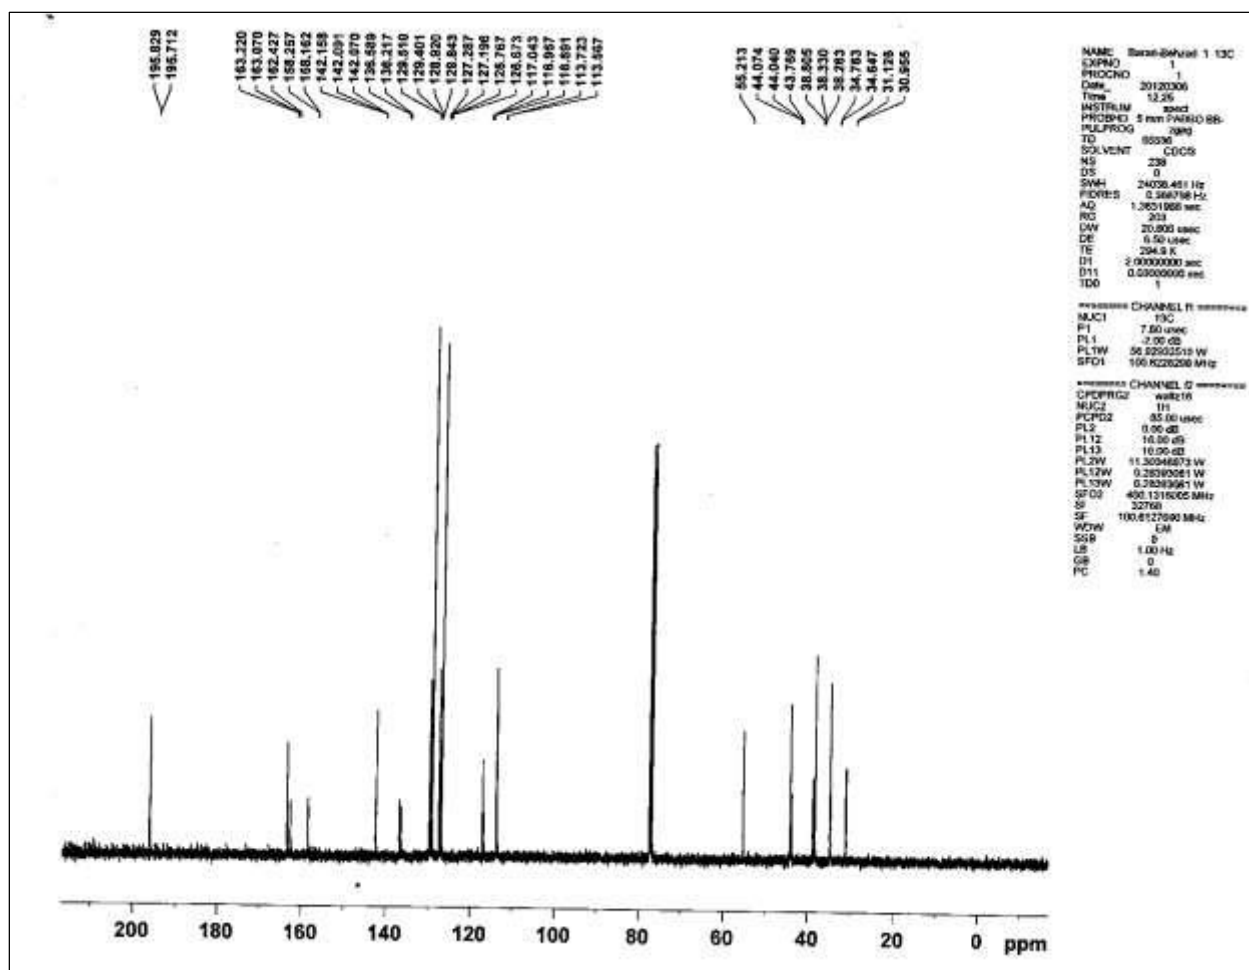

Fig. 62.  $^{13}\text{C}$  NMR of 15d.
